# Supplementary material
Source: publisher figshare collection journal article supplement (https://gsajournals.figshare.com/ndownloader/files/25753604)
Supplement: Supplementary file 1 [file 25753604]

## Sheet: Sheet1
C1706376	AUGUSTUS	CDS	5	100	0.46	+	0	transcript_id "g60647.t1"; gene_id "g60647";
C1712985	AUGUSTUS	CDS	11	101	0.27	+	0	transcript_id "g60649.t1"; gene_id "g60649";
C1719529	AUGUSTUS	CDS	15	102	0.73	+	0	transcript_id "g60652.t1"; gene_id "g60652";
C1722582	AUGUSTUS	exon	1	102	0.93	-	.	transcript_id "g60653.t1"; gene_id "g60653";
C1722582	AUGUSTUS	CDS	3	102	.	-	1	transcript_id "g60653.t1"; gene_id "g60653";
C1722829	AUGUSTUS	CDS	9	102	0.84	+	0	transcript_id "g60654.t1"; gene_id "g60654";
C1725085	AUGUSTUS	exon	1	97	0.43	+	.	transcript_id "g60655.t1"; gene_id "g60655";
C1725085	AUGUSTUS	CDS	1	69	.	+	0	transcript_id "g60655.t1"; gene_id "g60655";
C1737816	AUGUSTUS	CDS	1	104	0.55	+	0	transcript_id "g60657.t1"; gene_id "g60657";
C1739649	AUGUSTUS	exon	1	94	0.94	-	.	transcript_id "g60658.t1"; gene_id "g60658";
C1739649	AUGUSTUS	CDS	5	94	.	-	0	transcript_id "g60658.t1"; gene_id "g60658";
C1747347	AUGUSTUS	exon	1	105	0.66	-	.	transcript_id "g60659.t1"; gene_id "g60659";
C1747347	AUGUSTUS	CDS	4	105	.	-	0	transcript_id "g60659.t1"; gene_id "g60659";
C1753091	AUGUSTUS	CDS	1	105	0.91	+	2	transcript_id "g60660.t1"; gene_id "g60660";
C1757003	AUGUSTUS	CDS	7	105	0.52	+	0	transcript_id "g60661.t1"; gene_id "g60661";
C1765169	AUGUSTUS	CDS	22	106	1	+	0	transcript_id "g60662.t1"; gene_id "g60662";
C1766340	AUGUSTUS	CDS	10	106	0.46	+	0	transcript_id "g60663.t1"; gene_id "g60663";
C1767376	AUGUSTUS	CDS	1	106	0.54	+	0	transcript_id "g60664.t1"; gene_id "g60664";
C1774576	AUGUSTUS	CDS	1	106	0.95	+	0	transcript_id "g60665.t1"; gene_id "g60665";
C1779394	AUGUSTUS	exon	1	107	0.52	-	.	transcript_id "g60666.t1"; gene_id "g60666";
C1779394	AUGUSTUS	CDS	3	107	.	-	0	transcript_id "g60666.t1"; gene_id "g60666";
C1785092	AUGUSTUS	CDS	22	102	0.65	+	0	transcript_id "g60667.t1"; gene_id "g60667";
C1788662	AUGUSTUS	exon	7	45	0.36	-	.	transcript_id "g60668.t1"; gene_id "g60668";
C1788662	AUGUSTUS	CDS	7	14	.	-	0	transcript_id "g60668.t1"; gene_id "g60668";
C1810110	AUGUSTUS	CDS	1	109	0.62	+	2	transcript_id "g60672.t1"; gene_id "g60672";
C1820796	AUGUSTUS	exon	1	106	0.49	+	.	transcript_id "g60673.t1"; gene_id "g60673";
C1820796	AUGUSTUS	CDS	1	78	.	+	0	transcript_id "g60673.t1"; gene_id "g60673";
C1821300	AUGUSTUS	exon	1	91	0.96	+	.	transcript_id "g60674.t1"; gene_id "g60674";
C1821300	AUGUSTUS	CDS	1	69	.	+	0	transcript_id "g60674.t1"; gene_id "g60674";
C1823784	AUGUSTUS	CDS	1	110	0.25	+	0	transcript_id "g60675.t1"; gene_id "g60675";
C1832248	AUGUSTUS	exon	1	104	0.79	+	.	transcript_id "g60676.t1"; gene_id "g60676";
C1832248	AUGUSTUS	CDS	1	80	.	+	2	transcript_id "g60676.t1"; gene_id "g60676";
C1839262	AUGUSTUS	CDS	15	106	0.68	+	0	transcript_id "g60677.t1"; gene_id "g60677";
C1839724	AUGUSTUS	CDS	1	111	0.93	+	1	transcript_id "g60678.t1"; gene_id "g60678";
C1847467	AUGUSTUS	CDS	3	112	0.87	+	0	transcript_id "g60679.t1"; gene_id "g60679";
C1847473	AUGUSTUS	exon	1	110	0.4	+	.	transcript_id "g60680.t1"; gene_id "g60680";
C1847473	AUGUSTUS	CDS	1	90	.	+	0	transcript_id "g60680.t1"; gene_id "g60680";
C1847863	AUGUSTUS	CDS	14	112	0.87	+	0	transcript_id "g60681.t1"; gene_id "g60681";
C1852105	AUGUSTUS	CDS	6	112	0.45	+	0	transcript_id "g60682.t1"; gene_id "g60682";
C1858150	AUGUSTUS	exon	1	110	0.51	+	.	transcript_id "g60683.t1"; gene_id "g60683";
C1858150	AUGUSTUS	CDS	1	87	.	+	0	transcript_id "g60683.t1"; gene_id "g60683";
C1860875	AUGUSTUS	CDS	1	113	0.45	+	0	transcript_id "g60684.t1"; gene_id "g60684";
C1862199	AUGUSTUS	CDS	1	113	0.37	-	1	transcript_id "g60685.t1"; gene_id "g60685";
C1863921	AUGUSTUS	CDS	7	113	0.54	-	1	transcript_id "g60686.t1"; gene_id "g60686";
C1866031	AUGUSTUS	CDS	15	113	0.86	+	0	transcript_id "g60687.t1"; gene_id "g60687";
C1871091	AUGUSTUS	CDS	15	113	0.59	+	0	transcript_id "g60688.t1"; gene_id "g60688";
C1876309	AUGUSTUS	CDS	1	114	0.87	+	1	transcript_id "g60689.t1"; gene_id "g60689";
C1879001	AUGUSTUS	CDS	12	114	0.83	-	1	transcript_id "g60690.t1"; gene_id "g60690";
C1880969	AUGUSTUS	CDS	1	114	0.36	+	2	transcript_id "g60691.t1"; gene_id "g60691";
C1882727	AUGUSTUS	exon	1	114	0.91	-	.	transcript_id "g60692.t1"; gene_id "g60692";
C1882727	AUGUSTUS	CDS	33	114	.	-	1	transcript_id "g60692.t1"; gene_id "g60692";
C1899892	AUGUSTUS	exon	7	55	0.45	-	.	transcript_id "g60693.t1"; gene_id "g60693";
C1899892	AUGUSTUS	CDS	7	25	.	-	0	transcript_id "g60693.t1"; gene_id "g60693";
C1906226	AUGUSTUS	CDS	14	115	0.83	+	0	transcript_id "g60694.t1"; gene_id "g60694";
C1907474	AUGUSTUS	CDS	1	115	0.91	-	1	transcript_id "g60695.t1"; gene_id "g60695";
C1923516	AUGUSTUS	exon	1	102	0.37	+	.	transcript_id "g60696.t1"; gene_id "g60696";
C1923516	AUGUSTUS	CDS	1	74	.	+	2	transcript_id "g60696.t1"; gene_id "g60696";
C1924624	AUGUSTUS	CDS	23	110	0.71	+	0	transcript_id "g60697.t1"; gene_id "g60697";
C1924958	AUGUSTUS	CDS	1	115	0.46	-	1	transcript_id "g60698.t1"; gene_id "g60698";
C1927872	AUGUSTUS	exon	55	111	0.6	+	.	transcript_id "g60699.t1"; gene_id "g60699";
C1927872	AUGUSTUS	CDS	55	82	.	+	1	transcript_id "g60699.t1"; gene_id "g60699";
C1927874	AUGUSTUS	exon	55	111	0.75	+	.	transcript_id "g60700.t1"; gene_id "g60700";
C1927874	AUGUSTUS	CDS	55	82	.	+	1	transcript_id "g60700.t1"; gene_id "g60700";
C1927876	AUGUSTUS	exon	55	111	0.57	+	.	transcript_id "g60701.t1"; gene_id "g60701";
C1927876	AUGUSTUS	CDS	55	82	.	+	1	transcript_id "g60701.t1"; gene_id "g60701";
C1930136	AUGUSTUS	exon	1	105	0.87	-	.	transcript_id "g60702.t1"; gene_id "g60702";
C1930136	AUGUSTUS	CDS	37	105	.	-	0	transcript_id "g60702.t1"; gene_id "g60702";
C1933328	AUGUSTUS	exon	1	115	0.72	-	.	transcript_id "g60703.t1"; gene_id "g60703";
C1933328	AUGUSTUS	CDS	3	115	.	-	2	transcript_id "g60703.t1"; gene_id "g60703";
C1938774	AUGUSTUS	exon	1	115	0.81	+	.	transcript_id "g60704.t1"; gene_id "g60704";
C1938774	AUGUSTUS	CDS	1	95	.	+	2	transcript_id "g60704.t1"; gene_id "g60704";
C1939310	AUGUSTUS	CDS	20	115	0.78	+	0	transcript_id "g60705.t1"; gene_id "g60705";
C1941538	AUGUSTUS	CDS	1	115	0.41	+	0	transcript_id "g60706.t1"; gene_id "g60706";
C1942982	AUGUSTUS	exon	1	115	0.61	-	.	transcript_id "g60707.t1"; gene_id "g60707";
C1942982	AUGUSTUS	CDS	28	115	.	-	1	transcript_id "g60707.t1"; gene_id "g60707";
C1954942	AUGUSTUS	exon	1	115	0.49	-	.	transcript_id "g60708.t1"; gene_id "g60708";
C1954942	AUGUSTUS	CDS	3	115	.	-	2	transcript_id "g60708.t1"; gene_id "g60708";
C1958476	AUGUSTUS	exon	1	102	0.37	+	.	transcript_id "g60709.t1"; gene_id "g60709";
C1958476	AUGUSTUS	CDS	1	52	.	+	1	transcript_id "g60709.t1"; gene_id "g60709";
C1961464	AUGUSTUS	exon	1	104	0.64	+	.	transcript_id "g60710.t1"; gene_id "g60710";
C1961464	AUGUSTUS	CDS	1	80	.	+	2	transcript_id "g60710.t1"; gene_id "g60710";
C1962750	AUGUSTUS	CDS	1	115	0.55	+	0	transcript_id "g60711.t1"; gene_id "g60711";
C1964806	AUGUSTUS	CDS	1	115	0.78	+	0	transcript_id "g60712.t1"; gene_id "g60712";
C1969176	AUGUSTUS	CDS	11	115	0.34	+	0	transcript_id "g60713.t1"; gene_id "g60713";
C1970464	AUGUSTUS	CDS	1	115	0.43	+	1	transcript_id "g60714.t1"; gene_id "g60714";
C1971840	AUGUSTUS	exon	1	115	0.98	-	.	transcript_id "g60715.t1"; gene_id "g60715";
C1971840	AUGUSTUS	CDS	11	115	.	-	0	transcript_id "g60715.t1"; gene_id "g60715";
C1974386	AUGUSTUS	exon	1	115	0.82	-	.	transcript_id "g60716.t1"; gene_id "g60716";
C1974386	AUGUSTUS	CDS	20	115	.	-	0	transcript_id "g60716.t1"; gene_id "g60716";
C1975256	AUGUSTUS	CDS	1	93	0.2	-	0	transcript_id "g60717.t1"; gene_id "g60717";
C1975746	AUGUSTUS	exon	1	115	0.35	-	.	transcript_id "g60718.t1"; gene_id "g60718";
C1975746	AUGUSTUS	CDS	3	115	.	-	2	transcript_id "g60718.t1"; gene_id "g60718";
C1975830	AUGUSTUS	exon	1	83	0.28	+	.	transcript_id "g60719.t1"; gene_id "g60719";
C1975830	AUGUSTUS	CDS	1	56	.	+	2	transcript_id "g60719.t1"; gene_id "g60719";
C1978552	AUGUSTUS	CDS	1	115	0.52	-	0	transcript_id "g60720.t1"; gene_id "g60720";
C1979672	AUGUSTUS	exon	1	115	0.76	-	.	transcript_id "g60721.t1"; gene_id "g60721";
C1979672	AUGUSTUS	CDS	10	115	.	-	1	transcript_id "g60721.t1"; gene_id "g60721";
C1986992	AUGUSTUS	CDS	1	115	0.98	+	2	transcript_id "g60722.t1"; gene_id "g60722";
C1988902	AUGUSTUS	CDS	1	115	0.46	+	1	transcript_id "g60723.t1"; gene_id "g60723";
C1989384	AUGUSTUS	CDS	7	105	1	-	2	transcript_id "g60724.t1"; gene_id "g60724";
C1990786	AUGUSTUS	CDS	1	115	0.78	+	1	transcript_id "g60725.t1"; gene_id "g60725";
C1995492	AUGUSTUS	CDS	22	115	0.99	+	0	transcript_id "g60726.t1"; gene_id "g60726";
C2002722	AUGUSTUS	CDS	16	115	0.52	+	0	transcript_id "g60727.t1"; gene_id "g60727";
C2015364	AUGUSTUS	exon	1	115	0.7	-	.	transcript_id "g60728.t1"; gene_id "g60728";
C2015364	AUGUSTUS	CDS	6	115	.	-	2	transcript_id "g60728.t1"; gene_id "g60728";
C2017944	AUGUSTUS	exon	7	55	0.53	-	.	transcript_id "g60729.t1"; gene_id "g60729";
C2017944	AUGUSTUS	CDS	7	26	.	-	0	transcript_id "g60729.t1"; gene_id "g60729";
C2028800	AUGUSTUS	CDS	1	115	0.99	-	1	transcript_id "g60730.t1"; gene_id "g60730";
C2048550	AUGUSTUS	CDS	14	117	0.55	+	0	transcript_id "g60731.t1"; gene_id "g60731";
C2066034	AUGUSTUS	CDS	23	115	0.41	+	0	transcript_id "g60732.t1"; gene_id "g60732";
C2067218	AUGUSTUS	CDS	7	120	0.35	-	0	transcript_id "g60733.t1"; gene_id "g60733";
C2067974	AUGUSTUS	CDS	7	73	0.35	+	0	transcript_id "g60734.t1"; gene_id "g60734";
C2068126	AUGUSTUS	CDS	7	120	0.97	+	0	transcript_id "g60735.t1"; gene_id "g60735";
C2073172	AUGUSTUS	CDS	1	121	0.91	+	0	transcript_id "g60736.t1"; gene_id "g60736";
C2074514	AUGUSTUS	CDS	23	121	0.75	+	0	transcript_id "g60737.t1"; gene_id "g60737";
C2074668	AUGUSTUS	CDS	5	121	0.99	+	0	transcript_id "g60738.t1"; gene_id "g60738";
C2075460	AUGUSTUS	CDS	24	121	0.79	+	0	transcript_id "g60739.t1"; gene_id "g60739";
C2076098	AUGUSTUS	CDS	1	121	0.66	-	0	transcript_id "g60740.t1"; gene_id "g60740";
C2077970	AUGUSTUS	exon	19	75	0.57	-	.	transcript_id "g60741.t1"; gene_id "g60741";
C2077970	AUGUSTUS	CDS	19	46	.	-	0	transcript_id "g60741.t1"; gene_id "g60741";
C2082544	AUGUSTUS	CDS	1	122	0.83	+	0	transcript_id "g60742.t1"; gene_id "g60742";
C2086576	AUGUSTUS	CDS	20	123	0.72	+	0	transcript_id "g60743.t1"; gene_id "g60743";
C2089594	AUGUSTUS	CDS	22	119	0.62	+	0	transcript_id "g60744.t1"; gene_id "g60744";
C2095863	AUGUSTUS	exon	1	115	0.84	-	.	transcript_id "g60745.t1"; gene_id "g60745";
C2095863	AUGUSTUS	CDS	20	115	.	-	0	transcript_id "g60745.t1"; gene_id "g60745";
C2099851	AUGUSTUS	CDS	10	125	0.59	+	0	transcript_id "g60746.t1"; gene_id "g60746";
C2104939	AUGUSTUS	CDS	3	126	0.98	+	0	transcript_id "g60747.t1"; gene_id "g60747";
C2107257	AUGUSTUS	CDS	17	127	0.83	+	0	transcript_id "g60748.t1"; gene_id "g60748";
C2108413	AUGUSTUS	exon	1	117	0.83	-	.	transcript_id "g60749.t1"; gene_id "g60749";
C2108413	AUGUSTUS	CDS	12	117	.	-	1	transcript_id "g60749.t1"; gene_id "g60749";
C2109119	AUGUSTUS	CDS	12	127	0.4	-	2	transcript_id "g60750.t1"; gene_id "g60750";
C2109161	AUGUSTUS	CDS	1	127	0.67	+	0	transcript_id "g60752.t1"; gene_id "g60752";
C2109301	AUGUSTUS	CDS	1	127	0.44	+	1	transcript_id "g60751.t1"; gene_id "g60751";
C2109967	AUGUSTUS	CDS	2	127	0.45	+	0	transcript_id "g60753.t1"; gene_id "g60753";
C2111297	AUGUSTUS	CDS	1	117	0.4	-	0	transcript_id "g60754.t1"; gene_id "g60754";
C2111299	AUGUSTUS	CDS	1	117	0.45	-	0	transcript_id "g60755.t1"; gene_id "g60755";
C2114041	AUGUSTUS	CDS	7	128	0.62	-	0	transcript_id "g60756.t1"; gene_id "g60756";
C2114241	AUGUSTUS	exon	1	128	0.88	-	.	transcript_id "g60757.t1"; gene_id "g60757";
C2114241	AUGUSTUS	CDS	18	128	.	-	0	transcript_id "g60757.t1"; gene_id "g60757";
C2116067	AUGUSTUS	CDS	1	123	0.47	+	1	transcript_id "g60758.t1"; gene_id "g60758";
C2119369	AUGUSTUS	CDS	1	129	0.48	-	0	transcript_id "g60759.t1"; gene_id "g60759";
C2119679	AUGUSTUS	CDS	6	129	0.51	+	0	transcript_id "g60761.t1"; gene_id "g60761";
C2119689	AUGUSTUS	CDS	7	129	0.74	-	2	transcript_id "g60760.t1"; gene_id "g60760";
C2120001	AUGUSTUS	CDS	10	129	0.64	+	0	transcript_id "g60762.t1"; gene_id "g60762";
C2121891	AUGUSTUS	CDS	11	129	0.47	+	0	transcript_id "g60763.t1"; gene_id "g60763";
C2125009	AUGUSTUS	CDS	24	130	0.59	+	0	transcript_id "g60764.t1"; gene_id "g60764";
C2125319	AUGUSTUS	exon	1	130	0.73	-	.	transcript_id "g60765.t1"; gene_id "g60765";
C2125319	AUGUSTUS	CDS	9	130	.	-	2	transcript_id "g60765.t1"; gene_id "g60765";
C2126653	AUGUSTUS	exon	7	75	0.52	-	.	transcript_id "g60766.t1"; gene_id "g60766";
C2126653	AUGUSTUS	CDS	7	48	.	-	0	transcript_id "g60766.t1"; gene_id "g60766";
C2126817	AUGUSTUS	exon	1	130	0.97	+	.	transcript_id "g60767.t1"; gene_id "g60767";
C2126817	AUGUSTUS	CDS	1	115	.	+	1	transcript_id "g60767.t1"; gene_id "g60767";
C2128573	AUGUSTUS	exon	1	120	0.68	-	.	transcript_id "g60768.t1"; gene_id "g60768";
C2128573	AUGUSTUS	CDS	16	120	.	-	0	transcript_id "g60768.t1"; gene_id "g60768";
C2131361	AUGUSTUS	exon	46	126	0.28	+	.	transcript_id "g60769.t1"; gene_id "g60769";
C2131361	AUGUSTUS	CDS	86	126	.	+	0	transcript_id "g60769.t1"; gene_id "g60769";
C2134715	AUGUSTUS	exon	1	130	0.72	+	.	transcript_id "g60770.t1"; gene_id "g60770";
C2134715	AUGUSTUS	CDS	1	107	.	+	2	transcript_id "g60770.t1"; gene_id "g60770";
C2137418	AUGUSTUS	exon	1	130	0.63	+	.	transcript_id "g60771.t1"; gene_id "g60771";
C2137418	AUGUSTUS	CDS	1	108	.	+	0	transcript_id "g60771.t1"; gene_id "g60771";
C2137752	AUGUSTUS	exon	1	132	0.92	-	.	transcript_id "g60772.t1"; gene_id "g60772";
C2137752	AUGUSTUS	CDS	48	132	.	-	1	transcript_id "g60772.t1"; gene_id "g60772";
C2142320	AUGUSTUS	CDS	8	128	0.59	+	0	transcript_id "g60773.t1"; gene_id "g60773";
C2143352	AUGUSTUS	CDS	17	133	0.98	+	0	transcript_id "g60774.t1"; gene_id "g60774";
C2143354	AUGUSTUS	CDS	17	133	0.99	+	0	transcript_id "g60775.t1"; gene_id "g60775";
C2143606	AUGUSTUS	CDS	23	133	0.85	+	0	transcript_id "g60776.t1"; gene_id "g60776";
C2146780	AUGUSTUS	exon	1	134	0.65	-	.	transcript_id "g60777.t1"; gene_id "g60777";
C2146780	AUGUSTUS	CDS	10	134	.	-	2	transcript_id "g60777.t1"; gene_id "g60777";
C2149898	AUGUSTUS	exon	1	134	0.8	-	.	transcript_id "g60778.t1"; gene_id "g60778";
C2149898	AUGUSTUS	CDS	9	134	.	-	0	transcript_id "g60778.t1"; gene_id "g60778";
C2150738	AUGUSTUS	exon	1	135	0.84	-	.	transcript_id "g60779.t1"; gene_id "g60779";
C2150738	AUGUSTUS	CDS	120	135	.	-	1	transcript_id "g60779.t1"; gene_id "g60779";
C2151180	AUGUSTUS	CDS	8	135	0.46	+	0	transcript_id "g60780.t1"; gene_id "g60780";
C2152666	AUGUSTUS	exon	1	85	0.38	-	.	transcript_id "g60781.t1"; gene_id "g60781";
C2152666	AUGUSTUS	CDS	1	51	.	-	0	transcript_id "g60781.t1"; gene_id "g60781";
C2153430	AUGUSTUS	exon	1	135	0.81	-	.	transcript_id "g60782.t1"; gene_id "g60782";
C2153430	AUGUSTUS	CDS	8	135	.	-	2	transcript_id "g60782.t1"; gene_id "g60782";
C2153896	AUGUSTUS	exon	1	135	0.78	+	.	transcript_id "g60783.t1"; gene_id "g60783";
C2153896	AUGUSTUS	CDS	1	127	.	+	1	transcript_id "g60783.t1"; gene_id "g60783";
C2157116	AUGUSTUS	CDS	4	87	0.93	+	0	transcript_id "g60784.t1"; gene_id "g60784";
C2158144	AUGUSTUS	exon	1	136	0.97	-	.	transcript_id "g60785.t1"; gene_id "g60785";
C2158144	AUGUSTUS	CDS	17	136	.	-	0	transcript_id "g60785.t1"; gene_id "g60785";
C2158146	AUGUSTUS	exon	1	136	0.97	-	.	transcript_id "g60786.t1"; gene_id "g60786";
C2158146	AUGUSTUS	CDS	17	136	.	-	0	transcript_id "g60786.t1"; gene_id "g60786";
C2158624	AUGUSTUS	CDS	2	136	0.58	+	0	transcript_id "g60787.t1"; gene_id "g60787";
C2158634	AUGUSTUS	CDS	2	99	0.67	+	0	transcript_id "g60788.t1"; gene_id "g60788";
C2162012	AUGUSTUS	exon	1	137	0.88	-	.	transcript_id "g60789.t1"; gene_id "g60789";
C2162012	AUGUSTUS	CDS	13	137	.	-	2	transcript_id "g60789.t1"; gene_id "g60789";
C2164190	AUGUSTUS	CDS	1	137	0.96	+	0	transcript_id "g60790.t1"; gene_id "g60790";
C2164634	AUGUSTUS	CDS	1	137	0.94	-	1	transcript_id "g60791.t1"; gene_id "g60791";
C2167392	AUGUSTUS	exon	1	138	0.75	+	.	transcript_id "g60792.t1"; gene_id "g60792";
C2167392	AUGUSTUS	CDS	1	119	.	+	2	transcript_id "g60792.t1"; gene_id "g60792";
C2168038	AUGUSTUS	CDS	1	138	0.87	+	0	transcript_id "g60793.t1"; gene_id "g60793";
C2169436	AUGUSTUS	exon	7	55	0.34	-	.	transcript_id "g60794.t1"; gene_id "g60794";
C2169436	AUGUSTUS	CDS	7	14	.	-	0	transcript_id "g60794.t1"; gene_id "g60794";
C2169692	AUGUSTUS	CDS	1	138	0.78	+	0	transcript_id "g60795.t1"; gene_id "g60795";
C2171704	AUGUSTUS	CDS	13	134	0.88	+	0	transcript_id "g60796.t1"; gene_id "g60796";
C2171730	AUGUSTUS	CDS	23	139	0.76	+	0	transcript_id "g60797.t1"; gene_id "g60797";
C2172574	AUGUSTUS	CDS	1	129	0.96	-	0	transcript_id "g60798.t1"; gene_id "g60798";
C2175342	AUGUSTUS	exon	42	139	0.55	+	.	transcript_id "g60799.t1"; gene_id "g60799";
C2175342	AUGUSTUS	CDS	42	122	.	+	0	transcript_id "g60799.t1"; gene_id "g60799";
C2179172	AUGUSTUS	CDS	7	140	0.45	+	0	transcript_id "g60800.t1"; gene_id "g60800";
C2180174	AUGUSTUS	exon	1	140	0.95	-	.	transcript_id "g60801.t1"; gene_id "g60801";
C2180174	AUGUSTUS	CDS	30	140	.	-	0	transcript_id "g60801.t1"; gene_id "g60801";
C2182082	AUGUSTUS	CDS	1	141	0.71	+	0	transcript_id "g60802.t1"; gene_id "g60802";
C2182140	AUGUSTUS	exon	1	141	0.86	-	.	transcript_id "g60803.t1"; gene_id "g60803";
C2182140	AUGUSTUS	CDS	19	141	.	-	0	transcript_id "g60803.t1"; gene_id "g60803";
C2184198	AUGUSTUS	CDS	21	141	0.7	+	0	transcript_id "g60804.t1"; gene_id "g60804";
C2184628	AUGUSTUS	exon	1	141	0.77	+	.	transcript_id "g60805.t1"; gene_id "g60805";
C2184628	AUGUSTUS	CDS	1	140	.	+	2	transcript_id "g60805.t1"; gene_id "g60805";
C2186738	AUGUSTUS	exon	1	142	0.86	-	.	transcript_id "g60806.t1"; gene_id "g60806";
C2186738	AUGUSTUS	CDS	47	142	.	-	0	transcript_id "g60806.t1"; gene_id "g60806";
C2186740	AUGUSTUS	exon	1	142	0.9	-	.	transcript_id "g60807.t1"; gene_id "g60807";
C2186740	AUGUSTUS	CDS	47	142	.	-	0	transcript_id "g60807.t1"; gene_id "g60807";
C2188927	AUGUSTUS	CDS	8	142	0.6	+	0	transcript_id "g60812.t1"; gene_id "g60812";
C2189469	AUGUSTUS	CDS	11	142	0.77	+	0	transcript_id "g60808.t1"; gene_id "g60808";
C2189471	AUGUSTUS	CDS	11	142	0.75	+	0	transcript_id "g60809.t1"; gene_id "g60809";
C2189801	AUGUSTUS	CDS	8	142	0.98	+	0	transcript_id "g60810.t1"; gene_id "g60810";
C2189803	AUGUSTUS	CDS	8	142	0.99	+	0	transcript_id "g60811.t1"; gene_id "g60811";
C2190279	AUGUSTUS	exon	1	142	0.95	-	.	transcript_id "g60813.t1"; gene_id "g60813";
C2190279	AUGUSTUS	CDS	24	142	.	-	2	transcript_id "g60813.t1"; gene_id "g60813";
C2192277	AUGUSTUS	CDS	9	143	0.58	+	0	transcript_id "g60814.t1"; gene_id "g60814";
C2193207	AUGUSTUS	CDS	1	143	0.95	-	0	transcript_id "g60815.t1"; gene_id "g60815";
C2193269	AUGUSTUS	exon	1	143	0.22	+	.	transcript_id "g60816.t1"; gene_id "g60816";
C2193269	AUGUSTUS	CDS	1	131	.	+	2	transcript_id "g60816.t1"; gene_id "g60816";
C2193767	AUGUSTUS	exon	1	112	0.55	+	.	transcript_id "g60817.t1"; gene_id "g60817";
C2193767	AUGUSTUS	CDS	1	83	.	+	2	transcript_id "g60817.t1"; gene_id "g60817";
C2193849	AUGUSTUS	exon	1	143	0.83	-	.	transcript_id "g60818.t1"; gene_id "g60818";
C2193849	AUGUSTUS	CDS	6	143	.	-	0	transcript_id "g60818.t1"; gene_id "g60818";
C2194305	AUGUSTUS	exon	1	143	0.96	-	.	transcript_id "g60819.t1"; gene_id "g60819";
C2194305	AUGUSTUS	CDS	3	143	.	-	0	transcript_id "g60819.t1"; gene_id "g60819";
C2194821	AUGUSTUS	exon	1	143	0.99	-	.	transcript_id "g60820.t1"; gene_id "g60820";
C2194821	AUGUSTUS	CDS	24	143	.	-	0	transcript_id "g60820.t1"; gene_id "g60820";
C2195047	AUGUSTUS	exon	1	96	0.54	+	.	transcript_id "g60821.t1"; gene_id "g60821";
C2195047	AUGUSTUS	CDS	1	65	.	+	2	transcript_id "g60821.t1"; gene_id "g60821";
C2195421	AUGUSTUS	CDS	1	143	1	-	0	transcript_id "g60822.t1"; gene_id "g60822";
C2195637	AUGUSTUS	CDS	11	143	0.4	+	0	transcript_id "g60823.t1"; gene_id "g60823";
C2196903	AUGUSTUS	CDS	17	144	0.49	+	2	transcript_id "g60824.t1"; gene_id "g60824";
C2197352	AUGUSTUS	exon	1	144	1	-	.	transcript_id "g60825.t1"; gene_id "g60825";
C2197352	AUGUSTUS	CDS	10	144	.	-	0	transcript_id "g60825.t1"; gene_id "g60825";
C2197472	AUGUSTUS	CDS	4	144	0.78	+	0	transcript_id "g60826.t1"; gene_id "g60826";
C2197664	AUGUSTUS	exon	47	121	0.37	+	.	transcript_id "g60827.t1"; gene_id "g60827";
C2197664	AUGUSTUS	CDS	47	93	.	+	2	transcript_id "g60827.t1"; gene_id "g60827";
C2198914	AUGUSTUS	exon	16	95	0.65	-	.	transcript_id "g60828.t1"; gene_id "g60828";
C2198914	AUGUSTUS	CDS	16	68	.	-	0	transcript_id "g60828.t1"; gene_id "g60828";
C2199280	AUGUSTUS	CDS	1	144	0.97	-	0	transcript_id "g60829.t1"; gene_id "g60829";
C2199396	AUGUSTUS	exon	9	144	0.84	+	.	transcript_id "g60830.t1"; gene_id "g60830";
C2199396	AUGUSTUS	CDS	40	144	.	+	0	transcript_id "g60830.t1"; gene_id "g60830";
C2200460	AUGUSTUS	exon	7	95	0.52	-	.	transcript_id "g60831.t1"; gene_id "g60831";
C2200460	AUGUSTUS	CDS	7	67	.	-	0	transcript_id "g60831.t1"; gene_id "g60831";
C2201760	AUGUSTUS	CDS	1	145	0.5	+	0	transcript_id "g60832.t1"; gene_id "g60832";
C2204014	AUGUSTUS	CDS	1	145	0.42	+	1	transcript_id "g60833.t1"; gene_id "g60833";
C2204016	AUGUSTUS	CDS	1	145	0.42	+	1	transcript_id "g60834.t1"; gene_id "g60834";
C2204448	AUGUSTUS	exon	1	145	0.9	-	.	transcript_id "g60835.t1"; gene_id "g60835";
C2204448	AUGUSTUS	CDS	5	145	.	-	0	transcript_id "g60835.t1"; gene_id "g60835";
C2204696	AUGUSTUS	exon	1	145	0.96	-	.	transcript_id "g60836.t1"; gene_id "g60836";
C2204696	AUGUSTUS	CDS	16	145	.	-	1	transcript_id "g60836.t1"; gene_id "g60836";
C2205276	AUGUSTUS	exon	1	145	0.94	-	.	transcript_id "g60837.t1"; gene_id "g60837";
C2205276	AUGUSTUS	CDS	13	145	.	-	1	transcript_id "g60837.t1"; gene_id "g60837";
C2205356	AUGUSTUS	CDS	26	145	0.67	-	0	transcript_id "g60838.t1"; gene_id "g60838";
C2205848	AUGUSTUS	CDS	1	145	0.95	+	1	transcript_id "g60839.t1"; gene_id "g60839";
C2206552	AUGUSTUS	exon	1	95	0.67	-	.	transcript_id "g60840.t1"; gene_id "g60840";
C2206552	AUGUSTUS	CDS	1	44	.	-	0	transcript_id "g60840.t1"; gene_id "g60840";
C2207684	AUGUSTUS	exon	8	95	0.43	-	.	transcript_id "g60841.t1"; gene_id "g60841";
C2207684	AUGUSTUS	CDS	8	68	.	-	0	transcript_id "g60841.t1"; gene_id "g60841";
C2207810	AUGUSTUS	exon	1	130	0.61	+	.	transcript_id "g60842.t1"; gene_id "g60842";
C2207810	AUGUSTUS	CDS	1	101	.	+	2	transcript_id "g60842.t1"; gene_id "g60842";
C2207838	AUGUSTUS	exon	1	146	0.99	-	.	transcript_id "g60843.t1"; gene_id "g60843";
C2207838	AUGUSTUS	CDS	131	146	.	-	1	transcript_id "g60843.t1"; gene_id "g60843";
C2208556	AUGUSTUS	CDS	1	136	0.98	-	0	transcript_id "g60844.t1"; gene_id "g60844";
C2208754	AUGUSTUS	CDS	1	146	0.31	+	1	transcript_id "g60845.t1"; gene_id "g60845";
C2211500	AUGUSTUS	CDS	1	147	0.82	+	0	transcript_id "g60846.t1"; gene_id "g60846";
C2211880	AUGUSTUS	exon	1	147	0.76	-	.	transcript_id "g60847.t1"; gene_id "g60847";
C2211880	AUGUSTUS	CDS	28	147	.	-	0	transcript_id "g60847.t1"; gene_id "g60847";
C2212338	AUGUSTUS	CDS	7	147	0.25	-	0	transcript_id "g60848.t1"; gene_id "g60848";
C2212984	AUGUSTUS	CDS	7	147	0.67	+	0	transcript_id "g60849.t1"; gene_id "g60849";
C2213266	AUGUSTUS	exon	1	147	0.88	-	.	transcript_id "g60850.t1"; gene_id "g60850";
C2213266	AUGUSTUS	CDS	4	147	.	-	0	transcript_id "g60850.t1"; gene_id "g60850";
C2213304	AUGUSTUS	CDS	8	147	0.78	+	0	transcript_id "g60851.t1"; gene_id "g60851";
C2215636	AUGUSTUS	CDS	10	147	0.52	+	0	transcript_id "g60853.t1"; gene_id "g60853";
C2215638	AUGUSTUS	CDS	10	147	0.69	+	0	transcript_id "g60852.t1"; gene_id "g60852";
C2217004	AUGUSTUS	exon	1	138	0.91	-	.	transcript_id "g60855.t1"; gene_id "g60855";
C2217004	AUGUSTUS	CDS	127	138	.	-	0	transcript_id "g60855.t1"; gene_id "g60855";
C2217532	AUGUSTUS	CDS	1	148	0.42	+	2	transcript_id "g60854.t1"; gene_id "g60854";
C2218290	AUGUSTUS	CDS	6	148	0.9	+	0	transcript_id "g60856.t1"; gene_id "g60856";
C2218308	AUGUSTUS	exon	1	148	0.85	-	.	transcript_id "g60857.t1"; gene_id "g60857";
C2218308	AUGUSTUS	CDS	24	148	.	-	2	transcript_id "g60857.t1"; gene_id "g60857";
C2218392	AUGUSTUS	CDS	16	148	0.81	+	0	transcript_id "g60858.t1"; gene_id "g60858";
C2219064	AUGUSTUS	CDS	1	148	0.52	+	0	transcript_id "g60859.t1"; gene_id "g60859";
C2219250	AUGUSTUS	CDS	13	148	0.61	+	0	transcript_id "g60860.t1"; gene_id "g60860";
C2219502	AUGUSTUS	CDS	1	148	0.99	+	1	transcript_id "g60861.t1"; gene_id "g60861";
C2219606	AUGUSTUS	CDS	14	148	0.66	+	0	transcript_id "g60862.t1"; gene_id "g60862";
C2221946	AUGUSTUS	CDS	1	149	0.54	-	2	transcript_id "g60863.t1"; gene_id "g60863";
C2221972	AUGUSTUS	CDS	20	149	0.68	+	0	transcript_id "g60864.t1"; gene_id "g60864";
C2222258	AUGUSTUS	exon	1	111	0.69	-	.	transcript_id "g60865.t1"; gene_id "g60865";
C2222258	AUGUSTUS	CDS	13	111	.	-	0	transcript_id "g60865.t1"; gene_id "g60865";
C2223350	AUGUSTUS	CDS	1	149	0.65	+	1	transcript_id "g60866.t1"; gene_id "g60866";
C2224564	AUGUSTUS	CDS	14	149	0.92	+	0	transcript_id "g60867.t1"; gene_id "g60867";
C2224880	AUGUSTUS	CDS	22	149	0.52	+	0	transcript_id "g60868.t1"; gene_id "g60868";
C2226888	AUGUSTUS	CDS	16	150	0.88	+	0	transcript_id "g60869.t1"; gene_id "g60869";
C2227162	AUGUSTUS	exon	7	95	0.42	-	.	transcript_id "g60870.t1"; gene_id "g60870";
C2227162	AUGUSTUS	CDS	7	12	.	-	0	transcript_id "g60870.t1"; gene_id "g60870";
C2227823	AUGUSTUS	exon	1	145	0.29	+	.	transcript_id "g60871.t1"; gene_id "g60871";
C2227823	AUGUSTUS	CDS	1	113	.	+	2	transcript_id "g60871.t1"; gene_id "g60871";
C2228501	AUGUSTUS	exon	1	91	0.55	+	.	transcript_id "g60872.t1"; gene_id "g60872";
C2228501	AUGUSTUS	CDS	1	64	.	+	1	transcript_id "g60872.t1"; gene_id "g60872";
C2231709	AUGUSTUS	exon	1	151	0.88	-	.	transcript_id "g60873.t1"; gene_id "g60873";
C2231709	AUGUSTUS	CDS	13	151	.	-	1	transcript_id "g60873.t1"; gene_id "g60873";
C2233369	AUGUSTUS	CDS	5	151	0.39	+	0	transcript_id "g60874.t1"; gene_id "g60874";
C2233997	AUGUSTUS	CDS	11	151	0.33	+	0	transcript_id "g60875.t1"; gene_id "g60875";
C2234499	AUGUSTUS	exon	1	105	0.56	-	.	transcript_id "g60876.t1"; gene_id "g60876";
C2234499	AUGUSTUS	CDS	1	77	.	-	0	transcript_id "g60876.t1"; gene_id "g60876";
C2235073	AUGUSTUS	CDS	6	151	0.52	+	0	transcript_id "g60877.t1"; gene_id "g60877";
C2235781	AUGUSTUS	exon	1	152	0.34	+	.	transcript_id "g60878.t1"; gene_id "g60878";
C2235781	AUGUSTUS	CDS	1	149	.	+	2	transcript_id "g60878.t1"; gene_id "g60878";
C2238869	AUGUSTUS	CDS	1	152	0.68	+	1	transcript_id "g60879.t1"; gene_id "g60879";
C2240437	AUGUSTUS	exon	1	144	0.24	+	.	transcript_id "g60880.t1"; gene_id "g60880";
C2240437	AUGUSTUS	CDS	1	55	.	+	1	transcript_id "g60880.t1"; gene_id "g60880";
C2242417	AUGUSTUS	exon	1	105	0.63	-	.	transcript_id "g60881.t1"; gene_id "g60881";
C2242417	AUGUSTUS	CDS	1	75	.	-	0	transcript_id "g60881.t1"; gene_id "g60881";
C2243025	AUGUSTUS	CDS	22	153	0.55	+	0	transcript_id "g60882.t1"; gene_id "g60882";
C2243419	AUGUSTUS	exon	56	148	0.82	+	.	transcript_id "g60883.t1"; gene_id "g60883";
C2243419	AUGUSTUS	CDS	56	122	.	+	1	transcript_id "g60883.t1"; gene_id "g60883";
C2245273	AUGUSTUS	CDS	11	154	0.68	+	0	transcript_id "g60884.t1"; gene_id "g60884";
C2246193	AUGUSTUS	CDS	7	154	0.72	-	1	transcript_id "g60885.t1"; gene_id "g60885";
C2246445	AUGUSTUS	exon	1	154	0.6	+	.	transcript_id "g60886.t1"; gene_id "g60886";
C2246445	AUGUSTUS	CDS	1	147	.	+	0	transcript_id "g60886.t1"; gene_id "g60886";
C2246521	AUGUSTUS	CDS	11	154	0.46	+	0	transcript_id "g60887.t1"; gene_id "g60887";
C2246817	AUGUSTUS	exon	1	154	1	-	.	transcript_id "g60888.t1"; gene_id "g60888";
C2246817	AUGUSTUS	CDS	40	154	.	-	1	transcript_id "g60888.t1"; gene_id "g60888";
C2247173	AUGUSTUS	exon	1	140	0.77	+	.	transcript_id "g60889.t1"; gene_id "g60889";
C2247173	AUGUSTUS	CDS	1	109	.	+	1	transcript_id "g60889.t1"; gene_id "g60889";
C2247199	AUGUSTUS	exon	1	154	0.74	-	.	transcript_id "g60890.t1"; gene_id "g60890";
C2247199	AUGUSTUS	CDS	26	154	.	-	0	transcript_id "g60890.t1"; gene_id "g60890";
C2248107	AUGUSTUS	exon	1	150	0.82	+	.	transcript_id "g60891.t1"; gene_id "g60891";
C2248107	AUGUSTUS	CDS	1	128	.	+	2	transcript_id "g60891.t1"; gene_id "g60891";
C2248213	AUGUSTUS	exon	1	154	0.75	+	.	transcript_id "g60892.t1"; gene_id "g60892";
C2248213	AUGUSTUS	CDS	1	136	.	+	1	transcript_id "g60892.t1"; gene_id "g60892";
C2248453	AUGUSTUS	CDS	11	154	0.59	+	0	transcript_id "g60893.t1"; gene_id "g60893";
C2248733	AUGUSTUS	exon	13	105	0.58	-	.	transcript_id "g60894.t1"; gene_id "g60894";
C2248733	AUGUSTUS	CDS	13	66	.	-	0	transcript_id "g60894.t1"; gene_id "g60894";
C2248771	AUGUSTUS	CDS	1	154	0.67	-	1	transcript_id "g60895.t1"; gene_id "g60895";
C2249217	AUGUSTUS	CDS	11	154	0.5	+	0	transcript_id "g60896.t1"; gene_id "g60896";
C2249327	AUGUSTUS	CDS	22	154	0.7	+	0	transcript_id "g60897.t1"; gene_id "g60897";
C2250783	AUGUSTUS	exon	7	105	0.46	-	.	transcript_id "g60898.t1"; gene_id "g60898";
C2250783	AUGUSTUS	CDS	7	80	.	-	0	transcript_id "g60898.t1"; gene_id "g60898";
C2250951	AUGUSTUS	exon	32	105	0.74	-	.	transcript_id "g60899.t1"; gene_id "g60899";
C2250951	AUGUSTUS	CDS	32	79	.	-	0	transcript_id "g60899.t1"; gene_id "g60899";
C2251643	AUGUSTUS	CDS	16	155	0.83	+	0	transcript_id "g60900.t1"; gene_id "g60900";
C2255255	AUGUSTUS	exon	1	156	1	-	.	transcript_id "g60901.t1"; gene_id "g60901";
C2255255	AUGUSTUS	CDS	30	156	.	-	1	transcript_id "g60901.t1"; gene_id "g60901";
C2255305	AUGUSTUS	exon	9	105	0.5	-	.	transcript_id "g60902.t1"; gene_id "g60902";
C2255305	AUGUSTUS	CDS	9	76	.	-	0	transcript_id "g60902.t1"; gene_id "g60902";
C2255553	AUGUSTUS	exon	7	105	0.5	-	.	transcript_id "g60903.t1"; gene_id "g60903";
C2255553	AUGUSTUS	CDS	7	64	.	-	0	transcript_id "g60903.t1"; gene_id "g60903";
C2258931	AUGUSTUS	exon	1	147	0.99	-	.	transcript_id "g60904.t1"; gene_id "g60904";
C2258931	AUGUSTUS	CDS	34	147	.	-	0	transcript_id "g60904.t1"; gene_id "g60904";
C2259877	AUGUSTUS	exon	1	155	0.51	+	.	transcript_id "g60905.t1"; gene_id "g60905";
C2259877	AUGUSTUS	CDS	1	87	.	+	0	transcript_id "g60905.t1"; gene_id "g60905";
C2260835	AUGUSTUS	exon	1	130	0.46	+	.	transcript_id "g60906.t1"; gene_id "g60906";
C2260835	AUGUSTUS	CDS	1	94	.	+	1	transcript_id "g60906.t1"; gene_id "g60906";
C2260927	AUGUSTUS	CDS	14	157	0.98	+	0	transcript_id "g60907.t1"; gene_id "g60907";
C2260939	AUGUSTUS	exon	1	120	0.36	+	.	transcript_id "g60908.t1"; gene_id "g60908";
C2260939	AUGUSTUS	CDS	1	80	.	+	2	transcript_id "g60908.t1"; gene_id "g60908";
C2260959	AUGUSTUS	CDS	17	157	0.73	+	0	transcript_id "g60909.t1"; gene_id "g60909";
C2261217	AUGUSTUS	CDS	14	157	0.95	+	0	transcript_id "g60910.t1"; gene_id "g60910";
C2261219	AUGUSTUS	CDS	14	157	0.98	+	0	transcript_id "g60911.t1"; gene_id "g60911";
C2262097	AUGUSTUS	CDS	1	157	0.83	+	1	transcript_id "g60912.t1"; gene_id "g60912";
C2262487	AUGUSTUS	exon	16	85	0.51	-	.	transcript_id "g60913.t1"; gene_id "g60913";
C2262487	AUGUSTUS	CDS	16	58	.	-	0	transcript_id "g60913.t1"; gene_id "g60913";
C2264615	AUGUSTUS	CDS	6	158	0.71	+	0	transcript_id "g60914.t1"; gene_id "g60914";
C2265033	AUGUSTUS	exon	1	150	0.88	+	.	transcript_id "g60915.t1"; gene_id "g60915";
C2265033	AUGUSTUS	CDS	1	119	.	+	2	transcript_id "g60915.t1"; gene_id "g60915";
C2265221	AUGUSTUS	CDS	19	158	0.92	+	0	transcript_id "g60916.t1"; gene_id "g60916";
C2266143	AUGUSTUS	CDS	1	158	0.81	-	2	transcript_id "g60917.t1"; gene_id "g60917";
C2268527	AUGUSTUS	CDS	23	158	0.66	+	0	transcript_id "g60918.t1"; gene_id "g60918";
C2269483	AUGUSTUS	CDS	1	159	0.37	-	0	transcript_id "g60919.t1"; gene_id "g60919";
C2269989	AUGUSTUS	exon	18	159	0.93	+	.	transcript_id "g60920.t1"; gene_id "g60920";
C2269989	AUGUSTUS	CDS	18	156	.	+	1	transcript_id "g60920.t1"; gene_id "g60920";
C2270985	AUGUSTUS	exon	1	159	0.86	-	.	transcript_id "g60921.t1"; gene_id "g60921";
C2270985	AUGUSTUS	CDS	19	159	.	-	0	transcript_id "g60921.t1"; gene_id "g60921";
C2271507	AUGUSTUS	exon	1	150	0.36	+	.	transcript_id "g60922.t1"; gene_id "g60922";
C2271507	AUGUSTUS	CDS	1	71	.	+	2	transcript_id "g60922.t1"; gene_id "g60922";
C2271621	AUGUSTUS	exon	1	159	0.76	-	.	transcript_id "g60923.t1"; gene_id "g60923";
C2271621	AUGUSTUS	CDS	140	159	.	-	2	transcript_id "g60923.t1"; gene_id "g60923";
C2271831	AUGUSTUS	CDS	1	159	0.89	+	0	transcript_id "g60924.t1"; gene_id "g60924";
C2272491	AUGUSTUS	CDS	1	159	0.98	-	0	transcript_id "g60925.t1"; gene_id "g60925";
C2272493	AUGUSTUS	CDS	1	159	0.96	-	0	transcript_id "g60926.t1"; gene_id "g60926";
C2276043	AUGUSTUS	CDS	23	160	0.55	+	0	transcript_id "g60927.t1"; gene_id "g60927";
C2276257	AUGUSTUS	CDS	14	160	0.84	+	0	transcript_id "g60928.t1"; gene_id "g60928";
C2276403	AUGUSTUS	CDS	1	160	0.81	+	0	transcript_id "g60929.t1"; gene_id "g60929";
C2276867	AUGUSTUS	CDS	1	150	0.27	-	2	transcript_id "g60930.t1"; gene_id "g60930";
C2277167	AUGUSTUS	CDS	11	160	0.71	+	0	transcript_id "g60931.t1"; gene_id "g60931";
C2277249	AUGUSTUS	exon	1	147	0.29	+	.	transcript_id "g60932.t1"; gene_id "g60932";
C2277249	AUGUSTUS	CDS	1	76	.	+	1	transcript_id "g60932.t1"; gene_id "g60932";
C2277653	AUGUSTUS	CDS	13	160	1	+	0	transcript_id "g60933.t1"; gene_id "g60933";
C2277869	AUGUSTUS	CDS	13	160	0.98	+	0	transcript_id "g60934.t1"; gene_id "g60934";
C2278579	AUGUSTUS	CDS	20	160	0.98	+	0	transcript_id "g60935.t1"; gene_id "g60935";
C2278739	AUGUSTUS	CDS	15	160	0.94	+	0	transcript_id "g60936.t1"; gene_id "g60936";
C2278761	AUGUSTUS	exon	1	160	0.99	-	.	transcript_id "g60937.t1"; gene_id "g60937";
C2278761	AUGUSTUS	CDS	12	160	.	-	2	transcript_id "g60937.t1"; gene_id "g60937";
C2279273	AUGUSTUS	exon	1	105	0.48	-	.	transcript_id "g60938.t1"; gene_id "g60938";
C2279273	AUGUSTUS	CDS	1	64	.	-	0	transcript_id "g60938.t1"; gene_id "g60938";
C2279581	AUGUSTUS	exon	1	161	0.98	-	.	transcript_id "g60939.t1"; gene_id "g60939";
C2279581	AUGUSTUS	CDS	27	161	.	-	0	transcript_id "g60939.t1"; gene_id "g60939";
C2280175	AUGUSTUS	exon	7	115	0.85	-	.	transcript_id "g60940.t1"; gene_id "g60940";
C2280175	AUGUSTUS	CDS	7	78	.	-	0	transcript_id "g60940.t1"; gene_id "g60940";
C2280485	AUGUSTUS	CDS	2	161	0.97	+	0	transcript_id "g60941.t1"; gene_id "g60941";
C2281015	AUGUSTUS	exon	7	143	0.79	-	.	transcript_id "g60942.t1"; gene_id "g60942";
C2281015	AUGUSTUS	CDS	7	119	.	-	0	transcript_id "g60942.t1"; gene_id "g60942";
C2281237	AUGUSTUS	CDS	1	161	0.94	-	0	transcript_id "g60943.t1"; gene_id "g60943";
C2281885	AUGUSTUS	CDS	1	161	0.72	+	0	transcript_id "g60944.t1"; gene_id "g60944";
C2282127	AUGUSTUS	CDS	1	161	0.3	+	2	transcript_id "g60945.t1"; gene_id "g60945";
C2282741	AUGUSTUS	CDS	7	161	0.95	-	1	transcript_id "g60946.t1"; gene_id "g60946";
C2282853	AUGUSTUS	CDS	1	161	0.99	-	0	transcript_id "g60947.t1"; gene_id "g60947";
C2283033	AUGUSTUS	exon	1	160	0.56	+	.	transcript_id "g60948.t1"; gene_id "g60948";
C2283033	AUGUSTUS	CDS	1	126	.	+	0	transcript_id "g60948.t1"; gene_id "g60948";
C2284575	AUGUSTUS	exon	23	157	0.62	+	.	transcript_id "g60949.t1"; gene_id "g60949";
C2284575	AUGUSTUS	CDS	23	137	.	+	1	transcript_id "g60949.t1"; gene_id "g60949";
C2285159	AUGUSTUS	exon	1	150	0.92	+	.	transcript_id "g60950.t1"; gene_id "g60950";
C2285159	AUGUSTUS	CDS	1	76	.	+	1	transcript_id "g60950.t1"; gene_id "g60950";
C2285861	AUGUSTUS	exon	45	157	0.65	+	.	transcript_id "g60951.t1"; gene_id "g60951";
C2285861	AUGUSTUS	CDS	79	157	.	+	0	transcript_id "g60951.t1"; gene_id "g60951";
C2285887	AUGUSTUS	CDS	1	162	0.86	-	2	transcript_id "g60952.t1"; gene_id "g60952";
C2285941	AUGUSTUS	CDS	1	152	0.38	-	2	transcript_id "g60953.t1"; gene_id "g60953";
C2286055	AUGUSTUS	exon	1	162	0.99	-	.	transcript_id "g60954.t1"; gene_id "g60954";
C2286055	AUGUSTUS	CDS	20	162	.	-	2	transcript_id "g60954.t1"; gene_id "g60954";
C2286245	AUGUSTUS	exon	7	115	0.86	-	.	transcript_id "g60955.t1"; gene_id "g60955";
C2286245	AUGUSTUS	CDS	7	70	.	-	0	transcript_id "g60955.t1"; gene_id "g60955";
C2287223	AUGUSTUS	CDS	1	162	0.57	+	0	transcript_id "g60956.t1"; gene_id "g60956";
C2287235	AUGUSTUS	CDS	10	162	0.6	+	0	transcript_id "g60957.t1"; gene_id "g60957";
C2287949	AUGUSTUS	exon	15	115	0.73	-	.	transcript_id "g60958.t1"; gene_id "g60958";
C2287949	AUGUSTUS	CDS	15	82	.	-	0	transcript_id "g60958.t1"; gene_id "g60958";
C2287951	AUGUSTUS	exon	15	115	0.9	-	.	transcript_id "g60959.t1"; gene_id "g60959";
C2287951	AUGUSTUS	CDS	15	82	.	-	0	transcript_id "g60959.t1"; gene_id "g60959";
C2288055	AUGUSTUS	CDS	10	157	0.86	+	0	transcript_id "g60960.t1"; gene_id "g60960";
C2288153	AUGUSTUS	CDS	1	162	0.75	+	0	transcript_id "g60961.t1"; gene_id "g60961";
C2288491	AUGUSTUS	exon	1	137	0.37	+	.	transcript_id "g60962.t1"; gene_id "g60962";
C2288491	AUGUSTUS	CDS	1	117	.	+	0	transcript_id "g60962.t1"; gene_id "g60962";
C2291147	AUGUSTUS	exon	1	163	1	-	.	transcript_id "g60963.t1"; gene_id "g60963";
C2291147	AUGUSTUS	CDS	52	163	.	-	1	transcript_id "g60963.t1"; gene_id "g60963";
C2291223	AUGUSTUS	exon	1	163	0.86	-	.	transcript_id "g60964.t1"; gene_id "g60964";
C2291223	AUGUSTUS	CDS	157	163	.	-	1	transcript_id "g60964.t1"; gene_id "g60964";
C2292439	AUGUSTUS	exon	1	163	0.79	-	.	transcript_id "g60965.t1"; gene_id "g60965";
C2292439	AUGUSTUS	CDS	50	163	.	-	0	transcript_id "g60965.t1"; gene_id "g60965";
C2293121	AUGUSTUS	CDS	1	163	0.11	+	1	transcript_id "g60966.t1"; gene_id "g60966";
C2293323	AUGUSTUS	CDS	15	163	0.9	+	0	transcript_id "g60967.t1"; gene_id "g60967";
C2293945	AUGUSTUS	CDS	16	163	0.62	+	0	transcript_id "g60968.t1"; gene_id "g60968";
C2296339	AUGUSTUS	CDS	19	164	0.9	+	0	transcript_id "g60969.t1"; gene_id "g60969";
C2296667	AUGUSTUS	CDS	1	164	0.35	+	2	transcript_id "g60970.t1"; gene_id "g60970";
C2296673	AUGUSTUS	exon	1	120	0.53	+	.	transcript_id "g60971.t1"; gene_id "g60971";
C2296673	AUGUSTUS	CDS	1	87	.	+	0	transcript_id "g60971.t1"; gene_id "g60971";
C2296781	AUGUSTUS	exon	1	164	0.84	-	.	transcript_id "g60972.t1"; gene_id "g60972";
C2296781	AUGUSTUS	CDS	8	164	.	-	1	transcript_id "g60972.t1"; gene_id "g60972";
C2296993	AUGUSTUS	exon	1	164	0.99	-	.	transcript_id "g60973.t1"; gene_id "g60973";
C2296993	AUGUSTUS	CDS	15	164	.	-	0	transcript_id "g60973.t1"; gene_id "g60973";
C2297523	AUGUSTUS	CDS	1	164	0.77	-	2	transcript_id "g60974.t1"; gene_id "g60974";
C2297527	AUGUSTUS	exon	1	115	0.99	-	.	transcript_id "g60976.t1"; gene_id "g60976";
C2297527	AUGUSTUS	CDS	1	87	.	-	0	transcript_id "g60976.t1"; gene_id "g60976";
C2297529	AUGUSTUS	exon	1	115	1	-	.	transcript_id "g60975.t1"; gene_id "g60975";
C2297529	AUGUSTUS	CDS	1	87	.	-	0	transcript_id "g60975.t1"; gene_id "g60975";
C2297975	AUGUSTUS	CDS	9	164	0.67	+	0	transcript_id "g60977.t1"; gene_id "g60977";
C2298449	AUGUSTUS	CDS	23	28	0.69	+	0	transcript_id "g60978.t1"; gene_id "g60978";
C2298449	AUGUSTUS	CDS	75	164	0.69	+	0	transcript_id "g60978.t1"; gene_id "g60978";
C2298797	AUGUSTUS	exon	1	154	0.96	-	.	transcript_id "g60979.t1"; gene_id "g60979";
C2298797	AUGUSTUS	CDS	35	154	.	-	0	transcript_id "g60979.t1"; gene_id "g60979";
C2298827	AUGUSTUS	CDS	7	164	0.81	+	0	transcript_id "g60980.t1"; gene_id "g60980";
C2300227	AUGUSTUS	exon	1	146	0.55	+	.	transcript_id "g60981.t1"; gene_id "g60981";
C2300227	AUGUSTUS	CDS	1	90	.	+	0	transcript_id "g60981.t1"; gene_id "g60981";
C2300417	AUGUSTUS	CDS	38	165	0.22	-	1	transcript_id "g60982.t1"; gene_id "g60982";
C2301311	AUGUSTUS	exon	1	160	0.85	+	.	transcript_id "g60983.t1"; gene_id "g60983";
C2301311	AUGUSTUS	CDS	1	132	.	+	0	transcript_id "g60983.t1"; gene_id "g60983";
C2301321	AUGUSTUS	exon	7	95	0.43	-	.	transcript_id "g60984.t1"; gene_id "g60984";
C2301321	AUGUSTUS	CDS	7	63	.	-	0	transcript_id "g60984.t1"; gene_id "g60984";
C2301867	AUGUSTUS	CDS	1	165	0.54	+	0	transcript_id "g60985.t1"; gene_id "g60985";
C2302429	AUGUSTUS	exon	1	165	0.98	-	.	transcript_id "g60986.t1"; gene_id "g60986";
C2302429	AUGUSTUS	CDS	27	165	.	-	1	transcript_id "g60986.t1"; gene_id "g60986";
C2302965	AUGUSTUS	exon	1	153	0.91	+	.	transcript_id "g60987.t1"; gene_id "g60987";
C2302965	AUGUSTUS	CDS	1	96	.	+	0	transcript_id "g60987.t1"; gene_id "g60987";
C2303287	AUGUSTUS	exon	1	105	0.75	-	.	transcript_id "g60988.t1"; gene_id "g60988";
C2303287	AUGUSTUS	CDS	1	84	.	-	0	transcript_id "g60988.t1"; gene_id "g60988";
C2303289	AUGUSTUS	exon	1	105	0.5	-	.	transcript_id "g60989.t1"; gene_id "g60989";
C2303289	AUGUSTUS	CDS	1	84	.	-	0	transcript_id "g60989.t1"; gene_id "g60989";
C2305219	AUGUSTUS	exon	1	140	0.85	+	.	transcript_id "g60990.t1"; gene_id "g60990";
C2305219	AUGUSTUS	CDS	1	109	.	+	1	transcript_id "g60990.t1"; gene_id "g60990";
C2305805	AUGUSTUS	CDS	1	166	0.51	+	1	transcript_id "g60991.t1"; gene_id "g60991";
C2305821	AUGUSTUS	exon	1	150	0.69	+	.	transcript_id "g60992.t1"; gene_id "g60992";
C2305821	AUGUSTUS	CDS	1	117	.	+	0	transcript_id "g60992.t1"; gene_id "g60992";
C2306265	AUGUSTUS	exon	1	166	0.98	-	.	transcript_id "g60993.t1"; gene_id "g60993";
C2306265	AUGUSTUS	CDS	46	166	.	-	1	transcript_id "g60993.t1"; gene_id "g60993";
C2306309	AUGUSTUS	CDS	1	166	0.39	+	2	transcript_id "g60994.t1"; gene_id "g60994";
C2306339	AUGUSTUS	exon	1	166	0.83	-	.	transcript_id "g60995.t1"; gene_id "g60995";
C2306339	AUGUSTUS	CDS	27	166	.	-	2	transcript_id "g60995.t1"; gene_id "g60995";
C2307769	AUGUSTUS	CDS	2	166	0.72	+	0	transcript_id "g60996.t1"; gene_id "g60996";
C2307851	AUGUSTUS	CDS	7	166	0.99	+	0	transcript_id "g60997.t1"; gene_id "g60997";
C2308009	AUGUSTUS	exon	1	97	0.87	+	.	transcript_id "g61005.t1"; gene_id "g61005";
C2308009	AUGUSTUS	CDS	1	71	.	+	2	transcript_id "g61005.t1"; gene_id "g61005";
C2308135	AUGUSTUS	exon	1	150	0.81	+	.	transcript_id "g60998.t1"; gene_id "g60998";
C2308135	AUGUSTUS	CDS	1	127	.	+	1	transcript_id "g60998.t1"; gene_id "g60998";
C2308151	AUGUSTUS	exon	1	105	0.58	-	.	transcript_id "g61007.t1"; gene_id "g61007";
C2308151	AUGUSTUS	CDS	1	55	.	-	0	transcript_id "g61007.t1"; gene_id "g61007";
C2308175	AUGUSTUS	CDS	7	166	0.98	-	2	transcript_id "g60999.t1"; gene_id "g60999";
C2308387	AUGUSTUS	exon	7	95	0.26	-	.	transcript_id "g61000.t1"; gene_id "g61000";
C2308387	AUGUSTUS	CDS	7	54	.	-	0	transcript_id "g61000.t1"; gene_id "g61000";
C2308389	AUGUSTUS	exon	7	95	0.79	-	.	transcript_id "g61001.t1"; gene_id "g61001";
C2308389	AUGUSTUS	CDS	7	54	.	-	0	transcript_id "g61001.t1"; gene_id "g61001";
C2308423	AUGUSTUS	CDS	13	166	0.52	+	0	transcript_id "g61002.t1"; gene_id "g61002";
C2308481	AUGUSTUS	exon	1	166	0.82	-	.	transcript_id "g61006.t1"; gene_id "g61006";
C2308481	AUGUSTUS	CDS	158	166	.	-	0	transcript_id "g61006.t1"; gene_id "g61006";
C2308557	AUGUSTUS	CDS	20	166	0.84	+	0	transcript_id "g61003.t1"; gene_id "g61003";
C2308559	AUGUSTUS	CDS	20	166	0.86	+	0	transcript_id "g61004.t1"; gene_id "g61004";
C2309025	AUGUSTUS	exon	1	166	0.89	-	.	transcript_id "g61008.t1"; gene_id "g61008";
C2309025	AUGUSTUS	CDS	23	166	.	-	0	transcript_id "g61008.t1"; gene_id "g61008";
C2309267	AUGUSTUS	CDS	10	166	0.64	+	0	transcript_id "g61009.t1"; gene_id "g61009";
C2309819	AUGUSTUS	CDS	11	166	0.52	+	0	transcript_id "g61010.t1"; gene_id "g61010";
C2310667	AUGUSTUS	CDS	7	134	0.61	+	0	transcript_id "g61011.t1"; gene_id "g61011";
C2311427	AUGUSTUS	CDS	5	167	0.38	+	0	transcript_id "g61012.t1"; gene_id "g61012";
C2311631	AUGUSTUS	exon	1	141	0.53	+	.	transcript_id "g61013.t1"; gene_id "g61013";
C2311631	AUGUSTUS	CDS	1	87	.	+	0	transcript_id "g61013.t1"; gene_id "g61013";
C2311793	AUGUSTUS	exon	1	167	0.54	-	.	transcript_id "g61014.t1"; gene_id "g61014";
C2311793	AUGUSTUS	CDS	8	167	.	-	1	transcript_id "g61014.t1"; gene_id "g61014";
C2312299	AUGUSTUS	CDS	9	167	0.15	-	0	transcript_id "g61015.t1"; gene_id "g61015";
C2312445	AUGUSTUS	exon	18	123	0.66	+	.	transcript_id "g61016.t1"; gene_id "g61016";
C2312445	AUGUSTUS	CDS	18	90	.	+	1	transcript_id "g61016.t1"; gene_id "g61016";
C2312635	AUGUSTUS	exon	1	167	0.85	-	.	transcript_id "g61017.t1"; gene_id "g61017";
C2312635	AUGUSTUS	CDS	4	167	.	-	2	transcript_id "g61017.t1"; gene_id "g61017";
C2312667	AUGUSTUS	exon	1	167	0.91	-	.	transcript_id "g61018.t1"; gene_id "g61018";
C2312667	AUGUSTUS	CDS	35	167	.	-	1	transcript_id "g61018.t1"; gene_id "g61018";
C2312745	AUGUSTUS	CDS	17	167	0.56	+	0	transcript_id "g61019.t1"; gene_id "g61019";
C2313035	AUGUSTUS	CDS	13	167	0.87	+	0	transcript_id "g61020.t1"; gene_id "g61020";
C2313281	AUGUSTUS	exon	1	75	0.18	-	.	transcript_id "g61021.t1"; gene_id "g61021";
C2313281	AUGUSTUS	CDS	1	38	.	-	0	transcript_id "g61021.t1"; gene_id "g61021";
C2313749	AUGUSTUS	exon	1	105	0.74	-	.	transcript_id "g61022.t1"; gene_id "g61022";
C2313749	AUGUSTUS	CDS	1	78	.	-	0	transcript_id "g61022.t1"; gene_id "g61022";
C2314119	AUGUSTUS	CDS	11	162	0.38	+	0	transcript_id "g61023.t1"; gene_id "g61023";
C2314299	AUGUSTUS	exon	1	167	0.99	-	.	transcript_id "g61024.t1"; gene_id "g61024";
C2314299	AUGUSTUS	CDS	19	167	.	-	2	transcript_id "g61024.t1"; gene_id "g61024";
C2314517	AUGUSTUS	exon	1	167	0.91	-	.	transcript_id "g61025.t1"; gene_id "g61025";
C2314517	AUGUSTUS	CDS	4	167	.	-	2	transcript_id "g61025.t1"; gene_id "g61025";
C2314769	AUGUSTUS	exon	1	167	0.78	-	.	transcript_id "g61026.t1"; gene_id "g61026";
C2314769	AUGUSTUS	CDS	57	167	.	-	0	transcript_id "g61026.t1"; gene_id "g61026";
C2315971	AUGUSTUS	CDS	1	168	0.41	+	0	transcript_id "g61027.t1"; gene_id "g61027";
C2316387	AUGUSTUS	CDS	7	168	0.52	-	1	transcript_id "g61028.t1"; gene_id "g61028";
C2316517	AUGUSTUS	exon	1	168	0.61	+	.	transcript_id "g61029.t1"; gene_id "g61029";
C2316517	AUGUSTUS	CDS	1	162	.	+	0	transcript_id "g61029.t1"; gene_id "g61029";
C2316519	AUGUSTUS	exon	1	168	0.87	+	.	transcript_id "g61030.t1"; gene_id "g61030";
C2316519	AUGUSTUS	CDS	1	162	.	+	0	transcript_id "g61030.t1"; gene_id "g61030";
C2316521	AUGUSTUS	exon	1	140	0.31	+	.	transcript_id "g61031.t1"; gene_id "g61031";
C2316521	AUGUSTUS	CDS	1	81	.	+	0	transcript_id "g61031.t1"; gene_id "g61031";
C2316679	AUGUSTUS	exon	31	85	0.36	-	.	transcript_id "g61032.t1"; gene_id "g61032";
C2316679	AUGUSTUS	CDS	31	54	.	-	0	transcript_id "g61032.t1"; gene_id "g61032";
C2316853	AUGUSTUS	exon	22	153	0.93	+	.	transcript_id "g61033.t1"; gene_id "g61033";
C2316853	AUGUSTUS	CDS	22	129	.	+	0	transcript_id "g61033.t1"; gene_id "g61033";
C2316957	AUGUSTUS	exon	1	153	0.59	+	.	transcript_id "g61034.t1"; gene_id "g61034";
C2316957	AUGUSTUS	CDS	1	92	.	+	2	transcript_id "g61034.t1"; gene_id "g61034";
C2318163	AUGUSTUS	CDS	4	168	0.99	+	0	transcript_id "g61035.t1"; gene_id "g61035";
C2318559	AUGUSTUS	exon	1	160	0.3	+	.	transcript_id "g61036.t1"; gene_id "g61036";
C2318559	AUGUSTUS	CDS	1	79	.	+	1	transcript_id "g61036.t1"; gene_id "g61036";
C2319052	AUGUSTUS	CDS	1	146	0.68	-	0	transcript_id "g61037.t1"; gene_id "g61037";
C2319054	AUGUSTUS	CDS	1	146	0.68	-	0	transcript_id "g61038.t1"; gene_id "g61038";
C2319570	AUGUSTUS	CDS	1	168	0.54	+	0	transcript_id "g61039.t1"; gene_id "g61039";
C2319634	AUGUSTUS	CDS	1	168	0.53	+	0	transcript_id "g61040.t1"; gene_id "g61040";
C2319672	AUGUSTUS	exon	1	168	0.36	+	.	transcript_id "g61041.t1"; gene_id "g61041";
C2319672	AUGUSTUS	CDS	1	162	.	+	0	transcript_id "g61041.t1"; gene_id "g61041";
C2319796	AUGUSTUS	CDS	1	169	0.51	+	0	transcript_id "g61042.t1"; gene_id "g61042";
C2320520	AUGUSTUS	CDS	1	169	0.7	+	1	transcript_id "g61043.t1"; gene_id "g61043";
C2320522	AUGUSTUS	CDS	1	169	0.58	+	1	transcript_id "g61044.t1"; gene_id "g61044";
C2320814	AUGUSTUS	CDS	1	169	0.51	-	1	transcript_id "g61045.t1"; gene_id "g61045";
C2321100	AUGUSTUS	exon	1	169	0.8	-	.	transcript_id "g61046.t1"; gene_id "g61046";
C2321100	AUGUSTUS	CDS	21	169	.	-	2	transcript_id "g61046.t1"; gene_id "g61046";
C2321216	AUGUSTUS	exon	1	117	0.63	-	.	transcript_id "g61047.t1"; gene_id "g61047";
C2321216	AUGUSTUS	CDS	49	117	.	-	0	transcript_id "g61047.t1"; gene_id "g61047";
C2322050	AUGUSTUS	CDS	12	169	0.86	-	2	transcript_id "g61048.t1"; gene_id "g61048";
C2322224	AUGUSTUS	CDS	1	169	0.91	-	2	transcript_id "g61050.t1"; gene_id "g61050";
C2322240	AUGUSTUS	CDS	1	169	0.49	+	0	transcript_id "g61049.t1"; gene_id "g61049";
C2322622	AUGUSTUS	CDS	11	164	0.96	+	0	transcript_id "g61051.t1"; gene_id "g61051";
C2322996	AUGUSTUS	exon	13	169	0.91	+	.	transcript_id "g61052.t1"; gene_id "g61052";
C2322996	AUGUSTUS	CDS	13	166	.	+	1	transcript_id "g61052.t1"; gene_id "g61052";
C2322998	AUGUSTUS	exon	13	169	0.9	+	.	transcript_id "g61053.t1"; gene_id "g61053";
C2322998	AUGUSTUS	CDS	13	166	.	+	1	transcript_id "g61053.t1"; gene_id "g61053";
C2323130	AUGUSTUS	CDS	11	169	0.58	+	0	transcript_id "g61054.t1"; gene_id "g61054";
C2323214	AUGUSTUS	exon	1	161	0.92	+	.	transcript_id "g61055.t1"; gene_id "g61055";
C2323214	AUGUSTUS	CDS	1	115	.	+	1	transcript_id "g61055.t1"; gene_id "g61055";
C2323302	AUGUSTUS	CDS	1	169	0.98	-	1	transcript_id "g61057.t1"; gene_id "g61057";
C2323304	AUGUSTUS	CDS	1	169	0.4	-	1	transcript_id "g61056.t1"; gene_id "g61056";
C2323552	AUGUSTUS	exon	1	65	0.24	-	.	transcript_id "g61058.t1"; gene_id "g61058";
C2323552	AUGUSTUS	CDS	1	36	.	-	0	transcript_id "g61058.t1"; gene_id "g61058";
C2323670	AUGUSTUS	exon	18	160	0.8	+	.	transcript_id "g61059.t1"; gene_id "g61059";
C2323670	AUGUSTUS	CDS	18	138	.	+	1	transcript_id "g61059.t1"; gene_id "g61059";
C2323868	AUGUSTUS	CDS	1	169	0.94	-	2	transcript_id "g61060.t1"; gene_id "g61060";
C2324436	AUGUSTUS	CDS	5	169	0.82	+	0	transcript_id "g61061.t1"; gene_id "g61061";
C2324572	AUGUSTUS	CDS	1	169	0.79	-	1	transcript_id "g61062.t1"; gene_id "g61062";
C2325348	AUGUSTUS	exon	1	170	0.89	-	.	transcript_id "g61063.t1"; gene_id "g61063";
C2325348	AUGUSTUS	CDS	46	170	.	-	2	transcript_id "g61063.t1"; gene_id "g61063";
C2325452	AUGUSTUS	exon	1	112	0.59	-	.	transcript_id "g61064.t1"; gene_id "g61064";
C2325452	AUGUSTUS	CDS	8	112	.	-	0	transcript_id "g61064.t1"; gene_id "g61064";
C2325738	AUGUSTUS	exon	1	170	0.99	-	.	transcript_id "g61065.t1"; gene_id "g61065";
C2325738	AUGUSTUS	CDS	24	170	.	-	0	transcript_id "g61065.t1"; gene_id "g61065";
C2327162	AUGUSTUS	CDS	1	170	0.44	-	0	transcript_id "g61066.t1"; gene_id "g61066";
C2328322	AUGUSTUS	CDS	2	170	0.99	+	0	transcript_id "g61067.t1"; gene_id "g61067";
C2328540	AUGUSTUS	CDS	47	170	0.64	+	1	transcript_id "g61068.t1"; gene_id "g61068";
C2329086	AUGUSTUS	CDS	16	170	0.93	+	0	transcript_id "g61069.t1"; gene_id "g61069";
C2329108	AUGUSTUS	CDS	9	170	0.96	+	0	transcript_id "g61070.t1"; gene_id "g61070";
C2330486	AUGUSTUS	exon	1	150	0.67	+	.	transcript_id "g61072.t1"; gene_id "g61072";
C2330486	AUGUSTUS	CDS	1	103	.	+	1	transcript_id "g61072.t1"; gene_id "g61072";
C2330488	AUGUSTUS	exon	1	150	0.6	+	.	transcript_id "g61071.t1"; gene_id "g61071";
C2330488	AUGUSTUS	CDS	1	103	.	+	1	transcript_id "g61071.t1"; gene_id "g61071";
C2330592	AUGUSTUS	CDS	15	171	0.32	-	1	transcript_id "g61073.t1"; gene_id "g61073";
C2330594	AUGUSTUS	CDS	15	171	0.49	-	1	transcript_id "g61074.t1"; gene_id "g61074";
C2331086	AUGUSTUS	exon	1	141	0.43	+	.	transcript_id "g61075.t1"; gene_id "g61075";
C2331086	AUGUSTUS	CDS	1	84	.	+	0	transcript_id "g61075.t1"; gene_id "g61075";
C2331148	AUGUSTUS	CDS	1	171	0.44	+	0	transcript_id "g61076.t1"; gene_id "g61076";
C2331550	AUGUSTUS	exon	1	171	0.56	+	.	transcript_id "g61077.t1"; gene_id "g61077";
C2331550	AUGUSTUS	CDS	1	166	.	+	1	transcript_id "g61077.t1"; gene_id "g61077";
C2332034	AUGUSTUS	CDS	1	171	0.96	-	1	transcript_id "g61078.t1"; gene_id "g61078";
C2332218	AUGUSTUS	CDS	24	171	0.94	+	0	transcript_id "g61079.t1"; gene_id "g61079";
C2332258	AUGUSTUS	CDS	8	75	0.51	+	0	transcript_id "g61080.t1"; gene_id "g61080";
C2332258	AUGUSTUS	CDS	131	166	0.29	+	1	transcript_id "g61080.t1"; gene_id "g61080";
C2332472	AUGUSTUS	exon	1	160	0.76	+	.	transcript_id "g61081.t1"; gene_id "g61081";
C2332472	AUGUSTUS	CDS	1	137	.	+	2	transcript_id "g61081.t1"; gene_id "g61081";
C2332554	AUGUSTUS	CDS	1	171	0.99	+	1	transcript_id "g61082.t1"; gene_id "g61082";
C2332616	AUGUSTUS	CDS	20	171	0.94	+	0	transcript_id "g61083.t1"; gene_id "g61083";
C2332682	AUGUSTUS	exon	1	170	0.69	+	.	transcript_id "g61084.t1"; gene_id "g61084";
C2332682	AUGUSTUS	CDS	1	138	.	+	0	transcript_id "g61084.t1"; gene_id "g61084";
C2333710	AUGUSTUS	exon	1	125	0.79	-	.	transcript_id "g61085.t1"; gene_id "g61085";
C2333710	AUGUSTUS	CDS	1	93	.	-	0	transcript_id "g61085.t1"; gene_id "g61085";
C2334480	AUGUSTUS	CDS	1	172	0.79	+	0	transcript_id "g61086.t1"; gene_id "g61086";
C2334588	AUGUSTUS	exon	1	172	0.98	-	.	transcript_id "g61087.t1"; gene_id "g61087";
C2334588	AUGUSTUS	CDS	26	172	.	-	0	transcript_id "g61087.t1"; gene_id "g61087";
C2334662	AUGUSTUS	CDS	1	172	0.45	-	1	transcript_id "g61088.t1"; gene_id "g61088";
C2334686	AUGUSTUS	exon	1	172	0.85	-	.	transcript_id "g61089.t1"; gene_id "g61089";
C2334686	AUGUSTUS	CDS	41	172	.	-	0	transcript_id "g61089.t1"; gene_id "g61089";
C2334896	AUGUSTUS	exon	1	170	0.39	+	.	transcript_id "g61090.t1"; gene_id "g61090";
C2334896	AUGUSTUS	CDS	1	64	.	+	1	transcript_id "g61090.t1"; gene_id "g61090";
C2335108	AUGUSTUS	exon	1	160	0.96	+	.	transcript_id "g61091.t1"; gene_id "g61091";
C2335108	AUGUSTUS	CDS	1	132	.	+	0	transcript_id "g61091.t1"; gene_id "g61091";
C2335160	AUGUSTUS	CDS	4	172	0.97	+	0	transcript_id "g61092.t1"; gene_id "g61092";
C2335298	AUGUSTUS	CDS	1	172	0.84	+	2	transcript_id "g61094.t1"; gene_id "g61094";
C2335302	AUGUSTUS	CDS	1	172	0.79	+	0	transcript_id "g61093.t1"; gene_id "g61093";
C2335478	AUGUSTUS	exon	1	150	0.4	+	.	transcript_id "g61095.t1"; gene_id "g61095";
C2335478	AUGUSTUS	CDS	1	117	.	+	0	transcript_id "g61095.t1"; gene_id "g61095";
C2335558	AUGUSTUS	CDS	1	167	0.69	+	0	transcript_id "g61096.t1"; gene_id "g61096";
C2335582	AUGUSTUS	CDS	1	172	0.64	+	2	transcript_id "g61097.t1"; gene_id "g61097";
C2335696	AUGUSTUS	exon	7	85	0.32	-	.	transcript_id "g61103.t1"; gene_id "g61103";
C2335696	AUGUSTUS	CDS	7	24	.	-	0	transcript_id "g61103.t1"; gene_id "g61103";
C2335720	AUGUSTUS	CDS	1	172	0.94	+	2	transcript_id "g61098.t1"; gene_id "g61098";
C2335804	AUGUSTUS	CDS	21	172	0.94	+	0	transcript_id "g61099.t1"; gene_id "g61099";
C2335832	AUGUSTUS	CDS	1	172	0.89	+	2	transcript_id "g61100.t1"; gene_id "g61100";
C2336096	AUGUSTUS	exon	1	172	0.85	-	.	transcript_id "g61101.t1"; gene_id "g61101";
C2336096	AUGUSTUS	CDS	15	172	.	-	2	transcript_id "g61101.t1"; gene_id "g61101";
C2336354	AUGUSTUS	CDS	22	172	0.99	+	0	transcript_id "g61102.t1"; gene_id "g61102";
C2336614	AUGUSTUS	exon	1	172	0.75	-	.	transcript_id "g61104.t1"; gene_id "g61104";
C2336614	AUGUSTUS	CDS	22	172	.	-	1	transcript_id "g61104.t1"; gene_id "g61104";
C2336676	AUGUSTUS	exon	1	172	1	-	.	transcript_id "g61105.t1"; gene_id "g61105";
C2336676	AUGUSTUS	CDS	16	172	.	-	1	transcript_id "g61105.t1"; gene_id "g61105";
C2336722	AUGUSTUS	exon	1	170	0.46	+	.	transcript_id "g61106.t1"; gene_id "g61106";
C2336722	AUGUSTUS	CDS	1	146	.	+	2	transcript_id "g61106.t1"; gene_id "g61106";
C2336746	AUGUSTUS	CDS	1	172	1	+	0	transcript_id "g61107.t1"; gene_id "g61107";
C2336768	AUGUSTUS	CDS	1	172	0.97	+	0	transcript_id "g61108.t1"; gene_id "g61108";
C2336826	AUGUSTUS	CDS	1	172	0.71	+	0	transcript_id "g61109.t1"; gene_id "g61109";
C2337140	AUGUSTUS	CDS	16	172	0.49	+	0	transcript_id "g61110.t1"; gene_id "g61110";
C2337240	AUGUSTUS	exon	1	115	0.41	-	.	transcript_id "g61111.t1"; gene_id "g61111";
C2337240	AUGUSTUS	CDS	1	44	.	-	0	transcript_id "g61111.t1"; gene_id "g61111";
C2337362	AUGUSTUS	CDS	1	172	1	+	2	transcript_id "g61112.t1"; gene_id "g61112";
C2338076	AUGUSTUS	exon	1	160	0.85	+	.	transcript_id "g61113.t1"; gene_id "g61113";
C2338076	AUGUSTUS	CDS	1	137	.	+	2	transcript_id "g61113.t1"; gene_id "g61113";
C2338120	AUGUSTUS	exon	7	55	0.55	-	.	transcript_id "g61114.t1"; gene_id "g61114";
C2338120	AUGUSTUS	CDS	7	27	.	-	0	transcript_id "g61114.t1"; gene_id "g61114";
C2338272	AUGUSTUS	CDS	26	172	0.46	-	1	transcript_id "g61119.t1"; gene_id "g61119";
C2338360	AUGUSTUS	CDS	4	172	0.5	+	0	transcript_id "g61115.t1"; gene_id "g61115";
C2338362	AUGUSTUS	CDS	4	172	0.52	+	0	transcript_id "g61116.t1"; gene_id "g61116";
C2338364	AUGUSTUS	CDS	1	172	0.47	-	0	transcript_id "g61117.t1"; gene_id "g61117";
C2338366	AUGUSTUS	CDS	1	172	0.82	-	0	transcript_id "g61118.t1"; gene_id "g61118";
C2338564	AUGUSTUS	CDS	11	137	0.77	+	0	transcript_id "g61120.t1"; gene_id "g61120";
C2338614	AUGUSTUS	CDS	8	172	0.99	+	0	transcript_id "g61121.t1"; gene_id "g61121";
C2338800	AUGUSTUS	CDS	22	172	0.9	+	0	transcript_id "g61122.t1"; gene_id "g61122";
C2338978	AUGUSTUS	CDS	1	172	0.99	+	1	transcript_id "g61123.t1"; gene_id "g61123";
C2339218	AUGUSTUS	exon	41	172	0.67	+	.	transcript_id "g61124.t1"; gene_id "g61124";
C2339218	AUGUSTUS	CDS	41	161	.	+	1	transcript_id "g61124.t1"; gene_id "g61124";
C2339232	AUGUSTUS	CDS	23	172	0.93	+	0	transcript_id "g61125.t1"; gene_id "g61125";
C2339630	AUGUSTUS	exon	1	125	0.72	-	.	transcript_id "g61126.t1"; gene_id "g61126";
C2339630	AUGUSTUS	CDS	1	72	.	-	0	transcript_id "g61126.t1"; gene_id "g61126";
C2339686	AUGUSTUS	exon	1	172	0.79	-	.	transcript_id "g61127.t1"; gene_id "g61127";
C2339686	AUGUSTUS	CDS	5	172	.	-	0	transcript_id "g61127.t1"; gene_id "g61127";
C2339706	AUGUSTUS	exon	1	125	0.41	-	.	transcript_id "g61128.t1"; gene_id "g61128";
C2339706	AUGUSTUS	CDS	1	83	.	-	0	transcript_id "g61128.t1"; gene_id "g61128";
C2340628	AUGUSTUS	CDS	2	172	0.94	+	0	transcript_id "g61129.t1"; gene_id "g61129";
C2340778	AUGUSTUS	CDS	20	172	1	+	0	transcript_id "g61130.t1"; gene_id "g61130";
C2340808	AUGUSTUS	exon	1	172	0.87	-	.	transcript_id "g61131.t1"; gene_id "g61131";
C2340808	AUGUSTUS	CDS	16	172	.	-	1	transcript_id "g61131.t1"; gene_id "g61131";
C2341486	AUGUSTUS	CDS	18	173	1	+	0	transcript_id "g61132.t1"; gene_id "g61132";
C2341598	AUGUSTUS	exon	1	173	0.88	-	.	transcript_id "g61133.t1"; gene_id "g61133";
C2341598	AUGUSTUS	CDS	25	173	.	-	2	transcript_id "g61133.t1"; gene_id "g61133";
C2341712	AUGUSTUS	CDS	9	173	0.55	+	0	transcript_id "g61134.t1"; gene_id "g61134";
C2341846	AUGUSTUS	CDS	19	173	0.74	+	0	transcript_id "g61135.t1"; gene_id "g61135";
C2342430	AUGUSTUS	CDS	3	173	0.6	+	0	transcript_id "g61136.t1"; gene_id "g61136";
C2342450	AUGUSTUS	CDS	1	173	0.68	+	0	transcript_id "g61137.t1"; gene_id "g61137";
C2342702	AUGUSTUS	exon	1	173	0.82	-	.	transcript_id "g61138.t1"; gene_id "g61138";
C2342702	AUGUSTUS	CDS	4	173	.	-	2	transcript_id "g61138.t1"; gene_id "g61138";
C2342962	AUGUSTUS	CDS	21	168	0.53	+	0	transcript_id "g61139.t1"; gene_id "g61139";
C2342992	AUGUSTUS	exon	1	173	0.83	-	.	transcript_id "g61140.t1"; gene_id "g61140";
C2342992	AUGUSTUS	CDS	27	173	.	-	0	transcript_id "g61140.t1"; gene_id "g61140";
C2343300	AUGUSTUS	CDS	6	173	0.56	+	0	transcript_id "g61141.t1"; gene_id "g61141";
C2343804	AUGUSTUS	CDS	23	173	0.86	+	0	transcript_id "g61142.t1"; gene_id "g61142";
C2343806	AUGUSTUS	CDS	22	173	0.59	+	0	transcript_id "g61143.t1"; gene_id "g61143";
C2343810	AUGUSTUS	exon	1	173	0.99	-	.	transcript_id "g61144.t1"; gene_id "g61144";
C2343810	AUGUSTUS	CDS	34	173	.	-	2	transcript_id "g61144.t1"; gene_id "g61144";
C2344104	AUGUSTUS	CDS	1	173	1	+	1	transcript_id "g61145.t1"; gene_id "g61145";
C2344298	AUGUSTUS	CDS	9	173	0.81	+	0	transcript_id "g61146.t1"; gene_id "g61146";
C2344336	AUGUSTUS	CDS	1	173	0.68	-	1	transcript_id "g61147.t1"; gene_id "g61147";
C2344602	AUGUSTUS	exon	1	173	0.73	-	.	transcript_id "g61148.t1"; gene_id "g61148";
C2344602	AUGUSTUS	CDS	15	173	.	-	0	transcript_id "g61148.t1"; gene_id "g61148";
C2345136	AUGUSTUS	exon	1	173	1	-	.	transcript_id "g61149.t1"; gene_id "g61149";
C2345136	AUGUSTUS	CDS	15	173	.	-	0	transcript_id "g61149.t1"; gene_id "g61149";
C2345188	AUGUSTUS	exon	7	115	0.86	-	.	transcript_id "g61150.t1"; gene_id "g61150";
C2345188	AUGUSTUS	CDS	7	38	.	-	0	transcript_id "g61150.t1"; gene_id "g61150";
C2345244	AUGUSTUS	CDS	1	173	1	+	1	transcript_id "g61151.t1"; gene_id "g61151";
C2345540	AUGUSTUS	exon	1	173	0.99	-	.	transcript_id "g61152.t1"; gene_id "g61152";
C2345540	AUGUSTUS	CDS	21	173	.	-	0	transcript_id "g61152.t1"; gene_id "g61152";
C2345580	AUGUSTUS	exon	1	173	0.84	-	.	transcript_id "g61153.t1"; gene_id "g61153";
C2345580	AUGUSTUS	CDS	16	173	.	-	2	transcript_id "g61153.t1"; gene_id "g61153";
C2345724	AUGUSTUS	exon	1	173	1	-	.	transcript_id "g61154.t1"; gene_id "g61154";
C2345724	AUGUSTUS	CDS	17	173	.	-	1	transcript_id "g61154.t1"; gene_id "g61154";
C2345726	AUGUSTUS	exon	1	173	1	-	.	transcript_id "g61155.t1"; gene_id "g61155";
C2345726	AUGUSTUS	CDS	17	173	.	-	1	transcript_id "g61155.t1"; gene_id "g61155";
C2345926	AUGUSTUS	CDS	23	173	0.98	+	0	transcript_id "g61156.t1"; gene_id "g61156";
C2345942	AUGUSTUS	CDS	1	173	0.35	-	1	transcript_id "g61157.t1"; gene_id "g61157";
C2346078	AUGUSTUS	CDS	10	173	0.35	+	0	transcript_id "g61158.t1"; gene_id "g61158";
C2346176	AUGUSTUS	CDS	24	173	0.46	+	0	transcript_id "g61159.t1"; gene_id "g61159";
C2346460	AUGUSTUS	CDS	23	173	0.61	+	0	transcript_id "g61160.t1"; gene_id "g61160";
C2346462	AUGUSTUS	CDS	23	173	0.92	+	0	transcript_id "g61161.t1"; gene_id "g61161";
C2346646	AUGUSTUS	CDS	1	173	0.97	-	0	transcript_id "g61162.t1"; gene_id "g61162";
C2347746	AUGUSTUS	exon	1	105	0.44	-	.	transcript_id "g61163.t1"; gene_id "g61163";
C2347746	AUGUSTUS	CDS	1	71	.	-	0	transcript_id "g61163.t1"; gene_id "g61163";
C2348026	AUGUSTUS	exon	15	174	0.79	+	.	transcript_id "g61164.t1"; gene_id "g61164";
C2348026	AUGUSTUS	CDS	44	174	.	+	0	transcript_id "g61164.t1"; gene_id "g61164";
C2348256	AUGUSTUS	CDS	16	169	0.52	+	0	transcript_id "g61165.t1"; gene_id "g61165";
C2348354	AUGUSTUS	CDS	7	174	0.77	+	0	transcript_id "g61166.t1"; gene_id "g61166";
C2348458	AUGUSTUS	exon	1	140	0.92	+	.	transcript_id "g61167.t1"; gene_id "g61167";
C2348458	AUGUSTUS	CDS	1	119	.	+	2	transcript_id "g61167.t1"; gene_id "g61167";
C2348484	AUGUSTUS	exon	7	115	0.56	-	.	transcript_id "g61168.t1"; gene_id "g61168";
C2348484	AUGUSTUS	CDS	7	55	.	-	0	transcript_id "g61168.t1"; gene_id "g61168";
C2348506	AUGUSTUS	CDS	15	174	0.51	+	0	transcript_id "g61169.t1"; gene_id "g61169";
C2348508	AUGUSTUS	CDS	1	174	0.7	+	2	transcript_id "g61170.t1"; gene_id "g61170";
C2348670	AUGUSTUS	CDS	9	174	0.68	+	0	transcript_id "g61171.t1"; gene_id "g61171";
C2348678	AUGUSTUS	CDS	24	174	0.89	+	0	transcript_id "g61172.t1"; gene_id "g61172";
C2348718	AUGUSTUS	exon	1	158	0.85	+	.	transcript_id "g61173.t1"; gene_id "g61173";
C2348718	AUGUSTUS	CDS	1	131	.	+	2	transcript_id "g61173.t1"; gene_id "g61173";
C2348980	AUGUSTUS	exon	18	150	0.52	+	.	transcript_id "g61174.t1"; gene_id "g61174";
C2348980	AUGUSTUS	CDS	18	119	.	+	0	transcript_id "g61174.t1"; gene_id "g61174";
C2348992	AUGUSTUS	exon	1	140	0.5	+	.	transcript_id "g61175.t1"; gene_id "g61175";
C2348992	AUGUSTUS	CDS	1	111	.	+	0	transcript_id "g61175.t1"; gene_id "g61175";
C2349076	AUGUSTUS	exon	1	174	0.83	+	.	transcript_id "g61176.t1"; gene_id "g61176";
C2349076	AUGUSTUS	CDS	1	164	.	+	2	transcript_id "g61176.t1"; gene_id "g61176";
C2349146	AUGUSTUS	CDS	21	174	0.52	+	0	transcript_id "g61177.t1"; gene_id "g61177";
C2349244	AUGUSTUS	exon	1	115	0.43	-	.	transcript_id "g61178.t1"; gene_id "g61178";
C2349244	AUGUSTUS	CDS	1	81	.	-	0	transcript_id "g61178.t1"; gene_id "g61178";
C2349426	AUGUSTUS	CDS	16	174	0.93	+	0	transcript_id "g61179.t1"; gene_id "g61179";
C2349594	AUGUSTUS	CDS	1	174	0.88	+	0	transcript_id "g61180.t1"; gene_id "g61180";
C2349656	AUGUSTUS	CDS	1	174	0.69	+	0	transcript_id "g61181.t1"; gene_id "g61181";
C2349666	AUGUSTUS	exon	32	174	0.98	+	.	transcript_id "g61182.t1"; gene_id "g61182";
C2349666	AUGUSTUS	CDS	60	174	.	+	0	transcript_id "g61182.t1"; gene_id "g61182";
C2349708	AUGUSTUS	exon	1	174	0.99	-	.	transcript_id "g61183.t1"; gene_id "g61183";
C2349708	AUGUSTUS	CDS	21	174	.	-	1	transcript_id "g61183.t1"; gene_id "g61183";
C2349844	AUGUSTUS	exon	1	174	1	-	.	transcript_id "g61184.t1"; gene_id "g61184";
C2349844	AUGUSTUS	CDS	18	174	.	-	1	transcript_id "g61184.t1"; gene_id "g61184";
C2349906	AUGUSTUS	CDS	1	174	0.71	+	0	transcript_id "g61185.t1"; gene_id "g61185";
C2349908	AUGUSTUS	CDS	1	174	0.95	-	0	transcript_id "g61186.t1"; gene_id "g61186";
C2349910	AUGUSTUS	CDS	1	169	0.71	+	1	transcript_id "g61187.t1"; gene_id "g61187";
C2349954	AUGUSTUS	exon	1	174	0.97	-	.	transcript_id "g61188.t1"; gene_id "g61188";
C2349954	AUGUSTUS	CDS	17	174	.	-	2	transcript_id "g61188.t1"; gene_id "g61188";
C2349984	AUGUSTUS	CDS	1	174	0.66	-	1	transcript_id "g61189.t1"; gene_id "g61189";
C2349990	AUGUSTUS	exon	1	65	0.34	-	.	transcript_id "g61191.t1"; gene_id "g61191";
C2349990	AUGUSTUS	CDS	1	25	.	-	0	transcript_id "g61191.t1"; gene_id "g61191";
C2350028	AUGUSTUS	exon	1	160	0.41	+	.	transcript_id "g61190.t1"; gene_id "g61190";
C2350028	AUGUSTUS	CDS	1	137	.	+	2	transcript_id "g61190.t1"; gene_id "g61190";
C2350048	AUGUSTUS	CDS	1	174	0.42	+	1	transcript_id "g61192.t1"; gene_id "g61192";
C2350266	AUGUSTUS	exon	1	170	0.98	+	.	transcript_id "g61193.t1"; gene_id "g61193";
C2350266	AUGUSTUS	CDS	1	145	.	+	1	transcript_id "g61193.t1"; gene_id "g61193";
C2350306	AUGUSTUS	CDS	17	174	0.52	+	0	transcript_id "g61194.t1"; gene_id "g61194";
C2350462	AUGUSTUS	CDS	2	174	0.7	+	0	transcript_id "g61195.t1"; gene_id "g61195";
C2350584	AUGUSTUS	CDS	17	174	0.81	+	0	transcript_id "g61196.t1"; gene_id "g61196";
C2350602	AUGUSTUS	CDS	19	174	0.47	+	0	transcript_id "g61197.t1"; gene_id "g61197";
C2350788	AUGUSTUS	CDS	11	174	1	+	0	transcript_id "g61198.t1"; gene_id "g61198";
C2350854	AUGUSTUS	exon	1	174	0.99	-	.	transcript_id "g61199.t1"; gene_id "g61199";
C2350854	AUGUSTUS	CDS	23	174	.	-	2	transcript_id "g61199.t1"; gene_id "g61199";
C2350906	AUGUSTUS	CDS	7	174	0.94	-	0	transcript_id "g61200.t1"; gene_id "g61200";
C2351060	AUGUSTUS	CDS	22	174	0.58	+	0	transcript_id "g61201.t1"; gene_id "g61201";
C2351250	AUGUSTUS	CDS	13	174	1	+	0	transcript_id "g61202.t1"; gene_id "g61202";
C2351324	AUGUSTUS	CDS	10	174	0.86	+	0	transcript_id "g61203.t1"; gene_id "g61203";
C2351368	AUGUSTUS	CDS	1	174	0.62	-	1	transcript_id "g61204.t1"; gene_id "g61204";
C2351472	AUGUSTUS	CDS	1	174	0.42	-	2	transcript_id "g61205.t1"; gene_id "g61205";
C2351526	AUGUSTUS	CDS	5	174	0.68	+	0	transcript_id "g61206.t1"; gene_id "g61206";
C2351548	AUGUSTUS	CDS	5	174	1	+	0	transcript_id "g61207.t1"; gene_id "g61207";
C2351862	AUGUSTUS	exon	7	125	0.83	-	.	transcript_id "g61208.t1"; gene_id "g61208";
C2351862	AUGUSTUS	CDS	7	94	.	-	0	transcript_id "g61208.t1"; gene_id "g61208";
C2352624	AUGUSTUS	exon	1	174	0.91	-	.	transcript_id "g61210.t1"; gene_id "g61210";
C2352624	AUGUSTUS	CDS	25	174	.	-	0	transcript_id "g61210.t1"; gene_id "g61210";
C2352632	AUGUSTUS	CDS	12	174	0.49	+	0	transcript_id "g61209.t1"; gene_id "g61209";
C2353066	AUGUSTUS	CDS	19	175	0.57	+	0	transcript_id "g61211.t1"; gene_id "g61211";
C2353432	AUGUSTUS	exon	1	110	0.38	+	.	transcript_id "g61212.t1"; gene_id "g61212";
C2353432	AUGUSTUS	CDS	1	80	.	+	2	transcript_id "g61212.t1"; gene_id "g61212";
C2353470	AUGUSTUS	exon	1	175	1	-	.	transcript_id "g61213.t1"; gene_id "g61213";
C2353470	AUGUSTUS	CDS	11	175	.	-	0	transcript_id "g61213.t1"; gene_id "g61213";
C2353860	AUGUSTUS	CDS	1	175	0.5	-	2	transcript_id "g61214.t1"; gene_id "g61214";
C2353866	AUGUSTUS	CDS	15	175	0.35	+	0	transcript_id "g61215.t1"; gene_id "g61215";
C2353880	AUGUSTUS	exon	1	141	0.24	+	.	transcript_id "g61216.t1"; gene_id "g61216";
C2353880	AUGUSTUS	CDS	1	62	.	+	2	transcript_id "g61216.t1"; gene_id "g61216";
C2353960	AUGUSTUS	exon	44	165	0.38	+	.	transcript_id "g61217.t1"; gene_id "g61217";
C2353960	AUGUSTUS	CDS	44	132	.	+	2	transcript_id "g61217.t1"; gene_id "g61217";
C2354122	AUGUSTUS	exon	7	55	0.18	-	.	transcript_id "g61218.t1"; gene_id "g61218";
C2354122	AUGUSTUS	CDS	7	16	.	-	0	transcript_id "g61218.t1"; gene_id "g61218";
C2354210	AUGUSTUS	CDS	1	175	0.98	+	0	transcript_id "g61219.t1"; gene_id "g61219";
C2354214	AUGUSTUS	CDS	10	165	0.36	-	0	transcript_id "g61220.t1"; gene_id "g61220";
C2354814	AUGUSTUS	CDS	19	175	0.89	+	0	transcript_id "g61221.t1"; gene_id "g61221";
C2355068	AUGUSTUS	CDS	1	175	0.61	+	0	transcript_id "g61222.t1"; gene_id "g61222";
C2355110	AUGUSTUS	CDS	1	175	0.5	+	0	transcript_id "g61224.t1"; gene_id "g61224";
C2355114	AUGUSTUS	CDS	1	175	0.78	+	0	transcript_id "g61223.t1"; gene_id "g61223";
C2355354	AUGUSTUS	CDS	8	175	0.6	+	0	transcript_id "g61225.t1"; gene_id "g61225";
C2355418	AUGUSTUS	CDS	23	175	1	+	0	transcript_id "g61226.t1"; gene_id "g61226";
C2355562	AUGUSTUS	exon	28	175	0.99	+	.	transcript_id "g61227.t1"; gene_id "g61227";
C2355562	AUGUSTUS	CDS	56	175	.	+	0	transcript_id "g61227.t1"; gene_id "g61227";
C2355770	AUGUSTUS	CDS	1	175	0.78	+	1	transcript_id "g61228.t1"; gene_id "g61228";
C2355964	AUGUSTUS	exon	1	175	0.95	-	.	transcript_id "g61229.t1"; gene_id "g61229";
C2355964	AUGUSTUS	CDS	8	175	.	-	0	transcript_id "g61229.t1"; gene_id "g61229";
C2356076	AUGUSTUS	exon	7	115	0.42	-	.	transcript_id "g61230.t1"; gene_id "g61230";
C2356076	AUGUSTUS	CDS	7	54	.	-	0	transcript_id "g61230.t1"; gene_id "g61230";
C2356078	AUGUSTUS	exon	20	95	0.22	-	.	transcript_id "g61231.t1"; gene_id "g61231";
C2356078	AUGUSTUS	CDS	20	38	.	-	0	transcript_id "g61231.t1"; gene_id "g61231";
C2356186	AUGUSTUS	CDS	3	175	0.62	+	0	transcript_id "g61232.t1"; gene_id "g61232";
C2356190	AUGUSTUS	CDS	3	175	1	+	0	transcript_id "g61233.t1"; gene_id "g61233";
C2356334	AUGUSTUS	exon	7	105	0.4	-	.	transcript_id "g61234.t1"; gene_id "g61234";
C2356334	AUGUSTUS	CDS	7	70	.	-	0	transcript_id "g61234.t1"; gene_id "g61234";
C2356354	AUGUSTUS	CDS	17	175	0.73	+	0	transcript_id "g61235.t1"; gene_id "g61235";
C2356610	AUGUSTUS	exon	1	160	0.93	+	.	transcript_id "g61236.t1"; gene_id "g61236";
C2356610	AUGUSTUS	CDS	1	134	.	+	2	transcript_id "g61236.t1"; gene_id "g61236";
C2356758	AUGUSTUS	exon	1	137	0.32	+	.	transcript_id "g61237.t1"; gene_id "g61237";
C2356758	AUGUSTUS	CDS	1	43	.	+	1	transcript_id "g61237.t1"; gene_id "g61237";
C2356854	AUGUSTUS	CDS	21	175	0.99	+	0	transcript_id "g61238.t1"; gene_id "g61238";
C2357008	AUGUSTUS	CDS	5	175	0.49	+	0	transcript_id "g61239.t1"; gene_id "g61239";
C2357038	AUGUSTUS	CDS	11	175	0.6	+	0	transcript_id "g61240.t1"; gene_id "g61240";
C2357074	AUGUSTUS	CDS	1	175	0.88	-	0	transcript_id "g61241.t1"; gene_id "g61241";
C2357530	AUGUSTUS	CDS	1	175	0.8	+	0	transcript_id "g61242.t1"; gene_id "g61242";
C2357668	AUGUSTUS	CDS	15	175	0.56	+	0	transcript_id "g61243.t1"; gene_id "g61243";
C2357784	AUGUSTUS	exon	1	175	0.94	-	.	transcript_id "g61244.t1"; gene_id "g61244";
C2357784	AUGUSTUS	CDS	8	175	.	-	0	transcript_id "g61244.t1"; gene_id "g61244";
C2357908	AUGUSTUS	exon	1	165	0.56	-	.	transcript_id "g61245.t1"; gene_id "g61245";
C2357908	AUGUSTUS	CDS	20	165	.	-	2	transcript_id "g61245.t1"; gene_id "g61245";
C2357938	AUGUSTUS	CDS	21	175	0.91	+	0	transcript_id "g61246.t1"; gene_id "g61246";
C2357948	AUGUSTUS	exon	17	175	0.84	+	.	transcript_id "g61247.t1"; gene_id "g61247";
C2357948	AUGUSTUS	CDS	44	175	.	+	0	transcript_id "g61247.t1"; gene_id "g61247";
C2358436	AUGUSTUS	exon	1	176	0.77	-	.	transcript_id "g61248.t1"; gene_id "g61248";
C2358436	AUGUSTUS	CDS	81	176	.	-	0	transcript_id "g61248.t1"; gene_id "g61248";
C2358630	AUGUSTUS	exon	1	176	0.92	+	.	transcript_id "g61249.t1"; gene_id "g61249";
C2358630	AUGUSTUS	CDS	1	168	.	+	0	transcript_id "g61249.t1"; gene_id "g61249";
C2359046	AUGUSTUS	exon	18	176	0.99	+	.	transcript_id "g61250.t1"; gene_id "g61250";
C2359046	AUGUSTUS	CDS	46	176	.	+	0	transcript_id "g61250.t1"; gene_id "g61250";
C2359328	AUGUSTUS	exon	1	105	0.74	-	.	transcript_id "g61251.t1"; gene_id "g61251";
C2359328	AUGUSTUS	CDS	1	78	.	-	0	transcript_id "g61251.t1"; gene_id "g61251";
C2359488	AUGUSTUS	exon	1	166	0.94	-	.	transcript_id "g61252.t1"; gene_id "g61252";
C2359488	AUGUSTUS	CDS	48	166	.	-	2	transcript_id "g61252.t1"; gene_id "g61252";
C2359516	AUGUSTUS	exon	10	115	0.41	-	.	transcript_id "g61253.t1"; gene_id "g61253";
C2359516	AUGUSTUS	CDS	10	93	.	-	0	transcript_id "g61253.t1"; gene_id "g61253";
C2359646	AUGUSTUS	CDS	1	176	0.81	+	0	transcript_id "g61254.t1"; gene_id "g61254";
C2359704	AUGUSTUS	CDS	23	176	0.74	+	0	transcript_id "g61255.t1"; gene_id "g61255";
C2359730	AUGUSTUS	exon	1	125	0.77	-	.	transcript_id "g61256.t1"; gene_id "g61256";
C2359730	AUGUSTUS	CDS	1	87	.	-	0	transcript_id "g61256.t1"; gene_id "g61256";
C2359970	AUGUSTUS	CDS	18	176	0.71	+	0	transcript_id "g61257.t1"; gene_id "g61257";
C2360098	AUGUSTUS	exon	1	176	0.99	-	.	transcript_id "g61258.t1"; gene_id "g61258";
C2360098	AUGUSTUS	CDS	81	176	.	-	0	transcript_id "g61258.t1"; gene_id "g61258";
C2360132	AUGUSTUS	CDS	7	176	0.68	-	2	transcript_id "g61259.t1"; gene_id "g61259";
C2360272	AUGUSTUS	CDS	20	176	0.55	+	0	transcript_id "g61260.t1"; gene_id "g61260";
C2360636	AUGUSTUS	CDS	1	176	0.99	+	0	transcript_id "g61261.t1"; gene_id "g61261";
C2360874	AUGUSTUS	exon	1	176	0.93	-	.	transcript_id "g61262.t1"; gene_id "g61262";
C2360874	AUGUSTUS	CDS	16	176	.	-	2	transcript_id "g61262.t1"; gene_id "g61262";
C2361104	AUGUSTUS	CDS	1	154	0.95	-	0	transcript_id "g61263.t1"; gene_id "g61263";
C2361114	AUGUSTUS	CDS	22	145	0.64	+	0	transcript_id "g61264.t1"; gene_id "g61264";
C2361252	AUGUSTUS	CDS	7	176	0.46	+	0	transcript_id "g61265.t1"; gene_id "g61265";
C2361298	AUGUSTUS	CDS	1	176	0.71	-	2	transcript_id "g61266.t1"; gene_id "g61266";
C2361350	AUGUSTUS	CDS	10	176	0.53	+	0	transcript_id "g61267.t1"; gene_id "g61267";
C2361870	AUGUSTUS	CDS	20	176	0.64	+	0	transcript_id "g61268.t1"; gene_id "g61268";
C2361944	AUGUSTUS	CDS	12	176	0.82	+	0	transcript_id "g61269.t1"; gene_id "g61269";
C2361970	AUGUSTUS	exon	1	176	1	-	.	transcript_id "g61270.t1"; gene_id "g61270";
C2361970	AUGUSTUS	CDS	12	176	.	-	0	transcript_id "g61270.t1"; gene_id "g61270";
C2362028	AUGUSTUS	CDS	3	176	0.89	+	0	transcript_id "g61271.t1"; gene_id "g61271";
C2362192	AUGUSTUS	exon	1	125	0.51	-	.	transcript_id "g61272.t1"; gene_id "g61272";
C2362192	AUGUSTUS	CDS	1	93	.	-	0	transcript_id "g61272.t1"; gene_id "g61272";
C2362282	AUGUSTUS	CDS	1	176	0.54	-	0	transcript_id "g61273.t1"; gene_id "g61273";
C2362618	AUGUSTUS	CDS	12	176	0.37	-	0	transcript_id "g61274.t1"; gene_id "g61274";
C2362656	AUGUSTUS	exon	7	115	0.31	-	.	transcript_id "g61275.t1"; gene_id "g61275";
C2362656	AUGUSTUS	CDS	7	55	.	-	0	transcript_id "g61275.t1"; gene_id "g61275";
C2362864	AUGUSTUS	CDS	7	176	0.74	-	1	transcript_id "g61276.t1"; gene_id "g61276";
C2363345	AUGUSTUS	exon	1	176	0.35	+	.	transcript_id "g61277.t1"; gene_id "g61277";
C2363345	AUGUSTUS	CDS	1	154	.	+	1	transcript_id "g61277.t1"; gene_id "g61277";
C2363347	AUGUSTUS	exon	1	176	0.45	+	.	transcript_id "g61278.t1"; gene_id "g61278";
C2363347	AUGUSTUS	CDS	1	154	.	+	1	transcript_id "g61278.t1"; gene_id "g61278";
C2363459	AUGUSTUS	CDS	7	176	0.78	+	0	transcript_id "g61279.t1"; gene_id "g61279";
C2363467	AUGUSTUS	CDS	23	176	0.89	+	0	transcript_id "g61280.t1"; gene_id "g61280";
C2363579	AUGUSTUS	exon	1	176	0.63	-	.	transcript_id "g61281.t1"; gene_id "g61281";
C2363579	AUGUSTUS	CDS	9	176	.	-	0	transcript_id "g61281.t1"; gene_id "g61281";
C2363611	AUGUSTUS	CDS	27	176	0.84	-	0	transcript_id "g61282.t1"; gene_id "g61282";
C2364023	AUGUSTUS	exon	7	125	0.46	-	.	transcript_id "g61283.t1"; gene_id "g61283";
C2364023	AUGUSTUS	CDS	7	67	.	-	0	transcript_id "g61283.t1"; gene_id "g61283";
C2364223	AUGUSTUS	CDS	22	177	0.76	+	0	transcript_id "g61284.t1"; gene_id "g61284";
C2364251	AUGUSTUS	CDS	6	177	0.58	+	0	transcript_id "g61285.t1"; gene_id "g61285";
C2364331	AUGUSTUS	CDS	1	177	0.38	+	1	transcript_id "g61286.t1"; gene_id "g61286";
C2364365	AUGUSTUS	exon	1	168	0.62	+	.	transcript_id "g61287.t1"; gene_id "g61287";
C2364365	AUGUSTUS	CDS	1	128	.	+	2	transcript_id "g61287.t1"; gene_id "g61287";
C2364739	AUGUSTUS	exon	1	125	0.71	-	.	transcript_id "g61288.t1"; gene_id "g61288";
C2364739	AUGUSTUS	CDS	1	70	.	-	0	transcript_id "g61288.t1"; gene_id "g61288";
C2364777	AUGUSTUS	exon	1	177	0.85	-	.	transcript_id "g61289.t1"; gene_id "g61289";
C2364777	AUGUSTUS	CDS	21	177	.	-	1	transcript_id "g61289.t1"; gene_id "g61289";
C2364855	AUGUSTUS	CDS	12	177	1	+	0	transcript_id "g61290.t1"; gene_id "g61290";
C2365307	AUGUSTUS	CDS	12	177	0.5	+	0	transcript_id "g61291.t1"; gene_id "g61291";
C2365339	AUGUSTUS	CDS	13	177	0.95	+	0	transcript_id "g61292.t1"; gene_id "g61292";
C2365485	AUGUSTUS	exon	1	177	0.97	-	.	transcript_id "g61293.t1"; gene_id "g61293";
C2365485	AUGUSTUS	CDS	16	177	.	-	0	transcript_id "g61293.t1"; gene_id "g61293";
C2365531	AUGUSTUS	exon	1	128	0.36	+	.	transcript_id "g61294.t1"; gene_id "g61294";
C2365531	AUGUSTUS	CDS	1	42	.	+	0	transcript_id "g61294.t1"; gene_id "g61294";
C2366227	AUGUSTUS	CDS	22	177	1	+	0	transcript_id "g61295.t1"; gene_id "g61295";
C2366351	AUGUSTUS	CDS	1	177	0.74	-	1	transcript_id "g61296.t1"; gene_id "g61296";
C2366399	AUGUSTUS	CDS	18	177	0.78	+	0	transcript_id "g61297.t1"; gene_id "g61297";
C2366419	AUGUSTUS	CDS	9	177	0.19	-	1	transcript_id "g61298.t1"; gene_id "g61298";
C2366599	AUGUSTUS	exon	1	177	0.83	+	.	transcript_id "g61299.t1"; gene_id "g61299";
C2366599	AUGUSTUS	CDS	1	169	.	+	1	transcript_id "g61299.t1"; gene_id "g61299";
C2366677	AUGUSTUS	CDS	7	177	0.61	-	2	transcript_id "g61300.t1"; gene_id "g61300";
C2366733	AUGUSTUS	exon	33	166	0.7	+	.	transcript_id "g61301.t1"; gene_id "g61301";
C2366733	AUGUSTUS	CDS	33	142	.	+	2	transcript_id "g61301.t1"; gene_id "g61301";
C2366965	AUGUSTUS	CDS	6	177	0.87	+	0	transcript_id "g61302.t1"; gene_id "g61302";
C2367157	AUGUSTUS	exon	1	177	0.95	-	.	transcript_id "g61303.t1"; gene_id "g61303";
C2367157	AUGUSTUS	CDS	16	177	.	-	0	transcript_id "g61303.t1"; gene_id "g61303";
C2367257	AUGUSTUS	CDS	1	177	0.99	+	2	transcript_id "g61304.t1"; gene_id "g61304";
C2367341	AUGUSTUS	CDS	2	177	0.72	-	2	transcript_id "g61305.t1"; gene_id "g61305";
C2367391	AUGUSTUS	CDS	23	177	0.95	+	0	transcript_id "g61306.t1"; gene_id "g61306";
C2367441	AUGUSTUS	CDS	1	177	0.86	+	0	transcript_id "g61307.t1"; gene_id "g61307";
C2367561	AUGUSTUS	exon	1	177	0.66	-	.	transcript_id "g61308.t1"; gene_id "g61308";
C2367561	AUGUSTUS	CDS	17	177	.	-	2	transcript_id "g61308.t1"; gene_id "g61308";
C2367715	AUGUSTUS	CDS	1	177	0.63	+	1	transcript_id "g61309.t1"; gene_id "g61309";
C2367809	AUGUSTUS	CDS	33	177	0.92	-	0	transcript_id "g61310.t1"; gene_id "g61310";
C2368069	AUGUSTUS	exon	62	152	0.67	+	.	transcript_id "g61311.t1"; gene_id "g61311";
C2368069	AUGUSTUS	CDS	62	111	.	+	2	transcript_id "g61311.t1"; gene_id "g61311";
C2368559	AUGUSTUS	CDS	1	177	0.44	-	0	transcript_id "g61312.t1"; gene_id "g61312";
C2368771	AUGUSTUS	CDS	8	177	0.97	+	0	transcript_id "g61313.t1"; gene_id "g61313";
C2368873	AUGUSTUS	exon	1	167	0.91	-	.	transcript_id "g61314.t1"; gene_id "g61314";
C2368873	AUGUSTUS	CDS	18	167	.	-	0	transcript_id "g61314.t1"; gene_id "g61314";
C2369427	AUGUSTUS	CDS	8	178	0.61	+	0	transcript_id "g61315.t1"; gene_id "g61315";
C2369473	AUGUSTUS	CDS	19	178	0.61	+	0	transcript_id "g61316.t1"; gene_id "g61316";
C2369575	AUGUSTUS	exon	26	105	0.47	-	.	transcript_id "g61317.t1"; gene_id "g61317";
C2369575	AUGUSTUS	CDS	26	66	.	-	0	transcript_id "g61317.t1"; gene_id "g61317";
C2369901	AUGUSTUS	CDS	2	178	0.94	+	0	transcript_id "g61318.t1"; gene_id "g61318";
C2369995	AUGUSTUS	CDS	7	178	1	-	0	transcript_id "g61319.t1"; gene_id "g61319";
C2370055	AUGUSTUS	CDS	1	178	0.57	+	0	transcript_id "g61320.t1"; gene_id "g61320";
C2370081	AUGUSTUS	exon	1	178	0.74	+	.	transcript_id "g61321.t1"; gene_id "g61321";
C2370081	AUGUSTUS	CDS	1	174	.	+	0	transcript_id "g61321.t1"; gene_id "g61321";
C2370137	AUGUSTUS	CDS	12	173	0.58	+	0	transcript_id "g61322.t1"; gene_id "g61322";
C2370147	AUGUSTUS	CDS	1	178	0.62	+	0	transcript_id "g61323.t1"; gene_id "g61323";
C2370241	AUGUSTUS	exon	1	178	0.65	-	.	transcript_id "g61324.t1"; gene_id "g61324";
C2370241	AUGUSTUS	CDS	4	178	.	-	1	transcript_id "g61324.t1"; gene_id "g61324";
C2370401	AUGUSTUS	CDS	1	178	0.99	-	0	transcript_id "g61325.t1"; gene_id "g61325";
C2370441	AUGUSTUS	CDS	21	178	0.77	+	0	transcript_id "g61326.t1"; gene_id "g61326";
C2370507	AUGUSTUS	exon	1	178	0.75	-	.	transcript_id "g61327.t1"; gene_id "g61327";
C2370507	AUGUSTUS	CDS	16	178	.	-	1	transcript_id "g61327.t1"; gene_id "g61327";
C2370647	AUGUSTUS	CDS	19	178	0.65	+	0	transcript_id "g61328.t1"; gene_id "g61328";
C2370699	AUGUSTUS	exon	31	178	0.32	+	.	transcript_id "g61329.t1"; gene_id "g61329";
C2370699	AUGUSTUS	CDS	31	161	.	+	2	transcript_id "g61329.t1"; gene_id "g61329";
C2370731	AUGUSTUS	CDS	18	178	0.43	+	0	transcript_id "g61330.t1"; gene_id "g61330";
C2370741	AUGUSTUS	exon	1	162	0.6	+	.	transcript_id "g61331.t1"; gene_id "g61331";
C2370741	AUGUSTUS	CDS	1	119	.	+	2	transcript_id "g61331.t1"; gene_id "g61331";
C2370835	AUGUSTUS	exon	1	154	0.41	+	.	transcript_id "g61332.t1"; gene_id "g61332";
C2370835	AUGUSTUS	CDS	1	83	.	+	2	transcript_id "g61332.t1"; gene_id "g61332";
C2370869	AUGUSTUS	CDS	1	178	0.36	+	0	transcript_id "g61333.t1"; gene_id "g61333";
C2371039	AUGUSTUS	exon	1	178	0.68	-	.	transcript_id "g61334.t1"; gene_id "g61334";
C2371039	AUGUSTUS	CDS	46	178	.	-	1	transcript_id "g61334.t1"; gene_id "g61334";
C2371047	AUGUSTUS	exon	1	156	0.74	+	.	transcript_id "g61335.t1"; gene_id "g61335";
C2371047	AUGUSTUS	CDS	1	131	.	+	2	transcript_id "g61335.t1"; gene_id "g61335";
C2371383	AUGUSTUS	CDS	9	178	0.93	+	0	transcript_id "g61336.t1"; gene_id "g61336";
C2371425	AUGUSTUS	CDS	1	178	0.51	+	0	transcript_id "g61337.t1"; gene_id "g61337";
C2371449	AUGUSTUS	CDS	1	178	0.97	+	2	transcript_id "g61338.t1"; gene_id "g61338";
C2371601	AUGUSTUS	CDS	11	178	0.7	+	0	transcript_id "g61339.t1"; gene_id "g61339";
C2371629	AUGUSTUS	exon	1	178	0.99	-	.	transcript_id "g61340.t1"; gene_id "g61340";
C2371629	AUGUSTUS	CDS	19	178	.	-	1	transcript_id "g61340.t1"; gene_id "g61340";
C2371655	AUGUSTUS	CDS	18	178	1	+	0	transcript_id "g61341.t1"; gene_id "g61341";
C2371679	AUGUSTUS	CDS	1	178	0.7	+	2	transcript_id "g61342.t1"; gene_id "g61342";
C2371815	AUGUSTUS	CDS	1	178	0.51	-	2	transcript_id "g61343.t1"; gene_id "g61343";
C2371835	AUGUSTUS	CDS	4	178	0.9	+	0	transcript_id "g61344.t1"; gene_id "g61344";
C2372145	AUGUSTUS	CDS	1	178	0.4	+	1	transcript_id "g61345.t1"; gene_id "g61345";
C2372279	AUGUSTUS	exon	1	178	1	-	.	transcript_id "g61346.t1"; gene_id "g61346";
C2372279	AUGUSTUS	CDS	8	178	.	-	0	transcript_id "g61346.t1"; gene_id "g61346";
C2372327	AUGUSTUS	CDS	4	178	0.58	+	0	transcript_id "g61347.t1"; gene_id "g61347";
C2372471	AUGUSTUS	CDS	15	178	0.97	+	0	transcript_id "g61348.t1"; gene_id "g61348";
C2372493	AUGUSTUS	exon	1	178	0.86	-	.	transcript_id "g61349.t1"; gene_id "g61349";
C2372493	AUGUSTUS	CDS	22	178	.	-	1	transcript_id "g61349.t1"; gene_id "g61349";
C2372617	AUGUSTUS	exon	1	150	0.9	+	.	transcript_id "g61350.t1"; gene_id "g61350";
C2372617	AUGUSTUS	CDS	1	127	.	+	1	transcript_id "g61350.t1"; gene_id "g61350";
C2373133	AUGUSTUS	exon	1	178	0.97	-	.	transcript_id "g61351.t1"; gene_id "g61351";
C2373133	AUGUSTUS	CDS	34	178	.	-	1	transcript_id "g61351.t1"; gene_id "g61351";
C2373169	AUGUSTUS	exon	1	105	0.75	-	.	transcript_id "g61352.t1"; gene_id "g61352";
C2373169	AUGUSTUS	CDS	1	76	.	-	0	transcript_id "g61352.t1"; gene_id "g61352";
C2373229	AUGUSTUS	CDS	20	178	0.49	+	0	transcript_id "g61353.t1"; gene_id "g61353";
C2373259	AUGUSTUS	exon	1	125	0.5	-	.	transcript_id "g61354.t1"; gene_id "g61354";
C2373259	AUGUSTUS	CDS	1	97	.	-	0	transcript_id "g61354.t1"; gene_id "g61354";
C2373269	AUGUSTUS	exon	1	178	0.8	-	.	transcript_id "g61355.t1"; gene_id "g61355";
C2373269	AUGUSTUS	CDS	5	178	.	-	0	transcript_id "g61355.t1"; gene_id "g61355";
C2373707	AUGUSTUS	CDS	23	178	0.98	+	0	transcript_id "g61356.t1"; gene_id "g61356";
C2373723	AUGUSTUS	CDS	6	178	0.32	+	0	transcript_id "g61359.t1"; gene_id "g61359";
C2373725	AUGUSTUS	CDS	6	178	0.54	+	0	transcript_id "g61358.t1"; gene_id "g61358";
C2373735	AUGUSTUS	CDS	24	178	0.52	+	0	transcript_id "g61357.t1"; gene_id "g61357";
C2373741	AUGUSTUS	CDS	1	178	0.94	-	0	transcript_id "g61360.t1"; gene_id "g61360";
C2373799	AUGUSTUS	CDS	3	178	0.59	+	0	transcript_id "g61361.t1"; gene_id "g61361";
C2373985	AUGUSTUS	CDS	11	178	0.57	+	0	transcript_id "g61362.t1"; gene_id "g61362";
C2374063	AUGUSTUS	CDS	8	178	0.76	+	0	transcript_id "g61363.t1"; gene_id "g61363";
C2374211	AUGUSTUS	CDS	24	178	0.65	+	0	transcript_id "g61364.t1"; gene_id "g61364";
C2374263	AUGUSTUS	CDS	42	178	0.43	-	0	transcript_id "g61365.t1"; gene_id "g61365";
C2374385	AUGUSTUS	CDS	1	178	0.8	+	2	transcript_id "g61366.t1"; gene_id "g61366";
C2374515	AUGUSTUS	CDS	18	168	0.62	-	0	transcript_id "g61367.t1"; gene_id "g61367";
C2375071	AUGUSTUS	CDS	1	179	0.57	-	2	transcript_id "g61368.t1"; gene_id "g61368";
C2375113	AUGUSTUS	exon	58	125	0.59	-	.	transcript_id "g61369.t1"; gene_id "g61369";
C2375113	AUGUSTUS	CDS	58	98	.	-	0	transcript_id "g61369.t1"; gene_id "g61369";
C2375341	AUGUSTUS	CDS	16	179	0.48	+	0	transcript_id "g61370.t1"; gene_id "g61370";
C2375543	AUGUSTUS	CDS	1	179	0.98	+	2	transcript_id "g61371.t1"; gene_id "g61371";
C2375623	AUGUSTUS	CDS	19	179	0.93	+	0	transcript_id "g61372.t1"; gene_id "g61372";
C2375637	AUGUSTUS	CDS	7	179	0.95	+	0	transcript_id "g61373.t1"; gene_id "g61373";
C2375641	AUGUSTUS	CDS	1	179	0.59	+	2	transcript_id "g61374.t1"; gene_id "g61374";
C2376033	AUGUSTUS	exon	1	170	0.24	+	.	transcript_id "g61375.t1"; gene_id "g61375";
C2376033	AUGUSTUS	CDS	1	124	.	+	1	transcript_id "g61375.t1"; gene_id "g61375";
C2376071	AUGUSTUS	CDS	24	179	0.94	+	0	transcript_id "g61376.t1"; gene_id "g61376";
C2376109	AUGUSTUS	CDS	19	142	0.76	+	0	transcript_id "g61377.t1"; gene_id "g61377";
C2376149	AUGUSTUS	CDS	1	157	0.65	-	0	transcript_id "g61378.t1"; gene_id "g61378";
C2376353	AUGUSTUS	exon	1	160	0.95	+	.	transcript_id "g61379.t1"; gene_id "g61379";
C2376353	AUGUSTUS	CDS	1	129	.	+	0	transcript_id "g61379.t1"; gene_id "g61379";
C2376367	AUGUSTUS	exon	1	179	0.95	-	.	transcript_id "g61380.t1"; gene_id "g61380";
C2376367	AUGUSTUS	CDS	36	179	.	-	0	transcript_id "g61380.t1"; gene_id "g61380";
C2376661	AUGUSTUS	CDS	1	179	0.48	+	0	transcript_id "g61381.t1"; gene_id "g61381";
C2376715	AUGUSTUS	CDS	1	179	0.15	+	2	transcript_id "g61382.t1"; gene_id "g61382";
C2376729	AUGUSTUS	CDS	21	179	0.87	+	0	transcript_id "g61383.t1"; gene_id "g61383";
C2376737	AUGUSTUS	CDS	22	179	0.63	+	0	transcript_id "g61384.t1"; gene_id "g61384";
C2376829	AUGUSTUS	exon	1	170	0.94	+	.	transcript_id "g61385.t1"; gene_id "g61385";
C2376829	AUGUSTUS	CDS	1	138	.	+	0	transcript_id "g61385.t1"; gene_id "g61385";
C2376855	AUGUSTUS	CDS	3	174	0.83	+	0	transcript_id "g61386.t1"; gene_id "g61386";
C2376977	AUGUSTUS	exon	1	179	0.7	-	.	transcript_id "g61387.t1"; gene_id "g61387";
C2376977	AUGUSTUS	CDS	22	179	.	-	2	transcript_id "g61387.t1"; gene_id "g61387";
C2377061	AUGUSTUS	exon	7	115	0.4	-	.	transcript_id "g61388.t1"; gene_id "g61388";
C2377061	AUGUSTUS	CDS	7	36	.	-	0	transcript_id "g61388.t1"; gene_id "g61388";
C2377121	AUGUSTUS	exon	1	160	0.32	+	.	transcript_id "g61389.t1"; gene_id "g61389";
C2377121	AUGUSTUS	CDS	1	130	.	+	1	transcript_id "g61389.t1"; gene_id "g61389";
C2377307	AUGUSTUS	CDS	10	179	0.91	+	0	transcript_id "g61390.t1"; gene_id "g61390";
C2377405	AUGUSTUS	CDS	15	179	0.77	+	0	transcript_id "g61391.t1"; gene_id "g61391";
C2377703	AUGUSTUS	CDS	1	179	0.2	+	1	transcript_id "g61392.t1"; gene_id "g61392";
C2377887	AUGUSTUS	CDS	21	179	0.53	+	0	transcript_id "g61393.t1"; gene_id "g61393";
C2377965	AUGUSTUS	CDS	19	179	0.94	+	0	transcript_id "g61394.t1"; gene_id "g61394";
C2377987	AUGUSTUS	CDS	16	179	0.98	+	0	transcript_id "g61395.t1"; gene_id "g61395";
C2378087	AUGUSTUS	exon	1	130	0.84	+	.	transcript_id "g61396.t1"; gene_id "g61396";
C2378087	AUGUSTUS	CDS	1	107	.	+	2	transcript_id "g61396.t1"; gene_id "g61396";
C2378099	AUGUSTUS	CDS	7	169	0.8	-	1	transcript_id "g61397.t1"; gene_id "g61397";
C2378121	AUGUSTUS	CDS	23	179	0.94	+	0	transcript_id "g61398.t1"; gene_id "g61398";
C2378129	AUGUSTUS	CDS	2	179	0.64	-	1	transcript_id "g61399.t1"; gene_id "g61399";
C2378277	AUGUSTUS	CDS	1	179	0.49	-	2	transcript_id "g61400.t1"; gene_id "g61400";
C2378459	AUGUSTUS	CDS	1	179	0.52	-	2	transcript_id "g61401.t1"; gene_id "g61401";
C2378471	AUGUSTUS	exon	1	179	0.93	-	.	transcript_id "g61402.t1"; gene_id "g61402";
C2378471	AUGUSTUS	CDS	18	179	.	-	0	transcript_id "g61402.t1"; gene_id "g61402";
C2378481	AUGUSTUS	CDS	7	179	0.54	-	1	transcript_id "g61403.t1"; gene_id "g61403";
C2378485	AUGUSTUS	CDS	1	179	0.32	-	1	transcript_id "g61404.t1"; gene_id "g61404";
C2378539	AUGUSTUS	CDS	1	148	0.49	+	0	transcript_id "g61405.t1"; gene_id "g61405";
C2378681	AUGUSTUS	exon	8	105	0.29	-	.	transcript_id "g61406.t1"; gene_id "g61406";
C2378681	AUGUSTUS	CDS	8	29	.	-	0	transcript_id "g61406.t1"; gene_id "g61406";
C2378829	AUGUSTUS	CDS	1	179	0.24	+	2	transcript_id "g61407.t1"; gene_id "g61407";
C2378921	AUGUSTUS	exon	1	115	0.41	-	.	transcript_id "g61409.t1"; gene_id "g61409";
C2378921	AUGUSTUS	CDS	1	46	.	-	0	transcript_id "g61409.t1"; gene_id "g61409";
C2378925	AUGUSTUS	CDS	1	179	0.72	-	1	transcript_id "g61408.t1"; gene_id "g61408";
C2379303	AUGUSTUS	CDS	1	179	0.31	-	0	transcript_id "g61410.t1"; gene_id "g61410";
C2379417	AUGUSTUS	CDS	1	179	0.62	-	1	transcript_id "g61411.t1"; gene_id "g61411";
C2379513	AUGUSTUS	exon	1	179	0.87	-	.	transcript_id "g61412.t1"; gene_id "g61412";
C2379513	AUGUSTUS	CDS	11	179	.	-	1	transcript_id "g61412.t1"; gene_id "g61412";
C2379535	AUGUSTUS	exon	11	179	0.75	+	.	transcript_id "g61413.t1"; gene_id "g61413";
C2379535	AUGUSTUS	CDS	40	179	.	+	0	transcript_id "g61413.t1"; gene_id "g61413";
C2379623	AUGUSTUS	exon	13	179	0.81	+	.	transcript_id "g61414.t1"; gene_id "g61414";
C2379623	AUGUSTUS	CDS	40	179	.	+	0	transcript_id "g61414.t1"; gene_id "g61414";
C2379641	AUGUSTUS	CDS	23	179	0.47	+	0	transcript_id "g61415.t1"; gene_id "g61415";
C2379731	AUGUSTUS	CDS	16	179	0.83	+	0	transcript_id "g61416.t1"; gene_id "g61416";
C2379737	AUGUSTUS	CDS	6	179	0.79	+	0	transcript_id "g61417.t1"; gene_id "g61417";
C2380201	AUGUSTUS	CDS	19	180	0.46	-	0	transcript_id "g61418.t1"; gene_id "g61418";
C2380507	AUGUSTUS	CDS	23	180	0.55	+	0	transcript_id "g61419.t1"; gene_id "g61419";
C2380771	AUGUSTUS	CDS	10	180	0.69	+	0	transcript_id "g61420.t1"; gene_id "g61420";
C2380871	AUGUSTUS	exon	25	135	0.41	+	.	transcript_id "g61421.t1"; gene_id "g61421";
C2380871	AUGUSTUS	CDS	25	112	.	+	1	transcript_id "g61421.t1"; gene_id "g61421";
C2380993	AUGUSTUS	CDS	3	180	0.98	+	0	transcript_id "g61422.t1"; gene_id "g61422";
C2381125	AUGUSTUS	exon	1	170	0.32	+	.	transcript_id "g61423.t1"; gene_id "g61423";
C2381125	AUGUSTUS	CDS	1	123	.	+	0	transcript_id "g61423.t1"; gene_id "g61423";
C2381145	AUGUSTUS	exon	1	121	0.79	+	.	transcript_id "g61424.t1"; gene_id "g61424";
C2381145	AUGUSTUS	CDS	1	100	.	+	1	transcript_id "g61424.t1"; gene_id "g61424";
C2381271	AUGUSTUS	CDS	22	180	0.84	+	0	transcript_id "g61425.t1"; gene_id "g61425";
C2381279	AUGUSTUS	exon	1	150	0.3	+	.	transcript_id "g61426.t1"; gene_id "g61426";
C2381279	AUGUSTUS	CDS	1	130	.	+	1	transcript_id "g61426.t1"; gene_id "g61426";
C2381743	AUGUSTUS	CDS	1	180	0.47	-	1	transcript_id "g61427.t1"; gene_id "g61427";
C2381753	AUGUSTUS	CDS	1	170	0.61	-	1	transcript_id "g61428.t1"; gene_id "g61428";
C2382017	AUGUSTUS	exon	1	180	0.92	-	.	transcript_id "g61429.t1"; gene_id "g61429";
C2382017	AUGUSTUS	CDS	17	180	.	-	2	transcript_id "g61429.t1"; gene_id "g61429";
C2382055	AUGUSTUS	CDS	1	180	0.63	+	0	transcript_id "g61430.t1"; gene_id "g61430";
C2382163	AUGUSTUS	CDS	3	180	1	+	0	transcript_id "g61431.t1"; gene_id "g61431";
C2382197	AUGUSTUS	exon	1	180	0.63	+	.	transcript_id "g61432.t1"; gene_id "g61432";
C2382197	AUGUSTUS	CDS	1	177	.	+	0	transcript_id "g61432.t1"; gene_id "g61432";
C2382199	AUGUSTUS	CDS	23	180	0.63	+	0	transcript_id "g61434.t1"; gene_id "g61434";
C2382267	AUGUSTUS	exon	1	170	0.43	+	.	transcript_id "g61433.t1"; gene_id "g61433";
C2382267	AUGUSTUS	CDS	1	141	.	+	0	transcript_id "g61433.t1"; gene_id "g61433";
C2382385	AUGUSTUS	exon	1	180	0.91	-	.	transcript_id "g61436.t1"; gene_id "g61436";
C2382385	AUGUSTUS	CDS	12	180	.	-	1	transcript_id "g61436.t1"; gene_id "g61436";
C2382391	AUGUSTUS	CDS	1	180	0.84	-	0	transcript_id "g61435.t1"; gene_id "g61435";
C2382405	AUGUSTUS	CDS	12	180	0.56	+	0	transcript_id "g61437.t1"; gene_id "g61437";
C2382647	AUGUSTUS	CDS	1	180	0.36	+	1	transcript_id "g61438.t1"; gene_id "g61438";
C2382785	AUGUSTUS	CDS	11	180	0.81	+	0	transcript_id "g61439.t1"; gene_id "g61439";
C2382853	AUGUSTUS	exon	1	180	0.89	-	.	transcript_id "g61440.t1"; gene_id "g61440";
C2382853	AUGUSTUS	CDS	21	180	.	-	1	transcript_id "g61440.t1"; gene_id "g61440";
C2382885	AUGUSTUS	CDS	7	180	0.65	-	0	transcript_id "g61441.t1"; gene_id "g61441";
C2382913	AUGUSTUS	CDS	10	180	0.99	+	0	transcript_id "g61442.t1"; gene_id "g61442";
C2382963	AUGUSTUS	exon	6	175	0.69	+	.	transcript_id "g61443.t1"; gene_id "g61443";
C2382963	AUGUSTUS	CDS	34	175	.	+	0	transcript_id "g61443.t1"; gene_id "g61443";
C2383137	AUGUSTUS	CDS	22	180	0.5	-	1	transcript_id "g61444.t1"; gene_id "g61444";
C2383189	AUGUSTUS	exon	1	180	0.74	-	.	transcript_id "g61445.t1"; gene_id "g61445";
C2383189	AUGUSTUS	CDS	21	180	.	-	1	transcript_id "g61445.t1"; gene_id "g61445";
C2383361	AUGUSTUS	exon	1	180	0.91	-	.	transcript_id "g61446.t1"; gene_id "g61446";
C2383361	AUGUSTUS	CDS	19	180	.	-	0	transcript_id "g61446.t1"; gene_id "g61446";
C2383383	AUGUSTUS	CDS	19	142	0.39	+	0	transcript_id "g61447.t1"; gene_id "g61447";
C2383437	AUGUSTUS	CDS	1	180	0.85	-	0	transcript_id "g61448.t1"; gene_id "g61448";
C2383629	AUGUSTUS	exon	22	168	0.42	+	.	transcript_id "g61449.t1"; gene_id "g61449";
C2383629	AUGUSTUS	CDS	22	167	.	+	2	transcript_id "g61449.t1"; gene_id "g61449";
C2383743	AUGUSTUS	exon	25	127	0.33	+	.	transcript_id "g61450.t1"; gene_id "g61450";
C2383743	AUGUSTUS	CDS	25	77	.	+	2	transcript_id "g61450.t1"; gene_id "g61450";
C2383879	AUGUSTUS	exon	1	160	0.53	+	.	transcript_id "g61451.t1"; gene_id "g61451";
C2383879	AUGUSTUS	CDS	1	129	.	+	0	transcript_id "g61451.t1"; gene_id "g61451";
C2383883	AUGUSTUS	CDS	27	158	0.47	-	0	transcript_id "g61452.t1"; gene_id "g61452";
C2383905	AUGUSTUS	exon	1	150	0.43	+	.	transcript_id "g61453.t1"; gene_id "g61453";
C2383905	AUGUSTUS	CDS	1	129	.	+	0	transcript_id "g61453.t1"; gene_id "g61453";
C2384087	AUGUSTUS	CDS	1	180	0.76	-	1	transcript_id "g61455.t1"; gene_id "g61455";
C2384091	AUGUSTUS	CDS	15	180	0.95	+	0	transcript_id "g61454.t1"; gene_id "g61454";
C2384211	AUGUSTUS	exon	1	95	0.49	-	.	transcript_id "g61456.t1"; gene_id "g61456";
C2384211	AUGUSTUS	CDS	1	65	.	-	0	transcript_id "g61456.t1"; gene_id "g61456";
C2384551	AUGUSTUS	exon	1	180	1	-	.	transcript_id "g61457.t1"; gene_id "g61457";
C2384551	AUGUSTUS	CDS	28	180	.	-	0	transcript_id "g61457.t1"; gene_id "g61457";
C2384663	AUGUSTUS	CDS	1	180	0.54	+	0	transcript_id "g61458.t1"; gene_id "g61458";
C2384691	AUGUSTUS	CDS	2	180	0.68	+	0	transcript_id "g61459.t1"; gene_id "g61459";
C2384713	AUGUSTUS	CDS	13	180	0.95	+	0	transcript_id "g61460.t1"; gene_id "g61460";
C2384859	AUGUSTUS	CDS	1	135	0.4	-	0	transcript_id "g61462.t1"; gene_id "g61462";
C2384861	AUGUSTUS	exon	1	134	0.93	-	.	transcript_id "g61461.t1"; gene_id "g61461";
C2384861	AUGUSTUS	CDS	38	134	.	-	1	transcript_id "g61461.t1"; gene_id "g61461";
C2385505	AUGUSTUS	CDS	1	181	0.54	-	1	transcript_id "g61463.t1"; gene_id "g61463";
C2385891	AUGUSTUS	CDS	1	181	0.55	+	0	transcript_id "g61464.t1"; gene_id "g61464";
C2386071	AUGUSTUS	exon	1	181	0.99	-	.	transcript_id "g61465.t1"; gene_id "g61465";
C2386071	AUGUSTUS	CDS	29	181	.	-	0	transcript_id "g61465.t1"; gene_id "g61465";
C2386147	AUGUSTUS	exon	1	181	0.84	-	.	transcript_id "g61466.t1"; gene_id "g61466";
C2386147	AUGUSTUS	CDS	16	181	.	-	1	transcript_id "g61466.t1"; gene_id "g61466";
C2386161	AUGUSTUS	exon	1	171	0.39	-	.	transcript_id "g61467.t1"; gene_id "g61467";
C2386161	AUGUSTUS	CDS	65	171	.	-	2	transcript_id "g61467.t1"; gene_id "g61467";
C2386185	AUGUSTUS	exon	2	181	0.76	+	.	transcript_id "g61468.t1"; gene_id "g61468";
C2386185	AUGUSTUS	CDS	31	181	.	+	0	transcript_id "g61468.t1"; gene_id "g61468";
C2386291	AUGUSTUS	CDS	1	181	0.51	-	1	transcript_id "g61469.t1"; gene_id "g61469";
C2386385	AUGUSTUS	exon	7	125	0.42	-	.	transcript_id "g61470.t1"; gene_id "g61470";
C2386385	AUGUSTUS	CDS	7	49	.	-	0	transcript_id "g61470.t1"; gene_id "g61470";
C2386519	AUGUSTUS	CDS	7	181	0.97	+	0	transcript_id "g61471.t1"; gene_id "g61471";
C2387039	AUGUSTUS	CDS	1	181	0.9	+	0	transcript_id "g61472.t1"; gene_id "g61472";
C2387095	AUGUSTUS	CDS	23	181	0.83	+	0	transcript_id "g61473.t1"; gene_id "g61473";
C2387293	AUGUSTUS	CDS	1	181	0.92	-	2	transcript_id "g61474.t1"; gene_id "g61474";
C2387317	AUGUSTUS	exon	1	181	0.91	-	.	transcript_id "g61475.t1"; gene_id "g61475";
C2387317	AUGUSTUS	CDS	66	181	.	-	2	transcript_id "g61475.t1"; gene_id "g61475";
C2387351	AUGUSTUS	exon	1	180	0.6	+	.	transcript_id "g61476.t1"; gene_id "g61476";
C2387351	AUGUSTUS	CDS	1	115	.	+	1	transcript_id "g61476.t1"; gene_id "g61476";
C2387867	AUGUSTUS	exon	1	181	0.78	-	.	transcript_id "g61477.t1"; gene_id "g61477";
C2387867	AUGUSTUS	CDS	5	181	.	-	0	transcript_id "g61477.t1"; gene_id "g61477";
C2388051	AUGUSTUS	CDS	21	181	0.99	+	0	transcript_id "g61478.t1"; gene_id "g61478";
C2388267	AUGUSTUS	CDS	1	181	0.77	+	2	transcript_id "g61479.t1"; gene_id "g61479";
C2388279	AUGUSTUS	CDS	11	181	0.84	+	0	transcript_id "g61480.t1"; gene_id "g61480";
C2388293	AUGUSTUS	exon	1	181	0.99	-	.	transcript_id "g61481.t1"; gene_id "g61481";
C2388293	AUGUSTUS	CDS	4	181	.	-	1	transcript_id "g61481.t1"; gene_id "g61481";
C2388415	AUGUSTUS	CDS	1	181	0.37	-	1	transcript_id "g61482.t1"; gene_id "g61482";
C2388729	AUGUSTUS	CDS	1	181	0.78	+	1	transcript_id "g61483.t1"; gene_id "g61483";
C2388857	AUGUSTUS	exon	1	135	0.46	-	.	transcript_id "g61484.t1"; gene_id "g61484";
C2388857	AUGUSTUS	CDS	1	106	.	-	0	transcript_id "g61484.t1"; gene_id "g61484";
C2388863	AUGUSTUS	CDS	8	176	0.79	+	0	transcript_id "g61485.t1"; gene_id "g61485";
C2389003	AUGUSTUS	exon	1	181	0.91	-	.	transcript_id "g61486.t1"; gene_id "g61486";
C2389003	AUGUSTUS	CDS	56	181	.	-	0	transcript_id "g61486.t1"; gene_id "g61486";
C2389005	AUGUSTUS	CDS	1	181	0.54	-	0	transcript_id "g61487.t1"; gene_id "g61487";
C2389083	AUGUSTUS	CDS	13	181	0.96	+	0	transcript_id "g61488.t1"; gene_id "g61488";
C2389167	AUGUSTUS	CDS	14	181	0.64	+	0	transcript_id "g61489.t1"; gene_id "g61489";
C2389195	AUGUSTUS	CDS	7	181	0.56	+	0	transcript_id "g61490.t1"; gene_id "g61490";
C2389241	AUGUSTUS	exon	1	180	0.41	+	.	transcript_id "g61491.t1"; gene_id "g61491";
C2389241	AUGUSTUS	CDS	1	153	.	+	0	transcript_id "g61491.t1"; gene_id "g61491";
C2389307	AUGUSTUS	CDS	43	181	0.51	-	0	transcript_id "g61492.t1"; gene_id "g61492";
C2389827	AUGUSTUS	CDS	1	181	0.87	+	1	transcript_id "g61493.t1"; gene_id "g61493";
C2389947	AUGUSTUS	exon	1	171	0.79	-	.	transcript_id "g61494.t1"; gene_id "g61494";
C2389947	AUGUSTUS	CDS	22	171	.	-	0	transcript_id "g61494.t1"; gene_id "g61494";
C2390057	AUGUSTUS	CDS	1	181	0.53	+	0	transcript_id "g61496.t1"; gene_id "g61496";
C2390065	AUGUSTUS	CDS	1	181	0.86	+	1	transcript_id "g61495.t1"; gene_id "g61495";
C2390067	AUGUSTUS	CDS	1	181	0.58	+	1	transcript_id "g61497.t1"; gene_id "g61497";
C2390081	AUGUSTUS	exon	1	180	0.36	+	.	transcript_id "g61498.t1"; gene_id "g61498";
C2390081	AUGUSTUS	CDS	1	144	.	+	0	transcript_id "g61498.t1"; gene_id "g61498";
C2390083	AUGUSTUS	exon	1	180	0.59	+	.	transcript_id "g61499.t1"; gene_id "g61499";
C2390083	AUGUSTUS	CDS	1	144	.	+	0	transcript_id "g61499.t1"; gene_id "g61499";
C2392373	AUGUSTUS	CDS	1	182	0.49	+	0	transcript_id "g61500.t1"; gene_id "g61500";
C2392681	AUGUSTUS	CDS	1	182	0.52	-	1	transcript_id "g61501.t1"; gene_id "g61501";
C2393479	AUGUSTUS	CDS	66	177	0.85	+	0	transcript_id "g61502.t1"; gene_id "g61502";
C2393519	AUGUSTUS	CDS	1	182	0.65	+	0	transcript_id "g61503.t1"; gene_id "g61503";
C2393533	AUGUSTUS	CDS	10	182	0.56	+	0	transcript_id "g61504.t1"; gene_id "g61504";
C2393611	AUGUSTUS	CDS	1	182	0.81	-	1	transcript_id "g61505.t1"; gene_id "g61505";
C2393675	AUGUSTUS	CDS	18	182	0.98	+	0	transcript_id "g61506.t1"; gene_id "g61506";
C2393847	AUGUSTUS	exon	1	182	0.49	+	.	transcript_id "g61507.t1"; gene_id "g61507";
C2393847	AUGUSTUS	CDS	1	175	.	+	1	transcript_id "g61507.t1"; gene_id "g61507";
C2394017	AUGUSTUS	exon	1	113	0.54	+	.	transcript_id "g61508.t1"; gene_id "g61508";
C2394017	AUGUSTUS	CDS	1	80	.	+	2	transcript_id "g61508.t1"; gene_id "g61508";
C2394341	AUGUSTUS	CDS	7	160	0.88	-	0	transcript_id "g61509.t1"; gene_id "g61509";
C2394387	AUGUSTUS	CDS	12	182	0.82	+	0	transcript_id "g61510.t1"; gene_id "g61510";
C2394393	AUGUSTUS	exon	1	182	0.9	-	.	transcript_id "g61511.t1"; gene_id "g61511";
C2394393	AUGUSTUS	CDS	22	182	.	-	2	transcript_id "g61511.t1"; gene_id "g61511";
C2394575	AUGUSTUS	CDS	1	182	0.72	-	0	transcript_id "g61512.t1"; gene_id "g61512";
C2394821	AUGUSTUS	exon	1	180	0.35	+	.	transcript_id "g61513.t1"; gene_id "g61513";
C2394821	AUGUSTUS	CDS	1	143	.	+	2	transcript_id "g61513.t1"; gene_id "g61513";
C2394841	AUGUSTUS	CDS	6	182	0.85	+	0	transcript_id "g61514.t1"; gene_id "g61514";
C2394935	AUGUSTUS	CDS	1	182	0.4	-	0	transcript_id "g61515.t1"; gene_id "g61515";
C2395507	AUGUSTUS	CDS	18	183	0.56	+	0	transcript_id "g61516.t1"; gene_id "g61516";
C2395649	AUGUSTUS	exon	1	173	0.96	-	.	transcript_id "g61517.t1"; gene_id "g61517";
C2395649	AUGUSTUS	CDS	31	173	.	-	2	transcript_id "g61517.t1"; gene_id "g61517";
C2395749	AUGUSTUS	CDS	18	183	0.81	+	0	transcript_id "g61518.t1"; gene_id "g61518";
C2395827	AUGUSTUS	exon	1	183	0.97	-	.	transcript_id "g61519.t1"; gene_id "g61519";
C2395827	AUGUSTUS	CDS	39	183	.	-	1	transcript_id "g61519.t1"; gene_id "g61519";
C2395949	AUGUSTUS	exon	1	148	0.52	+	.	transcript_id "g61520.t1"; gene_id "g61520";
C2395949	AUGUSTUS	CDS	1	120	.	+	0	transcript_id "g61520.t1"; gene_id "g61520";
C2396115	AUGUSTUS	exon	7	115	0.68	-	.	transcript_id "g61521.t1"; gene_id "g61521";
C2396115	AUGUSTUS	CDS	7	85	.	-	0	transcript_id "g61521.t1"; gene_id "g61521";
C2396165	AUGUSTUS	CDS	1	183	0.89	-	0	transcript_id "g61522.t1"; gene_id "g61522";
C2396175	AUGUSTUS	CDS	16	183	0.99	+	0	transcript_id "g61523.t1"; gene_id "g61523";
C2396339	AUGUSTUS	CDS	8	183	0.82	+	0	transcript_id "g61524.t1"; gene_id "g61524";
C2396575	AUGUSTUS	exon	1	183	0.91	-	.	transcript_id "g61525.t1"; gene_id "g61525";
C2396575	AUGUSTUS	CDS	9	183	.	-	1	transcript_id "g61525.t1"; gene_id "g61525";
C2396729	AUGUSTUS	CDS	19	183	0.67	+	0	transcript_id "g61526.t1"; gene_id "g61526";
C2396737	AUGUSTUS	CDS	1	183	0.6	+	2	transcript_id "g61527.t1"; gene_id "g61527";
C2396943	AUGUSTUS	CDS	1	183	0.51	-	0	transcript_id "g61528.t1"; gene_id "g61528";
C2396973	AUGUSTUS	CDS	1	161	0.36	-	0	transcript_id "g61529.t1"; gene_id "g61529";
C2396997	AUGUSTUS	CDS	1	183	0.62	+	2	transcript_id "g61530.t1"; gene_id "g61530";
C2397311	AUGUSTUS	CDS	23	183	0.75	+	0	transcript_id "g61531.t1"; gene_id "g61531";
C2397507	AUGUSTUS	exon	1	160	0.39	+	.	transcript_id "g61532.t1"; gene_id "g61532";
C2397507	AUGUSTUS	CDS	1	134	.	+	2	transcript_id "g61532.t1"; gene_id "g61532";
C2397593	AUGUSTUS	CDS	1	183	0.24	+	0	transcript_id "g61533.t1"; gene_id "g61533";
C2397639	AUGUSTUS	CDS	1	183	0.72	-	1	transcript_id "g61534.t1"; gene_id "g61534";
C2397703	AUGUSTUS	CDS	6	183	0.77	+	0	transcript_id "g61535.t1"; gene_id "g61535";
C2397759	AUGUSTUS	CDS	12	183	0.66	+	0	transcript_id "g61536.t1"; gene_id "g61536";
C2398231	AUGUSTUS	exon	1	183	0.92	-	.	transcript_id "g61537.t1"; gene_id "g61537";
C2398231	AUGUSTUS	CDS	20	183	.	-	2	transcript_id "g61537.t1"; gene_id "g61537";
C2398461	AUGUSTUS	CDS	1	183	0.77	+	2	transcript_id "g61538.t1"; gene_id "g61538";
C2398625	AUGUSTUS	exon	1	183	0.64	-	.	transcript_id "g61539.t1"; gene_id "g61539";
C2398625	AUGUSTUS	CDS	6	183	.	-	1	transcript_id "g61539.t1"; gene_id "g61539";
C2398673	AUGUSTUS	exon	17	183	0.7	+	.	transcript_id "g61540.t1"; gene_id "g61540";
C2398673	AUGUSTUS	CDS	17	181	.	+	0	transcript_id "g61540.t1"; gene_id "g61540";
C2398699	AUGUSTUS	exon	7	135	0.4	-	.	transcript_id "g61541.t1"; gene_id "g61541";
C2398699	AUGUSTUS	CDS	7	87	.	-	0	transcript_id "g61541.t1"; gene_id "g61541";
C2398713	AUGUSTUS	CDS	22	183	0.91	+	0	transcript_id "g61542.t1"; gene_id "g61542";
C2398801	AUGUSTUS	exon	1	183	0.9	-	.	transcript_id "g61543.t1"; gene_id "g61543";
C2398801	AUGUSTUS	CDS	18	183	.	-	1	transcript_id "g61543.t1"; gene_id "g61543";
C2398961	AUGUSTUS	CDS	22	183	0.89	+	0	transcript_id "g61544.t1"; gene_id "g61544";
C2398991	AUGUSTUS	CDS	1	183	0.41	-	0	transcript_id "g61545.t1"; gene_id "g61545";
C2399065	AUGUSTUS	exon	5	183	0.8	+	.	transcript_id "g61546.t1"; gene_id "g61546";
C2399065	AUGUSTUS	CDS	37	183	.	+	0	transcript_id "g61546.t1"; gene_id "g61546";
C2399243	AUGUSTUS	exon	7	85	0.48	-	.	transcript_id "g61547.t1"; gene_id "g61547";
C2399243	AUGUSTUS	CDS	7	51	.	-	0	transcript_id "g61547.t1"; gene_id "g61547";
C2399293	AUGUSTUS	exon	1	183	0.87	-	.	transcript_id "g61548.t1"; gene_id "g61548";
C2399293	AUGUSTUS	CDS	57	183	.	-	1	transcript_id "g61548.t1"; gene_id "g61548";
C2400013	AUGUSTUS	CDS	1	183	0.84	+	1	transcript_id "g61549.t1"; gene_id "g61549";
C2400599	AUGUSTUS	CDS	10	184	0.84	-	1	transcript_id "g61550.t1"; gene_id "g61550";
C2400641	AUGUSTUS	CDS	8	184	0.92	+	0	transcript_id "g61551.t1"; gene_id "g61551";
C2400643	AUGUSTUS	exon	1	85	0.17	-	.	transcript_id "g61552.t1"; gene_id "g61552";
C2400643	AUGUSTUS	CDS	1	36	.	-	0	transcript_id "g61552.t1"; gene_id "g61552";
C2400863	AUGUSTUS	exon	1	184	1	-	.	transcript_id "g61553.t1"; gene_id "g61553";
C2400863	AUGUSTUS	CDS	18	184	.	-	2	transcript_id "g61553.t1"; gene_id "g61553";
C2400977	AUGUSTUS	CDS	2	184	0.71	+	0	transcript_id "g61554.t1"; gene_id "g61554";
C2401001	AUGUSTUS	CDS	2	184	0.59	+	0	transcript_id "g61555.t1"; gene_id "g61555";
C2401113	AUGUSTUS	exon	1	180	0.41	+	.	transcript_id "g61556.t1"; gene_id "g61556";
C2401113	AUGUSTUS	CDS	1	120	.	+	0	transcript_id "g61556.t1"; gene_id "g61556";
C2401141	AUGUSTUS	CDS	1	184	0.74	-	2	transcript_id "g61557.t1"; gene_id "g61557";
C2401155	AUGUSTUS	exon	2	184	0.36	+	.	transcript_id "g61558.t1"; gene_id "g61558";
C2401155	AUGUSTUS	CDS	28	184	.	+	0	transcript_id "g61558.t1"; gene_id "g61558";
C2401163	AUGUSTUS	CDS	1	184	0.49	+	0	transcript_id "g61559.t1"; gene_id "g61559";
C2401165	AUGUSTUS	CDS	1	184	0.52	+	2	transcript_id "g61560.t1"; gene_id "g61560";
C2401417	AUGUSTUS	CDS	15	184	0.97	+	0	transcript_id "g61561.t1"; gene_id "g61561";
C2401453	AUGUSTUS	exon	1	174	0.56	-	.	transcript_id "g61562.t1"; gene_id "g61562";
C2401453	AUGUSTUS	CDS	19	174	.	-	0	transcript_id "g61562.t1"; gene_id "g61562";
C2401501	AUGUSTUS	CDS	7	184	0.99	-	1	transcript_id "g61563.t1"; gene_id "g61563";
C2401575	AUGUSTUS	CDS	22	184	0.52	+	0	transcript_id "g61564.t1"; gene_id "g61564";
C2401621	AUGUSTUS	exon	1	184	0.7	-	.	transcript_id "g61565.t1"; gene_id "g61565";
C2401621	AUGUSTUS	CDS	26	184	.	-	0	transcript_id "g61565.t1"; gene_id "g61565";
C2401647	AUGUSTUS	CDS	18	184	0.31	+	1	transcript_id "g61566.t1"; gene_id "g61566";
C2401699	AUGUSTUS	exon	1	184	0.87	-	.	transcript_id "g61567.t1"; gene_id "g61567";
C2401699	AUGUSTUS	CDS	19	184	.	-	1	transcript_id "g61567.t1"; gene_id "g61567";
C2401703	AUGUSTUS	CDS	10	184	0.98	+	0	transcript_id "g61568.t1"; gene_id "g61568";
C2401905	AUGUSTUS	exon	7	125	0.62	-	.	transcript_id "g61569.t1"; gene_id "g61569";
C2401905	AUGUSTUS	CDS	7	99	.	-	0	transcript_id "g61569.t1"; gene_id "g61569";
C2401923	AUGUSTUS	CDS	1	184	0.63	-	1	transcript_id "g61570.t1"; gene_id "g61570";
C2401953	AUGUSTUS	CDS	1	184	0.48	-	1	transcript_id "g61572.t1"; gene_id "g61572";
C2401955	AUGUSTUS	CDS	1	184	0.5	-	1	transcript_id "g61571.t1"; gene_id "g61571";
C2401981	AUGUSTUS	CDS	1	162	0.43	-	0	transcript_id "g61573.t1"; gene_id "g61573";
C2402215	AUGUSTUS	CDS	1	184	0.87	+	0	transcript_id "g61574.t1"; gene_id "g61574";
C2402259	AUGUSTUS	CDS	10	184	0.66	+	0	transcript_id "g61575.t1"; gene_id "g61575";
C2402285	AUGUSTUS	CDS	1	179	0.84	+	0	transcript_id "g61576.t1"; gene_id "g61576";
C2402421	AUGUSTUS	CDS	3	184	0.81	+	0	transcript_id "g61577.t1"; gene_id "g61577";
C2402501	AUGUSTUS	exon	16	184	0.7	+	.	transcript_id "g61578.t1"; gene_id "g61578";
C2402501	AUGUSTUS	CDS	43	184	.	+	0	transcript_id "g61578.t1"; gene_id "g61578";
C2402517	AUGUSTUS	CDS	7	184	0.75	-	1	transcript_id "g61579.t1"; gene_id "g61579";
C2402667	AUGUSTUS	CDS	34	184	0.68	-	1	transcript_id "g61581.t1"; gene_id "g61581";
C2402687	AUGUSTUS	CDS	1	184	0.31	-	2	transcript_id "g61580.t1"; gene_id "g61580";
C2402701	AUGUSTUS	exon	1	184	0.27	+	.	transcript_id "g61582.t1"; gene_id "g61582";
C2402701	AUGUSTUS	CDS	1	182	.	+	2	transcript_id "g61582.t1"; gene_id "g61582";
C2402917	AUGUSTUS	exon	1	184	0.7	-	.	transcript_id "g61583.t1"; gene_id "g61583";
C2402917	AUGUSTUS	CDS	98	184	.	-	0	transcript_id "g61583.t1"; gene_id "g61583";
C2403041	AUGUSTUS	CDS	17	184	0.54	+	0	transcript_id "g61585.t1"; gene_id "g61585";
C2403043	AUGUSTUS	CDS	17	184	0.84	+	0	transcript_id "g61584.t1"; gene_id "g61584";
C2403095	AUGUSTUS	exon	7	125	0.89	-	.	transcript_id "g61587.t1"; gene_id "g61587";
C2403095	AUGUSTUS	CDS	7	63	.	-	0	transcript_id "g61587.t1"; gene_id "g61587";
C2403107	AUGUSTUS	CDS	1	184	1	-	1	transcript_id "g61586.t1"; gene_id "g61586";
C2403177	AUGUSTUS	exon	1	184	0.42	+	.	transcript_id "g61588.t1"; gene_id "g61588";
C2403177	AUGUSTUS	CDS	1	177	.	+	0	transcript_id "g61588.t1"; gene_id "g61588";
C2403615	AUGUSTUS	CDS	23	184	0.68	+	0	transcript_id "g61589.t1"; gene_id "g61589";
C2403655	AUGUSTUS	CDS	5	184	1	+	0	transcript_id "g61590.t1"; gene_id "g61590";
C2403839	AUGUSTUS	CDS	14	184	0.49	+	0	transcript_id "g61591.t1"; gene_id "g61591";
C2403931	AUGUSTUS	CDS	1	184	0.87	+	1	transcript_id "g61592.t1"; gene_id "g61592";
C2403957	AUGUSTUS	CDS	17	184	0.68	+	0	transcript_id "g61593.t1"; gene_id "g61593";
C2404013	AUGUSTUS	CDS	1	184	0.61	+	1	transcript_id "g61594.t1"; gene_id "g61594";
C2404047	AUGUSTUS	exon	1	184	0.94	-	.	transcript_id "g61595.t1"; gene_id "g61595";
C2404047	AUGUSTUS	CDS	10	184	.	-	1	transcript_id "g61595.t1"; gene_id "g61595";
C2404083	AUGUSTUS	exon	1	135	0.94	-	.	transcript_id "g61596.t1"; gene_id "g61596";
C2404083	AUGUSTUS	CDS	1	114	.	-	0	transcript_id "g61596.t1"; gene_id "g61596";
C2404085	AUGUSTUS	exon	1	135	0.95	-	.	transcript_id "g61597.t1"; gene_id "g61597";
C2404085	AUGUSTUS	CDS	1	114	.	-	0	transcript_id "g61597.t1"; gene_id "g61597";
C2404367	AUGUSTUS	CDS	1	184	0.28	-	0	transcript_id "g61598.t1"; gene_id "g61598";
C2404873	AUGUSTUS	exon	17	125	0.65	-	.	transcript_id "g61599.t1"; gene_id "g61599";
C2404873	AUGUSTUS	CDS	17	94	.	-	0	transcript_id "g61599.t1"; gene_id "g61599";
C2405023	AUGUSTUS	CDS	7	162	0.42	-	0	transcript_id "g61600.t1"; gene_id "g61600";
C2405065	AUGUSTUS	CDS	17	184	0.99	+	0	transcript_id "g61601.t1"; gene_id "g61601";
C2405095	AUGUSTUS	CDS	1	184	0.56	+	1	transcript_id "g61602.t1"; gene_id "g61602";
C2405123	AUGUSTUS	CDS	17	184	0.56	+	2	transcript_id "g61603.t1"; gene_id "g61603";
C2405139	AUGUSTUS	CDS	17	184	0.89	+	0	transcript_id "g61604.t1"; gene_id "g61604";
C2405654	AUGUSTUS	CDS	6	185	0.91	+	0	transcript_id "g61605.t1"; gene_id "g61605";
C2405686	AUGUSTUS	exon	1	170	0.99	+	.	transcript_id "g61606.t1"; gene_id "g61606";
C2405686	AUGUSTUS	CDS	1	150	.	+	0	transcript_id "g61606.t1"; gene_id "g61606";
C2405782	AUGUSTUS	CDS	1	185	0.65	-	0	transcript_id "g61607.t1"; gene_id "g61607";
C2406050	AUGUSTUS	exon	1	185	0.99	-	.	transcript_id "g61608.t1"; gene_id "g61608";
C2406050	AUGUSTUS	CDS	69	185	.	-	0	transcript_id "g61608.t1"; gene_id "g61608";
C2406158	AUGUSTUS	CDS	15	185	0.53	+	0	transcript_id "g61609.t1"; gene_id "g61609";
C2406176	AUGUSTUS	exon	1	115	0.17	-	.	transcript_id "g61611.t1"; gene_id "g61611";
C2406176	AUGUSTUS	CDS	1	66	.	-	0	transcript_id "g61611.t1"; gene_id "g61611";
C2406268	AUGUSTUS	CDS	12	185	0.96	+	0	transcript_id "g61610.t1"; gene_id "g61610";
C2406400	AUGUSTUS	CDS	12	153	0.53	+	0	transcript_id "g61612.t1"; gene_id "g61612";
C2406428	AUGUSTUS	CDS	22	185	0.82	+	0	transcript_id "g61613.t1"; gene_id "g61613";
C2406554	AUGUSTUS	CDS	1	185	0.9	+	2	transcript_id "g61614.t1"; gene_id "g61614";
C2406590	AUGUSTUS	exon	1	185	0.93	-	.	transcript_id "g61616.t1"; gene_id "g61616";
C2406590	AUGUSTUS	CDS	22	185	.	-	2	transcript_id "g61616.t1"; gene_id "g61616";
C2406644	AUGUSTUS	CDS	1	185	0.28	+	2	transcript_id "g61615.t1"; gene_id "g61615";
C2407092	AUGUSTUS	CDS	1	185	0.61	-	2	transcript_id "g61617.t1"; gene_id "g61617";
C2407204	AUGUSTUS	exon	1	135	0.34	-	.	transcript_id "g61618.t1"; gene_id "g61618";
C2407204	AUGUSTUS	CDS	1	92	.	-	0	transcript_id "g61618.t1"; gene_id "g61618";
C2407290	AUGUSTUS	CDS	17	185	0.6	+	0	transcript_id "g61619.t1"; gene_id "g61619";
C2407540	AUGUSTUS	CDS	21	185	0.99	+	0	transcript_id "g61620.t1"; gene_id "g61620";
C2407554	AUGUSTUS	CDS	15	149	0.32	+	0	transcript_id "g61621.t1"; gene_id "g61621";
C2407576	AUGUSTUS	CDS	1	185	0.87	+	2	transcript_id "g61623.t1"; gene_id "g61623";
C2407602	AUGUSTUS	exon	1	154	0.36	+	.	transcript_id "g61622.t1"; gene_id "g61622";
C2407602	AUGUSTUS	CDS	1	131	.	+	2	transcript_id "g61622.t1"; gene_id "g61622";
C2407758	AUGUSTUS	exon	1	160	0.42	+	.	transcript_id "g61624.t1"; gene_id "g61624";
C2407758	AUGUSTUS	CDS	1	128	.	+	2	transcript_id "g61624.t1"; gene_id "g61624";
C2408266	AUGUSTUS	exon	1	181	0.66	+	.	transcript_id "g61625.t1"; gene_id "g61625";
C2408266	AUGUSTUS	CDS	1	157	.	+	1	transcript_id "g61625.t1"; gene_id "g61625";
C2408414	AUGUSTUS	CDS	1	185	0.95	-	0	transcript_id "g61626.t1"; gene_id "g61626";
C2408448	AUGUSTUS	exon	1	175	0.85	-	.	transcript_id "g61627.t1"; gene_id "g61627";
C2408448	AUGUSTUS	CDS	33	175	.	-	2	transcript_id "g61627.t1"; gene_id "g61627";
C2408546	AUGUSTUS	CDS	1	185	0.65	+	1	transcript_id "g61628.t1"; gene_id "g61628";
C2408620	AUGUSTUS	CDS	3	185	0.99	+	0	transcript_id "g61629.t1"; gene_id "g61629";
C2409220	AUGUSTUS	CDS	24	185	0.79	+	0	transcript_id "g61630.t1"; gene_id "g61630";
C2409264	AUGUSTUS	CDS	3	185	0.51	+	0	transcript_id "g61631.t1"; gene_id "g61631";
C2409616	AUGUSTUS	exon	44	137	0.42	+	.	transcript_id "g61633.t1"; gene_id "g61633";
C2409616	AUGUSTUS	CDS	44	100	.	+	0	transcript_id "g61633.t1"; gene_id "g61633";
C2409638	AUGUSTUS	CDS	1	163	0.88	-	0	transcript_id "g61632.t1"; gene_id "g61632";
C2409704	AUGUSTUS	CDS	1	185	0.49	-	1	transcript_id "g61634.t1"; gene_id "g61634";
C2409802	AUGUSTUS	exon	9	185	0.66	+	.	transcript_id "g61635.t1"; gene_id "g61635";
C2409802	AUGUSTUS	CDS	37	185	.	+	0	transcript_id "g61635.t1"; gene_id "g61635";
C2409832	AUGUSTUS	exon	1	180	0.44	+	.	transcript_id "g61636.t1"; gene_id "g61636";
C2409832	AUGUSTUS	CDS	1	135	.	+	0	transcript_id "g61636.t1"; gene_id "g61636";
C2409840	AUGUSTUS	CDS	1	185	0.93	+	0	transcript_id "g61637.t1"; gene_id "g61637";
C2410314	AUGUSTUS	CDS	1	186	0.93	+	0	transcript_id "g61638.t1"; gene_id "g61638";
C2410328	AUGUSTUS	exon	1	186	0.53	+	.	transcript_id "g61639.t1"; gene_id "g61639";
C2410328	AUGUSTUS	CDS	1	170	.	+	2	transcript_id "g61639.t1"; gene_id "g61639";
C2410588	AUGUSTUS	CDS	1	186	0.72	+	2	transcript_id "g61640.t1"; gene_id "g61640";
C2410930	AUGUSTUS	exon	1	186	0.79	-	.	transcript_id "g61641.t1"; gene_id "g61641";
C2410930	AUGUSTUS	CDS	16	186	.	-	0	transcript_id "g61641.t1"; gene_id "g61641";
C2410966	AUGUSTUS	CDS	1	186	0.45	+	0	transcript_id "g61642.t1"; gene_id "g61642";
C2410972	AUGUSTUS	CDS	9	186	0.59	+	0	transcript_id "g61643.t1"; gene_id "g61643";
C2410976	AUGUSTUS	CDS	1	186	0.27	+	0	transcript_id "g61644.t1"; gene_id "g61644";
C2410990	AUGUSTUS	exon	76	168	0.75	+	.	transcript_id "g61645.t1"; gene_id "g61645";
C2410990	AUGUSTUS	CDS	76	135	.	+	0	transcript_id "g61645.t1"; gene_id "g61645";
C2411140	AUGUSTUS	CDS	1	186	0.63	+	0	transcript_id "g61646.t1"; gene_id "g61646";
C2411296	AUGUSTUS	exon	1	186	0.97	-	.	transcript_id "g61647.t1"; gene_id "g61647";
C2411296	AUGUSTUS	CDS	18	186	.	-	1	transcript_id "g61647.t1"; gene_id "g61647";
C2411366	AUGUSTUS	exon	1	142	0.62	+	.	transcript_id "g61648.t1"; gene_id "g61648";
C2411366	AUGUSTUS	CDS	1	71	.	+	2	transcript_id "g61648.t1"; gene_id "g61648";
C2411546	AUGUSTUS	CDS	1	186	0.32	-	1	transcript_id "g61649.t1"; gene_id "g61649";
C2411704	AUGUSTUS	exon	51	125	0.4	-	.	transcript_id "g61650.t1"; gene_id "g61650";
C2411704	AUGUSTUS	CDS	51	55	.	-	0	transcript_id "g61650.t1"; gene_id "g61650";
C2411800	AUGUSTUS	CDS	12	186	0.56	+	0	transcript_id "g61651.t1"; gene_id "g61651";
C2411840	AUGUSTUS	exon	1	176	0.45	+	.	transcript_id "g61652.t1"; gene_id "g61652";
C2411840	AUGUSTUS	CDS	1	110	.	+	2	transcript_id "g61652.t1"; gene_id "g61652";
C2412026	AUGUSTUS	CDS	1	186	0.67	+	0	transcript_id "g61653.t1"; gene_id "g61653";
C2412040	AUGUSTUS	CDS	24	186	0.69	+	0	transcript_id "g61654.t1"; gene_id "g61654";
C2412092	AUGUSTUS	CDS	19	186	0.7	+	0	transcript_id "g61655.t1"; gene_id "g61655";
C2412100	AUGUSTUS	CDS	19	186	0.86	+	0	transcript_id "g61656.t1"; gene_id "g61656";
C2412236	AUGUSTUS	CDS	1	186	0.61	-	0	transcript_id "g61657.t1"; gene_id "g61657";
C2412312	AUGUSTUS	CDS	19	186	0.96	+	0	transcript_id "g61658.t1"; gene_id "g61658";
C2412428	AUGUSTUS	exon	1	186	0.83	-	.	transcript_id "g61659.t1"; gene_id "g61659";
C2412428	AUGUSTUS	CDS	17	186	.	-	2	transcript_id "g61659.t1"; gene_id "g61659";
C2412460	AUGUSTUS	exon	1	160	0.82	+	.	transcript_id "g61660.t1"; gene_id "g61660";
C2412460	AUGUSTUS	CDS	1	137	.	+	2	transcript_id "g61660.t1"; gene_id "g61660";
C2412462	AUGUSTUS	CDS	24	186	0.88	+	0	transcript_id "g61661.t1"; gene_id "g61661";
C2412580	AUGUSTUS	CDS	14	186	0.93	+	0	transcript_id "g61662.t1"; gene_id "g61662";
C2412676	AUGUSTUS	exon	1	186	0.92	-	.	transcript_id "g61663.t1"; gene_id "g61663";
C2412676	AUGUSTUS	CDS	6	186	.	-	1	transcript_id "g61663.t1"; gene_id "g61663";
C2412818	AUGUSTUS	CDS	2	186	0.92	+	0	transcript_id "g61664.t1"; gene_id "g61664";
C2412868	AUGUSTUS	CDS	1	186	0.91	-	0	transcript_id "g61665.t1"; gene_id "g61665";
C2413109	AUGUSTUS	CDS	1	186	0.34	+	2	transcript_id "g61666.t1"; gene_id "g61666";
C2413165	AUGUSTUS	CDS	17	186	0.63	+	0	transcript_id "g61667.t1"; gene_id "g61667";
C2413217	AUGUSTUS	CDS	22	186	1	+	0	transcript_id "g61668.t1"; gene_id "g61668";
C2413551	AUGUSTUS	CDS	1	186	0.5	+	1	transcript_id "g61669.t1"; gene_id "g61669";
C2413575	AUGUSTUS	exon	1	186	0.97	-	.	transcript_id "g61670.t1"; gene_id "g61670";
C2413575	AUGUSTUS	CDS	26	186	.	-	2	transcript_id "g61670.t1"; gene_id "g61670";
C2413663	AUGUSTUS	exon	1	135	0.98	-	.	transcript_id "g61671.t1"; gene_id "g61671";
C2413663	AUGUSTUS	CDS	1	102	.	-	0	transcript_id "g61671.t1"; gene_id "g61671";
C2413711	AUGUSTUS	CDS	1	186	0.97	+	0	transcript_id "g61672.t1"; gene_id "g61672";
C2413759	AUGUSTUS	CDS	9	186	0.92	+	0	transcript_id "g61673.t1"; gene_id "g61673";
C2413881	AUGUSTUS	CDS	21	186	0.51	-	0	transcript_id "g61674.t1"; gene_id "g61674";
C2414029	AUGUSTUS	CDS	2	186	0.87	+	0	transcript_id "g61675.t1"; gene_id "g61675";
C2414711	AUGUSTUS	exon	1	186	0.89	-	.	transcript_id "g61676.t1"; gene_id "g61676";
C2414711	AUGUSTUS	CDS	34	186	.	-	0	transcript_id "g61676.t1"; gene_id "g61676";
C2414747	AUGUSTUS	CDS	1	186	0.68	-	1	transcript_id "g61677.t1"; gene_id "g61677";
C2415294	AUGUSTUS	exon	1	187	0.87	-	.	transcript_id "g61678.t1"; gene_id "g61678";
C2415294	AUGUSTUS	CDS	65	187	.	-	0	transcript_id "g61678.t1"; gene_id "g61678";
C2415298	AUGUSTUS	exon	1	180	0.2	+	.	transcript_id "g61679.t1"; gene_id "g61679";
C2415298	AUGUSTUS	CDS	1	89	.	+	2	transcript_id "g61679.t1"; gene_id "g61679";
C2415350	AUGUSTUS	CDS	11	187	0.46	+	0	transcript_id "g61680.t1"; gene_id "g61680";
C2415374	AUGUSTUS	exon	1	187	0.58	+	.	transcript_id "g61681.t1"; gene_id "g61681";
C2415374	AUGUSTUS	CDS	1	181	.	+	1	transcript_id "g61681.t1"; gene_id "g61681";
C2415674	AUGUSTUS	exon	1	115	0.81	-	.	transcript_id "g61682.t1"; gene_id "g61682";
C2415674	AUGUSTUS	CDS	1	63	.	-	0	transcript_id "g61682.t1"; gene_id "g61682";
C2415742	AUGUSTUS	exon	1	187	0.71	-	.	transcript_id "g61683.t1"; gene_id "g61683";
C2415742	AUGUSTUS	CDS	38	187	.	-	0	transcript_id "g61683.t1"; gene_id "g61683";
C2415862	AUGUSTUS	CDS	10	187	1	+	0	transcript_id "g61684.t1"; gene_id "g61684";
C2415998	AUGUSTUS	CDS	13	187	0.78	+	0	transcript_id "g61685.t1"; gene_id "g61685";
C2416030	AUGUSTUS	exon	1	112	0.59	+	.	transcript_id "g61686.t1"; gene_id "g61686";
C2416030	AUGUSTUS	CDS	1	74	.	+	2	transcript_id "g61686.t1"; gene_id "g61686";
C2416056	AUGUSTUS	exon	41	135	0.64	-	.	transcript_id "g61691.t1"; gene_id "g61691";
C2416056	AUGUSTUS	CDS	41	89	.	-	0	transcript_id "g61691.t1"; gene_id "g61691";
C2416062	AUGUSTUS	CDS	1	187	0.27	+	1	transcript_id "g61687.t1"; gene_id "g61687";
C2416064	AUGUSTUS	CDS	1	187	0.69	+	1	transcript_id "g61690.t1"; gene_id "g61690";
C2416066	AUGUSTUS	CDS	53	187	0.58	+	0	transcript_id "g61689.t1"; gene_id "g61689";
C2416076	AUGUSTUS	CDS	7	187	0.79	-	1	transcript_id "g61688.t1"; gene_id "g61688";
C2416528	AUGUSTUS	CDS	12	187	0.94	+	0	transcript_id "g61692.t1"; gene_id "g61692";
C2416578	AUGUSTUS	CDS	22	187	0.99	+	0	transcript_id "g61693.t1"; gene_id "g61693";
C2416628	AUGUSTUS	CDS	1	187	0.5	+	2	transcript_id "g61694.t1"; gene_id "g61694";
C2416930	AUGUSTUS	CDS	1	187	0.46	-	0	transcript_id "g61695.t1"; gene_id "g61695";
C2417416	AUGUSTUS	CDS	1	187	0.63	+	1	transcript_id "g61696.t1"; gene_id "g61696";
C2417510	AUGUSTUS	CDS	8	187	0.94	+	0	transcript_id "g61697.t1"; gene_id "g61697";
C2417676	AUGUSTUS	CDS	1	187	0.43	-	1	transcript_id "g61698.t1"; gene_id "g61698";
C2417800	AUGUSTUS	CDS	7	187	0.97	-	0	transcript_id "g61699.t1"; gene_id "g61699";
C2417868	AUGUSTUS	CDS	24	187	0.73	+	0	transcript_id "g61700.t1"; gene_id "g61700";
C2418070	AUGUSTUS	exon	13	160	0.49	+	.	transcript_id "g61701.t1"; gene_id "g61701";
C2418070	AUGUSTUS	CDS	13	115	.	+	1	transcript_id "g61701.t1"; gene_id "g61701";
C2418294	AUGUSTUS	CDS	18	187	0.96	+	0	transcript_id "g61702.t1"; gene_id "g61702";
C2418374	AUGUSTUS	CDS	1	187	0.93	+	1	transcript_id "g61703.t1"; gene_id "g61703";
C2418512	AUGUSTUS	CDS	14	187	0.96	+	0	transcript_id "g61704.t1"; gene_id "g61704";
C2418802	AUGUSTUS	CDS	1	187	0.65	-	0	transcript_id "g61705.t1"; gene_id "g61705";
C2418888	AUGUSTUS	CDS	3	187	0.95	+	0	transcript_id "g61706.t1"; gene_id "g61706";
C2418980	AUGUSTUS	CDS	7	187	0.45	-	2	transcript_id "g61707.t1"; gene_id "g61707";
C2419324	AUGUSTUS	CDS	1	187	0.7	-	0	transcript_id "g61708.t1"; gene_id "g61708";
C2419400	AUGUSTUS	CDS	17	187	0.85	+	0	transcript_id "g61709.t1"; gene_id "g61709";
C2419528	AUGUSTUS	CDS	17	187	0.95	+	0	transcript_id "g61710.t1"; gene_id "g61710";
C2419948	AUGUSTUS	CDS	6	188	0.77	+	0	transcript_id "g61711.t1"; gene_id "g61711";
C2420176	AUGUSTUS	exon	1	188	0.96	-	.	transcript_id "g61712.t1"; gene_id "g61712";
C2420176	AUGUSTUS	CDS	42	188	.	-	0	transcript_id "g61712.t1"; gene_id "g61712";
C2420306	AUGUSTUS	exon	32	178	0.83	+	.	transcript_id "g61713.t1"; gene_id "g61713";
C2420306	AUGUSTUS	CDS	32	152	.	+	1	transcript_id "g61713.t1"; gene_id "g61713";
C2420446	AUGUSTUS	CDS	1	188	0.95	+	2	transcript_id "g61714.t1"; gene_id "g61714";
C2420484	AUGUSTUS	exon	1	178	0.96	-	.	transcript_id "g61715.t1"; gene_id "g61715";
C2420484	AUGUSTUS	CDS	38	178	.	-	0	transcript_id "g61715.t1"; gene_id "g61715";
C2420558	AUGUSTUS	CDS	18	188	0.7	+	0	transcript_id "g61716.t1"; gene_id "g61716";
C2420568	AUGUSTUS	exon	7	135	0.52	-	.	transcript_id "g61717.t1"; gene_id "g61717";
C2420568	AUGUSTUS	CDS	7	83	.	-	0	transcript_id "g61717.t1"; gene_id "g61717";
C2420632	AUGUSTUS	CDS	1	188	0.58	-	1	transcript_id "g61718.t1"; gene_id "g61718";
C2420780	AUGUSTUS	exon	47	179	0.83	+	.	transcript_id "g61721.t1"; gene_id "g61721";
C2420780	AUGUSTUS	CDS	47	146	.	+	1	transcript_id "g61721.t1"; gene_id "g61721";
C2420806	AUGUSTUS	CDS	15	188	0.45	+	0	transcript_id "g61719.t1"; gene_id "g61719";
C2420818	AUGUSTUS	exon	1	188	0.94	-	.	transcript_id "g61720.t1"; gene_id "g61720";
C2420818	AUGUSTUS	CDS	6	188	.	-	0	transcript_id "g61720.t1"; gene_id "g61720";
C2420940	AUGUSTUS	exon	1	188	0.96	-	.	transcript_id "g61722.t1"; gene_id "g61722";
C2420940	AUGUSTUS	CDS	26	188	.	-	1	transcript_id "g61722.t1"; gene_id "g61722";
C2420958	AUGUSTUS	exon	1	135	0.48	-	.	transcript_id "g61723.t1"; gene_id "g61723";
C2420958	AUGUSTUS	CDS	1	101	.	-	0	transcript_id "g61723.t1"; gene_id "g61723";
C2420984	AUGUSTUS	CDS	1	188	0.98	+	2	transcript_id "g61724.t1"; gene_id "g61724";
C2421034	AUGUSTUS	CDS	1	188	0.49	-	0	transcript_id "g61725.t1"; gene_id "g61725";
C2421060	AUGUSTUS	CDS	1	188	0.93	+	0	transcript_id "g61726.t1"; gene_id "g61726";
C2421178	AUGUSTUS	CDS	1	188	0.16	+	2	transcript_id "g61727.t1"; gene_id "g61727";
C2421240	AUGUSTUS	exon	1	115	0.21	-	.	transcript_id "g61729.t1"; gene_id "g61729";
C2421240	AUGUSTUS	CDS	1	83	.	-	0	transcript_id "g61729.t1"; gene_id "g61729";
C2421254	AUGUSTUS	exon	1	170	0.67	+	.	transcript_id "g61728.t1"; gene_id "g61728";
C2421254	AUGUSTUS	CDS	1	146	.	+	2	transcript_id "g61728.t1"; gene_id "g61728";
C2421482	AUGUSTUS	CDS	1	188	0.55	+	0	transcript_id "g61730.t1"; gene_id "g61730";
C2421488	AUGUSTUS	CDS	1	188	0.48	+	0	transcript_id "g61731.t1"; gene_id "g61731";
C2421528	AUGUSTUS	exon	15	150	0.91	+	.	transcript_id "g61732.t1"; gene_id "g61732";
C2421528	AUGUSTUS	CDS	15	118	.	+	2	transcript_id "g61732.t1"; gene_id "g61732";
C2421702	AUGUSTUS	CDS	1	188	0.98	+	1	transcript_id "g61733.t1"; gene_id "g61733";
C2421752	AUGUSTUS	CDS	1	188	0.46	+	2	transcript_id "g61734.t1"; gene_id "g61734";
C2421798	AUGUSTUS	exon	4	188	0.85	+	.	transcript_id "g61735.t1"; gene_id "g61735";
C2421798	AUGUSTUS	CDS	32	188	.	+	0	transcript_id "g61735.t1"; gene_id "g61735";
C2421816	AUGUSTUS	CDS	1	188	0.87	-	0	transcript_id "g61736.t1"; gene_id "g61736";
C2421850	AUGUSTUS	exon	50	105	0.52	-	.	transcript_id "g61738.t1"; gene_id "g61738";
C2421850	AUGUSTUS	CDS	50	79	.	-	0	transcript_id "g61738.t1"; gene_id "g61738";
C2421862	AUGUSTUS	CDS	6	188	0.87	+	0	transcript_id "g61737.t1"; gene_id "g61737";
C2421876	AUGUSTUS	CDS	15	157	0.77	+	0	transcript_id "g61739.t1"; gene_id "g61739";
C2421902	AUGUSTUS	CDS	11	133	0.31	+	0	transcript_id "g61740.t1"; gene_id "g61740";
C2421904	AUGUSTUS	CDS	11	133	0.31	+	0	transcript_id "g61741.t1"; gene_id "g61741";
C2422262	AUGUSTUS	exon	47	178	0.49	+	.	transcript_id "g61742.t1"; gene_id "g61742";
C2422262	AUGUSTUS	CDS	47	138	.	+	2	transcript_id "g61742.t1"; gene_id "g61742";
C2422270	AUGUSTUS	exon	43	115	0.37	-	.	transcript_id "g61745.t1"; gene_id "g61745";
C2422270	AUGUSTUS	CDS	43	86	.	-	0	transcript_id "g61745.t1"; gene_id "g61745";
C2422286	AUGUSTUS	exon	1	182	0.4	+	.	transcript_id "g61743.t1"; gene_id "g61743";
C2422286	AUGUSTUS	CDS	1	139	.	+	1	transcript_id "g61743.t1"; gene_id "g61743";
C2422442	AUGUSTUS	CDS	9	188	0.53	+	0	transcript_id "g61744.t1"; gene_id "g61744";
C2422508	AUGUSTUS	CDS	1	188	0.73	+	1	transcript_id "g61746.t1"; gene_id "g61746";
C2422542	AUGUSTUS	CDS	21	188	0.74	+	0	transcript_id "g61747.t1"; gene_id "g61747";
C2422548	AUGUSTUS	CDS	6	188	1	+	0	transcript_id "g61748.t1"; gene_id "g61748";
C2422634	AUGUSTUS	CDS	1	188	0.41	-	0	transcript_id "g61749.t1"; gene_id "g61749";
C2422668	AUGUSTUS	CDS	20	188	0.34	-	2	transcript_id "g61750.t1"; gene_id "g61750";
C2422764	AUGUSTUS	CDS	4	188	0.86	+	0	transcript_id "g61751.t1"; gene_id "g61751";
C2422862	AUGUSTUS	CDS	1	188	0.73	+	2	transcript_id "g61752.t1"; gene_id "g61752";
C2422880	AUGUSTUS	CDS	23	188	0.92	+	0	transcript_id "g61753.t1"; gene_id "g61753";
C2422910	AUGUSTUS	CDS	19	188	0.94	+	0	transcript_id "g61754.t1"; gene_id "g61754";
C2422938	AUGUSTUS	CDS	6	188	1	+	0	transcript_id "g61755.t1"; gene_id "g61755";
C2422972	AUGUSTUS	exon	1	178	0.98	-	.	transcript_id "g61756.t1"; gene_id "g61756";
C2422972	AUGUSTUS	CDS	17	178	.	-	0	transcript_id "g61756.t1"; gene_id "g61756";
C2423022	AUGUSTUS	CDS	1	188	0.79	-	2	transcript_id "g61757.t1"; gene_id "g61757";
C2423224	AUGUSTUS	exon	1	135	0.45	-	.	transcript_id "g61758.t1"; gene_id "g61758";
C2423224	AUGUSTUS	CDS	1	67	.	-	0	transcript_id "g61758.t1"; gene_id "g61758";
C2423354	AUGUSTUS	exon	40	183	0.8	+	.	transcript_id "g61759.t1"; gene_id "g61759";
C2423354	AUGUSTUS	CDS	79	183	.	+	0	transcript_id "g61759.t1"; gene_id "g61759";
C2423362	AUGUSTUS	CDS	1	188	0.4	-	2	transcript_id "g61760.t1"; gene_id "g61760";
C2423610	AUGUSTUS	CDS	16	188	0.45	+	2	transcript_id "g61761.t1"; gene_id "g61761";
C2423878	AUGUSTUS	CDS	15	188	0.73	+	0	transcript_id "g61762.t1"; gene_id "g61762";
C2423894	AUGUSTUS	CDS	1	188	0.64	-	1	transcript_id "g61763.t1"; gene_id "g61763";
C2424152	AUGUSTUS	exon	1	125	0.87	-	.	transcript_id "g61764.t1"; gene_id "g61764";
C2424152	AUGUSTUS	CDS	1	102	.	-	0	transcript_id "g61764.t1"; gene_id "g61764";
C2424454	AUGUSTUS	exon	1	189	0.99	-	.	transcript_id "g61765.t1"; gene_id "g61765";
C2424454	AUGUSTUS	CDS	36	189	.	-	1	transcript_id "g61765.t1"; gene_id "g61765";
C2424608	AUGUSTUS	exon	1	189	0.96	-	.	transcript_id "g61766.t1"; gene_id "g61766";
C2424608	AUGUSTUS	CDS	3	189	.	-	1	transcript_id "g61766.t1"; gene_id "g61766";
C2424680	AUGUSTUS	exon	22	183	0.68	+	.	transcript_id "g61767.t1"; gene_id "g61767";
C2424680	AUGUSTUS	CDS	22	156	.	+	0	transcript_id "g61767.t1"; gene_id "g61767";
C2425130	AUGUSTUS	CDS	12	189	0.88	+	0	transcript_id "g61768.t1"; gene_id "g61768";
C2425144	AUGUSTUS	exon	1	170	0.48	+	.	transcript_id "g61769.t1"; gene_id "g61769";
C2425144	AUGUSTUS	CDS	1	128	.	+	2	transcript_id "g61769.t1"; gene_id "g61769";
C2425226	AUGUSTUS	exon	1	180	0.36	+	.	transcript_id "g61770.t1"; gene_id "g61770";
C2425226	AUGUSTUS	CDS	1	120	.	+	0	transcript_id "g61770.t1"; gene_id "g61770";
C2425228	AUGUSTUS	CDS	9	189	0.79	+	0	transcript_id "g61771.t1"; gene_id "g61771";
C2425314	AUGUSTUS	CDS	7	189	0.31	+	0	transcript_id "g61772.t1"; gene_id "g61772";
C2425332	AUGUSTUS	CDS	17	189	0.88	-	1	transcript_id "g61773.t1"; gene_id "g61773";
C2425510	AUGUSTUS	CDS	1	189	0.98	-	0	transcript_id "g61774.t1"; gene_id "g61774";
C2425534	AUGUSTUS	exon	1	189	0.7	-	.	transcript_id "g61775.t1"; gene_id "g61775";
C2425534	AUGUSTUS	CDS	31	189	.	-	0	transcript_id "g61775.t1"; gene_id "g61775";
C2425588	AUGUSTUS	CDS	23	189	0.22	+	0	transcript_id "g61776.t1"; gene_id "g61776";
C2425610	AUGUSTUS	CDS	1	184	0.1	+	2	transcript_id "g61777.t1"; gene_id "g61777";
C2425828	AUGUSTUS	exon	1	105	0.66	-	.	transcript_id "g61778.t1"; gene_id "g61778";
C2425828	AUGUSTUS	CDS	1	78	.	-	0	transcript_id "g61778.t1"; gene_id "g61778";
C2425870	AUGUSTUS	CDS	1	189	0.96	+	0	transcript_id "g61779.t1"; gene_id "g61779";
C2425932	AUGUSTUS	exon	1	151	0.69	+	.	transcript_id "g61781.t1"; gene_id "g61781";
C2425932	AUGUSTUS	CDS	1	128	.	+	2	transcript_id "g61781.t1"; gene_id "g61781";
C2425944	AUGUSTUS	CDS	1	189	0.74	+	0	transcript_id "g61780.t1"; gene_id "g61780";
C2425962	AUGUSTUS	exon	1	125	0.43	-	.	transcript_id "g61782.t1"; gene_id "g61782";
C2425962	AUGUSTUS	CDS	1	99	.	-	0	transcript_id "g61782.t1"; gene_id "g61782";
C2426102	AUGUSTUS	CDS	1	189	0.86	+	1	transcript_id "g61783.t1"; gene_id "g61783";
C2426280	AUGUSTUS	CDS	15	189	1	+	0	transcript_id "g61784.t1"; gene_id "g61784";
C2426576	AUGUSTUS	exon	1	176	0.25	+	.	transcript_id "g61785.t1"; gene_id "g61785";
C2426576	AUGUSTUS	CDS	1	118	.	+	1	transcript_id "g61785.t1"; gene_id "g61785";
C2426628	AUGUSTUS	exon	1	189	0.56	-	.	transcript_id "g61786.t1"; gene_id "g61786";
C2426628	AUGUSTUS	CDS	61	189	.	-	0	transcript_id "g61786.t1"; gene_id "g61786";
C2426880	AUGUSTUS	CDS	7	189	0.81	-	0	transcript_id "g61787.t1"; gene_id "g61787";
C2426936	AUGUSTUS	exon	1	180	0.32	+	.	transcript_id "g61788.t1"; gene_id "g61788";
C2426936	AUGUSTUS	CDS	1	125	.	+	2	transcript_id "g61788.t1"; gene_id "g61788";
C2426960	AUGUSTUS	CDS	23	189	0.59	+	0	transcript_id "g61789.t1"; gene_id "g61789";
C2427148	AUGUSTUS	CDS	4	189	0.53	+	0	transcript_id "g61790.t1"; gene_id "g61790";
C2427232	AUGUSTUS	exon	1	189	0.84	-	.	transcript_id "g61791.t1"; gene_id "g61791";
C2427232	AUGUSTUS	CDS	22	189	.	-	0	transcript_id "g61791.t1"; gene_id "g61791";
C2427234	AUGUSTUS	exon	1	189	1	+	.	transcript_id "g61792.t1"; gene_id "g61792";
C2427234	AUGUSTUS	CDS	1	179	.	+	2	transcript_id "g61792.t1"; gene_id "g61792";
C2427400	AUGUSTUS	exon	1	135	0.56	-	.	transcript_id "g61793.t1"; gene_id "g61793";
C2427400	AUGUSTUS	CDS	1	91	.	-	0	transcript_id "g61793.t1"; gene_id "g61793";
C2427558	AUGUSTUS	exon	1	182	0.65	+	.	transcript_id "g61794.t1"; gene_id "g61794";
C2427558	AUGUSTUS	CDS	1	98	.	+	2	transcript_id "g61794.t1"; gene_id "g61794";
C2427644	AUGUSTUS	CDS	31	189	0.35	-	2	transcript_id "g61795.t1"; gene_id "g61795";
C2427780	AUGUSTUS	exon	1	189	0.95	-	.	transcript_id "g61796.t1"; gene_id "g61796";
C2427780	AUGUSTUS	CDS	13	189	.	-	0	transcript_id "g61796.t1"; gene_id "g61796";
C2428082	AUGUSTUS	CDS	1	189	0.83	-	0	transcript_id "g61797.t1"; gene_id "g61797";
C2428152	AUGUSTUS	CDS	1	189	0.65	+	1	transcript_id "g61798.t1"; gene_id "g61798";
C2428154	AUGUSTUS	CDS	1	189	0.8	+	1	transcript_id "g61799.t1"; gene_id "g61799";
C2428306	AUGUSTUS	CDS	15	179	0.65	-	0	transcript_id "g61800.t1"; gene_id "g61800";
C2428316	AUGUSTUS	CDS	8	189	0.95	+	0	transcript_id "g61801.t1"; gene_id "g61801";
C2428350	AUGUSTUS	exon	1	135	0.26	-	.	transcript_id "g61802.t1"; gene_id "g61802";
C2428350	AUGUSTUS	CDS	1	96	.	-	0	transcript_id "g61802.t1"; gene_id "g61802";
C2428384	AUGUSTUS	CDS	10	189	0.77	+	0	transcript_id "g61805.t1"; gene_id "g61805";
C2428390	AUGUSTUS	exon	1	180	0.37	+	.	transcript_id "g61803.t1"; gene_id "g61803";
C2428390	AUGUSTUS	CDS	1	158	.	+	2	transcript_id "g61803.t1"; gene_id "g61803";
C2428400	AUGUSTUS	CDS	1	189	0.64	+	0	transcript_id "g61804.t1"; gene_id "g61804";
C2429364	AUGUSTUS	CDS	1	190	0.68	+	2	transcript_id "g61806.t1"; gene_id "g61806";
C2429394	AUGUSTUS	CDS	7	190	1	-	1	transcript_id "g61807.t1"; gene_id "g61807";
C2429760	AUGUSTUS	exon	1	170	0.27	+	.	transcript_id "g61808.t1"; gene_id "g61808";
C2429760	AUGUSTUS	CDS	1	134	.	+	2	transcript_id "g61808.t1"; gene_id "g61808";
C2429818	AUGUSTUS	exon	1	190	0.78	-	.	transcript_id "g61814.t1"; gene_id "g61814";
C2429818	AUGUSTUS	CDS	29	190	.	-	0	transcript_id "g61814.t1"; gene_id "g61814";
C2429972	AUGUSTUS	CDS	3	190	0.99	+	0	transcript_id "g61809.t1"; gene_id "g61809";
C2430084	AUGUSTUS	exon	1	146	0.6	-	.	transcript_id "g61810.t1"; gene_id "g61810";
C2430084	AUGUSTUS	CDS	1	122	.	-	0	transcript_id "g61810.t1"; gene_id "g61810";
C2430104	AUGUSTUS	exon	1	173	0.78	+	.	transcript_id "g61811.t1"; gene_id "g61811";
C2430104	AUGUSTUS	CDS	1	151	.	+	1	transcript_id "g61811.t1"; gene_id "g61811";
C2430106	AUGUSTUS	exon	1	180	0.52	+	.	transcript_id "g61812.t1"; gene_id "g61812";
C2430106	AUGUSTUS	CDS	1	149	.	+	2	transcript_id "g61812.t1"; gene_id "g61812";
C2430130	AUGUSTUS	CDS	7	190	0.69	+	0	transcript_id "g61813.t1"; gene_id "g61813";
C2430382	AUGUSTUS	exon	1	180	0.84	-	.	transcript_id "g61815.t1"; gene_id "g61815";
C2430382	AUGUSTUS	CDS	18	180	.	-	1	transcript_id "g61815.t1"; gene_id "g61815";
C2430412	AUGUSTUS	CDS	1	190	0.98	+	0	transcript_id "g61816.t1"; gene_id "g61816";
C2430484	AUGUSTUS	CDS	1	190	0.35	-	1	transcript_id "g61817.t1"; gene_id "g61817";
C2430544	AUGUSTUS	CDS	6	190	0.32	+	0	transcript_id "g61818.t1"; gene_id "g61818";
C2430606	AUGUSTUS	CDS	1	190	0.53	+	1	transcript_id "g61819.t1"; gene_id "g61819";
C2430794	AUGUSTUS	exon	1	190	0.7	-	.	transcript_id "g61820.t1"; gene_id "g61820";
C2430794	AUGUSTUS	CDS	25	190	.	-	1	transcript_id "g61820.t1"; gene_id "g61820";
C2430946	AUGUSTUS	CDS	17	190	0.89	+	0	transcript_id "g61821.t1"; gene_id "g61821";
C2431122	AUGUSTUS	CDS	2	190	0.94	+	0	transcript_id "g61822.t1"; gene_id "g61822";
C2431428	AUGUSTUS	CDS	20	190	0.97	+	0	transcript_id "g61823.t1"; gene_id "g61823";
C2431590	AUGUSTUS	exon	49	180	0.59	+	.	transcript_id "g61824.t1"; gene_id "g61824";
C2431590	AUGUSTUS	CDS	49	153	.	+	0	transcript_id "g61824.t1"; gene_id "g61824";
C2431612	AUGUSTUS	exon	1	180	0.73	+	.	transcript_id "g61825.t1"; gene_id "g61825";
C2431612	AUGUSTUS	CDS	1	133	.	+	1	transcript_id "g61825.t1"; gene_id "g61825";
C2431702	AUGUSTUS	CDS	20	190	0.99	+	0	transcript_id "g61826.t1"; gene_id "g61826";
C2431774	AUGUSTUS	exon	1	190	0.99	-	.	transcript_id "g61827.t1"; gene_id "g61827";
C2431774	AUGUSTUS	CDS	24	190	.	-	2	transcript_id "g61827.t1"; gene_id "g61827";
C2431792	AUGUSTUS	CDS	1	190	0.36	+	1	transcript_id "g61828.t1"; gene_id "g61828";
C2431858	AUGUSTUS	CDS	1	190	0.35	-	1	transcript_id "g61829.t1"; gene_id "g61829";
C2431860	AUGUSTUS	CDS	1	190	0.35	-	1	transcript_id "g61830.t1"; gene_id "g61830";
C2431892	AUGUSTUS	CDS	1	190	0.12	+	2	transcript_id "g61831.t1"; gene_id "g61831";
C2431950	AUGUSTUS	exon	1	125	0.45	-	.	transcript_id "g61832.t1"; gene_id "g61832";
C2431950	AUGUSTUS	CDS	1	91	.	-	0	transcript_id "g61832.t1"; gene_id "g61832";
C2432032	AUGUSTUS	CDS	1	190	0.47	-	2	transcript_id "g61833.t1"; gene_id "g61833";
C2432662	AUGUSTUS	CDS	1	190	0.47	-	0	transcript_id "g61834.t1"; gene_id "g61834";
C2432962	AUGUSTUS	CDS	1	190	0.28	-	1	transcript_id "g61835.t1"; gene_id "g61835";
C2433322	AUGUSTUS	CDS	24	191	0.94	+	0	transcript_id "g61836.t1"; gene_id "g61836";
C2433464	AUGUSTUS	exon	1	191	0.98	-	.	transcript_id "g61837.t1"; gene_id "g61837";
C2433464	AUGUSTUS	CDS	64	191	.	-	2	transcript_id "g61837.t1"; gene_id "g61837";
C2433734	AUGUSTUS	exon	1	191	0.59	-	.	transcript_id "g61838.t1"; gene_id "g61838";
C2433734	AUGUSTUS	CDS	59	191	.	-	1	transcript_id "g61838.t1"; gene_id "g61838";
C2433874	AUGUSTUS	CDS	14	191	0.93	+	0	transcript_id "g61839.t1"; gene_id "g61839";
C2433892	AUGUSTUS	exon	1	173	0.59	+	.	transcript_id "g61841.t1"; gene_id "g61841";
C2433892	AUGUSTUS	CDS	1	126	.	+	0	transcript_id "g61841.t1"; gene_id "g61841";
C2433894	AUGUSTUS	exon	1	173	0.78	+	.	transcript_id "g61840.t1"; gene_id "g61840";
C2433894	AUGUSTUS	CDS	1	126	.	+	0	transcript_id "g61840.t1"; gene_id "g61840";
C2434118	AUGUSTUS	exon	1	191	0.98	-	.	transcript_id "g61842.t1"; gene_id "g61842";
C2434118	AUGUSTUS	CDS	35	191	.	-	1	transcript_id "g61842.t1"; gene_id "g61842";
C2434232	AUGUSTUS	exon	27	191	0.97	+	.	transcript_id "g61843.t1"; gene_id "g61843";
C2434232	AUGUSTUS	CDS	54	191	.	+	0	transcript_id "g61843.t1"; gene_id "g61843";
C2434246	AUGUSTUS	CDS	1	191	0.87	+	2	transcript_id "g61844.t1"; gene_id "g61844";
C2434276	AUGUSTUS	CDS	1	191	0.52	-	2	transcript_id "g61845.t1"; gene_id "g61845";
C2434304	AUGUSTUS	exon	2	191	0.63	+	.	transcript_id "g61846.t1"; gene_id "g61846";
C2434304	AUGUSTUS	CDS	30	191	.	+	0	transcript_id "g61846.t1"; gene_id "g61846";
C2434514	AUGUSTUS	exon	1	133	0.38	+	.	transcript_id "g61847.t1"; gene_id "g61847";
C2434514	AUGUSTUS	CDS	1	102	.	+	0	transcript_id "g61847.t1"; gene_id "g61847";
C2434544	AUGUSTUS	exon	23	170	0.75	+	.	transcript_id "g61850.t1"; gene_id "g61850";
C2434544	AUGUSTUS	CDS	23	117	.	+	2	transcript_id "g61850.t1"; gene_id "g61850";
C2434598	AUGUSTUS	exon	1	190	0.89	+	.	transcript_id "g61848.t1"; gene_id "g61848";
C2434598	AUGUSTUS	CDS	1	155	.	+	2	transcript_id "g61848.t1"; gene_id "g61848";
C2434618	AUGUSTUS	CDS	24	191	0.73	+	0	transcript_id "g61849.t1"; gene_id "g61849";
C2434702	AUGUSTUS	exon	47	135	0.52	-	.	transcript_id "g61851.t1"; gene_id "g61851";
C2434702	AUGUSTUS	CDS	47	73	.	-	0	transcript_id "g61851.t1"; gene_id "g61851";
C2434744	AUGUSTUS	CDS	1	191	1	+	0	transcript_id "g61852.t1"; gene_id "g61852";
C2434784	AUGUSTUS	CDS	1	191	0.22	+	0	transcript_id "g61853.t1"; gene_id "g61853";
C2434972	AUGUSTUS	CDS	1	191	0.3	-	1	transcript_id "g61854.t1"; gene_id "g61854";
C2435374	AUGUSTUS	CDS	11	191	0.92	-	1	transcript_id "g61855.t1"; gene_id "g61855";
C2435478	AUGUSTUS	CDS	1	191	0.75	+	0	transcript_id "g61856.t1"; gene_id "g61856";
C2435690	AUGUSTUS	CDS	1	191	0.84	-	1	transcript_id "g61857.t1"; gene_id "g61857";
C2435806	AUGUSTUS	exon	1	191	0.99	-	.	transcript_id "g61858.t1"; gene_id "g61858";
C2435806	AUGUSTUS	CDS	11	191	.	-	1	transcript_id "g61858.t1"; gene_id "g61858";
C2435868	AUGUSTUS	CDS	23	191	0.95	+	0	transcript_id "g61859.t1"; gene_id "g61859";
C2435886	AUGUSTUS	CDS	1	191	0.97	-	1	transcript_id "g61860.t1"; gene_id "g61860";
C2436500	AUGUSTUS	exon	1	125	0.52	-	.	transcript_id "g61861.t1"; gene_id "g61861";
C2436500	AUGUSTUS	CDS	1	73	.	-	0	transcript_id "g61861.t1"; gene_id "g61861";
C2437090	AUGUSTUS	CDS	16	191	0.67	+	0	transcript_id "g61862.t1"; gene_id "g61862";
C2437148	AUGUSTUS	CDS	7	191	0.42	-	0	transcript_id "g61863.t1"; gene_id "g61863";
C2437460	AUGUSTUS	exon	1	192	0.98	-	.	transcript_id "g61864.t1"; gene_id "g61864";
C2437460	AUGUSTUS	CDS	75	192	.	-	1	transcript_id "g61864.t1"; gene_id "g61864";
C2437674	AUGUSTUS	exon	7	85	0.51	-	.	transcript_id "g61865.t1"; gene_id "g61865";
C2437674	AUGUSTUS	CDS	7	55	.	-	0	transcript_id "g61865.t1"; gene_id "g61865";
C2437758	AUGUSTUS	exon	1	135	0.54	-	.	transcript_id "g61866.t1"; gene_id "g61866";
C2437758	AUGUSTUS	CDS	1	63	.	-	0	transcript_id "g61866.t1"; gene_id "g61866";
C2438058	AUGUSTUS	exon	1	192	0.84	-	.	transcript_id "g61867.t1"; gene_id "g61867";
C2438058	AUGUSTUS	CDS	60	192	.	-	1	transcript_id "g61867.t1"; gene_id "g61867";
C2438132	AUGUSTUS	CDS	14	192	0.39	+	0	transcript_id "g61868.t1"; gene_id "g61868";
C2438308	AUGUSTUS	CDS	1	192	0.57	-	2	transcript_id "g61869.t1"; gene_id "g61869";
C2438508	AUGUSTUS	CDS	12	192	0.88	+	0	transcript_id "g61870.t1"; gene_id "g61870";
C2438510	AUGUSTUS	CDS	1	192	0.48	-	1	transcript_id "g61871.t1"; gene_id "g61871";
C2438604	AUGUSTUS	CDS	1	192	0.95	+	2	transcript_id "g61872.t1"; gene_id "g61872";
C2438684	AUGUSTUS	CDS	1	192	0.98	+	2	transcript_id "g61873.t1"; gene_id "g61873";
C2439110	AUGUSTUS	CDS	1	192	0.85	+	0	transcript_id "g61874.t1"; gene_id "g61874";
C2439140	AUGUSTUS	CDS	1	192	0.99	+	0	transcript_id "g61875.t1"; gene_id "g61875";
C2439238	AUGUSTUS	CDS	1	192	0.43	-	0	transcript_id "g61876.t1"; gene_id "g61876";
C2439280	AUGUSTUS	CDS	11	192	0.27	-	1	transcript_id "g61877.t1"; gene_id "g61877";
C2439302	AUGUSTUS	CDS	22	192	1	+	0	transcript_id "g61878.t1"; gene_id "g61878";
C2439304	AUGUSTUS	CDS	22	192	0.99	+	0	transcript_id "g61879.t1"; gene_id "g61879";
C2439372	AUGUSTUS	exon	1	190	0.77	+	.	transcript_id "g61880.t1"; gene_id "g61880";
C2439372	AUGUSTUS	CDS	1	170	.	+	2	transcript_id "g61880.t1"; gene_id "g61880";
C2439440	AUGUSTUS	exon	12	125	0.29	-	.	transcript_id "g61881.t1"; gene_id "g61881";
C2439440	AUGUSTUS	CDS	12	94	.	-	0	transcript_id "g61881.t1"; gene_id "g61881";
C2439442	AUGUSTUS	CDS	1	192	0.39	-	1	transcript_id "g61882.t1"; gene_id "g61882";
C2439448	AUGUSTUS	CDS	1	192	0.43	-	2	transcript_id "g61883.t1"; gene_id "g61883";
C2439466	AUGUSTUS	exon	40	192	0.98	+	.	transcript_id "g61884.t1"; gene_id "g61884";
C2439466	AUGUSTUS	CDS	69	192	.	+	0	transcript_id "g61884.t1"; gene_id "g61884";
C2439468	AUGUSTUS	exon	1	192	1	+	.	transcript_id "g61885.t1"; gene_id "g61885";
C2439468	AUGUSTUS	CDS	1	191	.	+	2	transcript_id "g61885.t1"; gene_id "g61885";
C2439522	AUGUSTUS	CDS	1	187	0.43	+	1	transcript_id "g61886.t1"; gene_id "g61886";
C2439604	AUGUSTUS	CDS	1	192	0.41	+	0	transcript_id "g61887.t1"; gene_id "g61887";
C2439654	AUGUSTUS	exon	1	192	0.93	-	.	transcript_id "g61888.t1"; gene_id "g61888";
C2439654	AUGUSTUS	CDS	25	192	.	-	0	transcript_id "g61888.t1"; gene_id "g61888";
C2439796	AUGUSTUS	CDS	1	192	0.95	-	0	transcript_id "g61889.t1"; gene_id "g61889";
C2440038	AUGUSTUS	CDS	18	192	0.91	+	0	transcript_id "g61890.t1"; gene_id "g61890";
C2440336	AUGUSTUS	exon	1	192	0.81	-	.	transcript_id "g61891.t1"; gene_id "g61891";
C2440336	AUGUSTUS	CDS	4	192	.	-	0	transcript_id "g61891.t1"; gene_id "g61891";
C2440418	AUGUSTUS	CDS	17	192	0.94	+	0	transcript_id "g61892.t1"; gene_id "g61892";
C2440490	AUGUSTUS	exon	2	192	0.77	+	.	transcript_id "g61893.t1"; gene_id "g61893";
C2440490	AUGUSTUS	CDS	30	192	.	+	0	transcript_id "g61893.t1"; gene_id "g61893";
C2440606	AUGUSTUS	CDS	5	192	0.82	+	0	transcript_id "g61894.t1"; gene_id "g61894";
C2440724	AUGUSTUS	exon	1	135	0.19	-	.	transcript_id "g61895.t1"; gene_id "g61895";
C2440724	AUGUSTUS	CDS	1	99	.	-	0	transcript_id "g61895.t1"; gene_id "g61895";
C2440770	AUGUSTUS	CDS	9	192	1	+	0	transcript_id "g61896.t1"; gene_id "g61896";
C2441078	AUGUSTUS	CDS	1	192	0.51	+	2	transcript_id "g61897.t1"; gene_id "g61897";
C2441094	AUGUSTUS	CDS	22	192	0.41	-	1	transcript_id "g61898.t1"; gene_id "g61898";
C2441366	AUGUSTUS	exon	1	182	0.57	+	.	transcript_id "g61899.t1"; gene_id "g61899";
C2441366	AUGUSTUS	CDS	1	160	.	+	1	transcript_id "g61899.t1"; gene_id "g61899";
C2441370	AUGUSTUS	exon	34	192	0.8	+	.	transcript_id "g61900.t1"; gene_id "g61900";
C2441370	AUGUSTUS	CDS	61	192	.	+	0	transcript_id "g61900.t1"; gene_id "g61900";
C2441388	AUGUSTUS	CDS	1	192	1	-	0	transcript_id "g61901.t1"; gene_id "g61901";
C2441836	AUGUSTUS	exon	1	193	0.93	-	.	transcript_id "g61902.t1"; gene_id "g61902";
C2441836	AUGUSTUS	CDS	25	193	.	-	1	transcript_id "g61902.t1"; gene_id "g61902";
C2441838	AUGUSTUS	exon	1	193	0.98	-	.	transcript_id "g61903.t1"; gene_id "g61903";
C2441838	AUGUSTUS	CDS	25	193	.	-	1	transcript_id "g61903.t1"; gene_id "g61903";
C2441916	AUGUSTUS	CDS	14	153	0.7	+	0	transcript_id "g61904.t1"; gene_id "g61904";
C2441982	AUGUSTUS	exon	43	193	0.87	+	.	transcript_id "g61905.t1"; gene_id "g61905";
C2441982	AUGUSTUS	CDS	70	193	.	+	0	transcript_id "g61905.t1"; gene_id "g61905";
C2442178	AUGUSTUS	CDS	1	193	0.91	+	2	transcript_id "g61906.t1"; gene_id "g61906";
C2442594	AUGUSTUS	CDS	1	193	0.66	+	1	transcript_id "g61907.t1"; gene_id "g61907";
C2442708	AUGUSTUS	CDS	1	193	0.65	-	0	transcript_id "g61908.t1"; gene_id "g61908";
C2442720	AUGUSTUS	CDS	5	193	0.98	+	0	transcript_id "g61909.t1"; gene_id "g61909";
C2442774	AUGUSTUS	exon	43	193	0.96	+	.	transcript_id "g61910.t1"; gene_id "g61910";
C2442774	AUGUSTUS	CDS	83	193	.	+	0	transcript_id "g61910.t1"; gene_id "g61910";
C2442826	AUGUSTUS	CDS	1	193	0.57	-	2	transcript_id "g61911.t1"; gene_id "g61911";
C2443016	AUGUSTUS	CDS	4	193	0.99	+	0	transcript_id "g61912.t1"; gene_id "g61912";
C2443106	AUGUSTUS	CDS	14	193	1	+	0	transcript_id "g61913.t1"; gene_id "g61913";
C2443260	AUGUSTUS	CDS	1	193	0.87	-	1	transcript_id "g61915.t1"; gene_id "g61915";
C2443262	AUGUSTUS	CDS	1	193	0.82	-	1	transcript_id "g61914.t1"; gene_id "g61914";
C2443312	AUGUSTUS	CDS	1	193	0.28	+	2	transcript_id "g61916.t1"; gene_id "g61916";
C2443352	AUGUSTUS	CDS	1	193	0.45	-	2	transcript_id "g61917.t1"; gene_id "g61917";
C2443666	AUGUSTUS	CDS	5	193	0.96	+	0	transcript_id "g61918.t1"; gene_id "g61918";
C2443682	AUGUSTUS	CDS	1	193	0.66	+	1	transcript_id "g61919.t1"; gene_id "g61919";
C2443816	AUGUSTUS	CDS	15	193	0.98	+	0	transcript_id "g61920.t1"; gene_id "g61920";
C2443984	AUGUSTUS	CDS	1	193	0.97	+	1	transcript_id "g61921.t1"; gene_id "g61921";
C2444010	AUGUSTUS	exon	1	145	0.83	-	.	transcript_id "g61922.t1"; gene_id "g61922";
C2444010	AUGUSTUS	CDS	1	114	.	-	0	transcript_id "g61922.t1"; gene_id "g61922";
C2444020	AUGUSTUS	CDS	2	193	0.69	+	0	transcript_id "g61923.t1"; gene_id "g61923";
C2444094	AUGUSTUS	exon	7	145	0.46	-	.	transcript_id "g61924.t1"; gene_id "g61924";
C2444094	AUGUSTUS	CDS	7	51	.	-	0	transcript_id "g61924.t1"; gene_id "g61924";
C2444126	AUGUSTUS	CDS	1	193	0.34	+	0	transcript_id "g61925.t1"; gene_id "g61925";
C2444184	AUGUSTUS	CDS	12	193	1	+	0	transcript_id "g61926.t1"; gene_id "g61926";
C2444200	AUGUSTUS	CDS	1	193	0.69	-	2	transcript_id "g61927.t1"; gene_id "g61927";
C2444352	AUGUSTUS	CDS	1	193	0.58	-	0	transcript_id "g61928.t1"; gene_id "g61928";
C2444476	AUGUSTUS	CDS	1	193	0.49	-	0	transcript_id "g61929.t1"; gene_id "g61929";
C2444486	AUGUSTUS	CDS	1	193	0.96	-	1	transcript_id "g61930.t1"; gene_id "g61930";
C2444750	AUGUSTUS	exon	1	154	0.41	+	.	transcript_id "g61931.t1"; gene_id "g61931";
C2444750	AUGUSTUS	CDS	1	124	.	+	1	transcript_id "g61931.t1"; gene_id "g61931";
C2444894	AUGUSTUS	exon	1	145	0.8	-	.	transcript_id "g61932.t1"; gene_id "g61932";
C2444894	AUGUSTUS	CDS	1	109	.	-	0	transcript_id "g61932.t1"; gene_id "g61932";
C2445128	AUGUSTUS	CDS	43	193	0.55	-	1	transcript_id "g61933.t1"; gene_id "g61933";
C2445314	AUGUSTUS	CDS	1	193	0.82	+	0	transcript_id "g61934.t1"; gene_id "g61934";
C2445480	AUGUSTUS	CDS	17	193	0.42	+	0	transcript_id "g61935.t1"; gene_id "g61935";
C2445600	AUGUSTUS	CDS	8	188	0.79	+	0	transcript_id "g61936.t1"; gene_id "g61936";
C2445662	AUGUSTUS	CDS	23	193	1	+	0	transcript_id "g61937.t1"; gene_id "g61937";
C2445772	AUGUSTUS	CDS	20	193	0.81	+	0	transcript_id "g61938.t1"; gene_id "g61938";
C2446202	AUGUSTUS	CDS	1	194	0.79	+	0	transcript_id "g61939.t1"; gene_id "g61939";
C2446264	AUGUSTUS	exon	19	187	0.78	+	.	transcript_id "g61940.t1"; gene_id "g61940";
C2446264	AUGUSTUS	CDS	19	164	.	+	2	transcript_id "g61940.t1"; gene_id "g61940";
C2446384	AUGUSTUS	exon	16	194	0.75	+	.	transcript_id "g61941.t1"; gene_id "g61941";
C2446384	AUGUSTUS	CDS	16	183	.	+	0	transcript_id "g61941.t1"; gene_id "g61941";
C2446416	AUGUSTUS	CDS	22	158	0.4	+	0	transcript_id "g61942.t1"; gene_id "g61942";
C2446532	AUGUSTUS	CDS	2	194	0.89	+	0	transcript_id "g61943.t1"; gene_id "g61943";
C2446548	AUGUSTUS	CDS	13	194	0.58	+	0	transcript_id "g61944.t1"; gene_id "g61944";
C2446576	AUGUSTUS	CDS	30	194	0.28	-	2	transcript_id "g61945.t1"; gene_id "g61945";
C2446830	AUGUSTUS	CDS	1	194	0.79	-	0	transcript_id "g61946.t1"; gene_id "g61946";
C2446974	AUGUSTUS	exon	1	180	0.85	+	.	transcript_id "g61947.t1"; gene_id "g61947";
C2446974	AUGUSTUS	CDS	1	145	.	+	1	transcript_id "g61947.t1"; gene_id "g61947";
C2447038	AUGUSTUS	exon	7	55	0.68	-	.	transcript_id "g61948.t1"; gene_id "g61948";
C2447038	AUGUSTUS	CDS	7	25	.	-	0	transcript_id "g61948.t1"; gene_id "g61948";
C2447178	AUGUSTUS	CDS	1	194	0.29	-	2	transcript_id "g61949.t1"; gene_id "g61949";
C2447422	AUGUSTUS	CDS	35	194	0.49	-	1	transcript_id "g61950.t1"; gene_id "g61950";
C2447524	AUGUSTUS	exon	21	189	0.95	+	.	transcript_id "g61951.t1"; gene_id "g61951";
C2447524	AUGUSTUS	CDS	21	157	.	+	2	transcript_id "g61951.t1"; gene_id "g61951";
C2447562	AUGUSTUS	CDS	1	194	0.5	+	0	transcript_id "g61952.t1"; gene_id "g61952";
C2447576	AUGUSTUS	exon	11	135	0.72	-	.	transcript_id "g61953.t1"; gene_id "g61953";
C2447576	AUGUSTUS	CDS	11	107	.	-	0	transcript_id "g61953.t1"; gene_id "g61953";
C2447642	AUGUSTUS	exon	1	152	0.19	+	.	transcript_id "g61954.t1"; gene_id "g61954";
C2447642	AUGUSTUS	CDS	1	122	.	+	2	transcript_id "g61954.t1"; gene_id "g61954";
C2447812	AUGUSTUS	CDS	1	194	0.4	-	2	transcript_id "g61955.t1"; gene_id "g61955";
C2447940	AUGUSTUS	CDS	18	194	0.78	+	0	transcript_id "g61956.t1"; gene_id "g61956";
C2447944	AUGUSTUS	CDS	1	194	0.77	-	1	transcript_id "g61957.t1"; gene_id "g61957";
C2448120	AUGUSTUS	CDS	1	194	0.85	-	2	transcript_id "g61958.t1"; gene_id "g61958";
C2448218	AUGUSTUS	CDS	2	194	0.96	+	0	transcript_id "g61959.t1"; gene_id "g61959";
C2448428	AUGUSTUS	CDS	20	194	0.42	-	0	transcript_id "g61960.t1"; gene_id "g61960";
C2448550	AUGUSTUS	CDS	10	194	0.65	+	0	transcript_id "g61961.t1"; gene_id "g61961";
C2448624	AUGUSTUS	CDS	8	140	0.5	+	0	transcript_id "g61962.t1"; gene_id "g61962";
C2448660	AUGUSTUS	exon	2	194	0.54	+	.	transcript_id "g61963.t1"; gene_id "g61963";
C2448660	AUGUSTUS	CDS	29	194	.	+	0	transcript_id "g61963.t1"; gene_id "g61963";
C2448868	AUGUSTUS	exon	1	145	0.51	-	.	transcript_id "g61964.t1"; gene_id "g61964";
C2448868	AUGUSTUS	CDS	1	117	.	-	0	transcript_id "g61964.t1"; gene_id "g61964";
C2448906	AUGUSTUS	exon	1	180	0.72	+	.	transcript_id "g61965.t1"; gene_id "g61965";
C2448906	AUGUSTUS	CDS	1	148	.	+	1	transcript_id "g61965.t1"; gene_id "g61965";
C2448938	AUGUSTUS	CDS	8	184	0.54	-	0	transcript_id "g61966.t1"; gene_id "g61966";
C2448968	AUGUSTUS	CDS	5	194	0.9	+	0	transcript_id "g61967.t1"; gene_id "g61967";
C2449157	AUGUSTUS	exon	1	194	0.81	+	.	transcript_id "g61968.t1"; gene_id "g61968";
C2449157	AUGUSTUS	CDS	1	186	.	+	0	transcript_id "g61968.t1"; gene_id "g61968";
C2449317	AUGUSTUS	CDS	1	194	0.5	-	1	transcript_id "g61969.t1"; gene_id "g61969";
C2449347	AUGUSTUS	CDS	12	29	0.43	+	0	transcript_id "g61970.t1"; gene_id "g61970";
C2449347	AUGUSTUS	CDS	75	194	0.43	+	0	transcript_id "g61970.t1"; gene_id "g61970";
C2449373	AUGUSTUS	exon	7	75	0.63	-	.	transcript_id "g61972.t1"; gene_id "g61972";
C2449373	AUGUSTUS	CDS	7	32	.	-	0	transcript_id "g61972.t1"; gene_id "g61972";
C2449389	AUGUSTUS	exon	1	157	0.63	+	.	transcript_id "g61971.t1"; gene_id "g61971";
C2449389	AUGUSTUS	CDS	1	128	.	+	2	transcript_id "g61971.t1"; gene_id "g61971";
C2449535	AUGUSTUS	exon	1	194	0.98	-	.	transcript_id "g61973.t1"; gene_id "g61973";
C2449535	AUGUSTUS	CDS	14	194	.	-	1	transcript_id "g61973.t1"; gene_id "g61973";
C2449665	AUGUSTUS	exon	1	194	0.59	+	.	transcript_id "g61974.t1"; gene_id "g61974";
C2449665	AUGUSTUS	CDS	1	185	.	+	2	transcript_id "g61974.t1"; gene_id "g61974";
C2449717	AUGUSTUS	CDS	4	194	0.82	+	0	transcript_id "g61975.t1"; gene_id "g61975";
C2449729	AUGUSTUS	CDS	1	172	0.67	-	0	transcript_id "g61976.t1"; gene_id "g61976";
C2449765	AUGUSTUS	CDS	1	194	0.27	+	0	transcript_id "g61977.t1"; gene_id "g61977";
C2449799	AUGUSTUS	CDS	4	194	0.64	+	0	transcript_id "g61978.t1"; gene_id "g61978";
C2449867	AUGUSTUS	exon	2	194	0.68	+	.	transcript_id "g61980.t1"; gene_id "g61980";
C2449867	AUGUSTUS	CDS	29	194	.	+	0	transcript_id "g61980.t1"; gene_id "g61980";
C2449871	AUGUSTUS	exon	45	194	0.85	+	.	transcript_id "g61979.t1"; gene_id "g61979";
C2449871	AUGUSTUS	CDS	84	194	.	+	0	transcript_id "g61979.t1"; gene_id "g61979";
C2449887	AUGUSTUS	exon	37	194	0.62	+	.	transcript_id "g61981.t1"; gene_id "g61981";
C2449887	AUGUSTUS	CDS	64	194	.	+	0	transcript_id "g61981.t1"; gene_id "g61981";
C2450257	AUGUSTUS	exon	1	195	1	-	.	transcript_id "g61982.t1"; gene_id "g61982";
C2450257	AUGUSTUS	CDS	61	195	.	-	0	transcript_id "g61982.t1"; gene_id "g61982";
C2450535	AUGUSTUS	exon	1	135	0.28	-	.	transcript_id "g61983.t1"; gene_id "g61983";
C2450535	AUGUSTUS	CDS	1	88	.	-	0	transcript_id "g61983.t1"; gene_id "g61983";
C2450733	AUGUSTUS	exon	1	195	1	-	.	transcript_id "g61984.t1"; gene_id "g61984";
C2450733	AUGUSTUS	CDS	10	195	.	-	0	transcript_id "g61984.t1"; gene_id "g61984";
C2450747	AUGUSTUS	CDS	1	195	0.66	+	0	transcript_id "g61985.t1"; gene_id "g61985";
C2450763	AUGUSTUS	exon	1	195	0.74	-	.	transcript_id "g61986.t1"; gene_id "g61986";
C2450763	AUGUSTUS	CDS	61	195	.	-	0	transcript_id "g61986.t1"; gene_id "g61986";
C2450837	AUGUSTUS	exon	1	125	0.88	-	.	transcript_id "g61987.t1"; gene_id "g61987";
C2450837	AUGUSTUS	CDS	1	101	.	-	0	transcript_id "g61987.t1"; gene_id "g61987";
C2450921	AUGUSTUS	exon	1	195	0.61	-	.	transcript_id "g61988.t1"; gene_id "g61988";
C2450921	AUGUSTUS	CDS	7	195	.	-	0	transcript_id "g61988.t1"; gene_id "g61988";
C2451165	AUGUSTUS	exon	20	195	0.58	+	.	transcript_id "g61989.t1"; gene_id "g61989";
C2451165	AUGUSTUS	CDS	20	191	.	+	1	transcript_id "g61989.t1"; gene_id "g61989";
C2451185	AUGUSTUS	CDS	1	195	0.78	-	1	transcript_id "g61990.t1"; gene_id "g61990";
C2451217	AUGUSTUS	CDS	30	195	0.4	-	1	transcript_id "g61991.t1"; gene_id "g61991";
C2451335	AUGUSTUS	CDS	1	195	0.39	-	0	transcript_id "g61992.t1"; gene_id "g61992";
C2451361	AUGUSTUS	CDS	1	195	0.49	+	2	transcript_id "g61993.t1"; gene_id "g61993";
C2451655	AUGUSTUS	exon	1	195	0.98	-	.	transcript_id "g61994.t1"; gene_id "g61994";
C2451655	AUGUSTUS	CDS	13	195	.	-	0	transcript_id "g61994.t1"; gene_id "g61994";
C2451833	AUGUSTUS	exon	1	195	0.99	-	.	transcript_id "g61995.t1"; gene_id "g61995";
C2451833	AUGUSTUS	CDS	36	195	.	-	1	transcript_id "g61995.t1"; gene_id "g61995";
C2451857	AUGUSTUS	CDS	1	195	1	+	1	transcript_id "g61996.t1"; gene_id "g61996";
C2451905	AUGUSTUS	CDS	4	160	0.76	+	0	transcript_id "g61997.t1"; gene_id "g61997";
C2452071	AUGUSTUS	exon	1	185	0.86	-	.	transcript_id "g61998.t1"; gene_id "g61998";
C2452071	AUGUSTUS	CDS	18	185	.	-	0	transcript_id "g61998.t1"; gene_id "g61998";
C2452077	AUGUSTUS	CDS	1	195	0.66	-	2	transcript_id "g61999.t1"; gene_id "g61999";
C2452237	AUGUSTUS	CDS	8	195	0.98	+	0	transcript_id "g62000.t1"; gene_id "g62000";
C2452341	AUGUSTUS	exon	1	126	0.57	+	.	transcript_id "g62004.t1"; gene_id "g62004";
C2452341	AUGUSTUS	CDS	1	60	.	+	0	transcript_id "g62004.t1"; gene_id "g62004";
C2452379	AUGUSTUS	CDS	2	195	0.94	+	0	transcript_id "g62001.t1"; gene_id "g62001";
C2452389	AUGUSTUS	CDS	2	195	0.55	+	0	transcript_id "g62002.t1"; gene_id "g62002";
C2452477	AUGUSTUS	CDS	1	195	0.43	-	0	transcript_id "g62003.t1"; gene_id "g62003";
C2452671	AUGUSTUS	CDS	1	195	0.41	-	2	transcript_id "g62005.t1"; gene_id "g62005";
C2452703	AUGUSTUS	exon	7	55	0.73	-	.	transcript_id "g62007.t1"; gene_id "g62007";
C2452703	AUGUSTUS	CDS	7	28	.	-	0	transcript_id "g62007.t1"; gene_id "g62007";
C2452731	AUGUSTUS	exon	7	115	0.33	-	.	transcript_id "g62006.t1"; gene_id "g62006";
C2452731	AUGUSTUS	CDS	7	62	.	-	0	transcript_id "g62006.t1"; gene_id "g62006";
C2452891	AUGUSTUS	exon	1	195	0.77	-	.	transcript_id "g62008.t1"; gene_id "g62008";
C2452891	AUGUSTUS	CDS	62	195	.	-	2	transcript_id "g62008.t1"; gene_id "g62008";
C2452917	AUGUSTUS	exon	1	195	0.99	-	.	transcript_id "g62009.t1"; gene_id "g62009";
C2452917	AUGUSTUS	CDS	9	195	.	-	1	transcript_id "g62009.t1"; gene_id "g62009";
C2452925	AUGUSTUS	CDS	1	195	0.89	-	0	transcript_id "g62010.t1"; gene_id "g62010";
C2452947	AUGUSTUS	CDS	13	195	0.37	-	0	transcript_id "g62011.t1"; gene_id "g62011";
C2453009	AUGUSTUS	CDS	1	195	0.95	+	1	transcript_id "g62012.t1"; gene_id "g62012";
C2453035	AUGUSTUS	CDS	5	195	0.45	+	0	transcript_id "g62013.t1"; gene_id "g62013";
C2453255	AUGUSTUS	exon	1	135	0.94	-	.	transcript_id "g62014.t1"; gene_id "g62014";
C2453255	AUGUSTUS	CDS	1	108	.	-	0	transcript_id "g62014.t1"; gene_id "g62014";
C2453295	AUGUSTUS	CDS	1	195	0.46	-	2	transcript_id "g62015.t1"; gene_id "g62015";
C2453449	AUGUSTUS	exon	1	182	0.6	+	.	transcript_id "g62016.t1"; gene_id "g62016";
C2453449	AUGUSTUS	CDS	1	130	.	+	1	transcript_id "g62016.t1"; gene_id "g62016";
C2453517	AUGUSTUS	exon	1	180	0.85	+	.	transcript_id "g62017.t1"; gene_id "g62017";
C2453517	AUGUSTUS	CDS	1	155	.	+	2	transcript_id "g62017.t1"; gene_id "g62017";
C2453785	AUGUSTUS	CDS	1	195	0.49	+	2	transcript_id "g62018.t1"; gene_id "g62018";
C2453809	AUGUSTUS	CDS	1	195	0.75	-	2	transcript_id "g62019.t1"; gene_id "g62019";
C2453821	AUGUSTUS	CDS	1	195	0.76	+	2	transcript_id "g62020.t1"; gene_id "g62020";
C2453849	AUGUSTUS	CDS	13	195	0.97	-	0	transcript_id "g62021.t1"; gene_id "g62021";
C2453903	AUGUSTUS	CDS	14	195	1	+	0	transcript_id "g62022.t1"; gene_id "g62022";
C2454019	AUGUSTUS	CDS	1	195	0.78	+	2	transcript_id "g62023.t1"; gene_id "g62023";
C2454025	AUGUSTUS	exon	1	190	0.22	+	.	transcript_id "g62024.t1"; gene_id "g62024";
C2454025	AUGUSTUS	CDS	1	149	.	+	2	transcript_id "g62024.t1"; gene_id "g62024";
C2454057	AUGUSTUS	CDS	5	195	0.46	+	0	transcript_id "g62025.t1"; gene_id "g62025";
C2454545	AUGUSTUS	exon	1	186	0.96	-	.	transcript_id "g62026.t1"; gene_id "g62026";
C2454545	AUGUSTUS	CDS	70	186	.	-	0	transcript_id "g62026.t1"; gene_id "g62026";
C2454633	AUGUSTUS	CDS	1	196	0.11	+	0	transcript_id "g62027.t1"; gene_id "g62027";
C2454961	AUGUSTUS	exon	1	196	0.99	+	.	transcript_id "g62028.t1"; gene_id "g62028";
C2454961	AUGUSTUS	CDS	1	195	.	+	0	transcript_id "g62028.t1"; gene_id "g62028";
C2455121	AUGUSTUS	CDS	3	153	0.49	+	0	transcript_id "g62029.t1"; gene_id "g62029";
C2455125	AUGUSTUS	exon	1	145	0.85	-	.	transcript_id "g62030.t1"; gene_id "g62030";
C2455125	AUGUSTUS	CDS	1	124	.	-	0	transcript_id "g62030.t1"; gene_id "g62030";
C2455209	AUGUSTUS	exon	1	196	0.91	-	.	transcript_id "g62031.t1"; gene_id "g62031";
C2455209	AUGUSTUS	CDS	19	196	.	-	1	transcript_id "g62031.t1"; gene_id "g62031";
C2455233	AUGUSTUS	CDS	1	196	0.29	+	2	transcript_id "g62032.t1"; gene_id "g62032";
C2455417	AUGUSTUS	exon	1	196	0.81	-	.	transcript_id "g62033.t1"; gene_id "g62033";
C2455417	AUGUSTUS	CDS	6	196	.	-	2	transcript_id "g62033.t1"; gene_id "g62033";
C2455467	AUGUSTUS	CDS	1	196	0.9	+	0	transcript_id "g62034.t1"; gene_id "g62034";
C2455733	AUGUSTUS	exon	1	135	0.32	-	.	transcript_id "g62035.t1"; gene_id "g62035";
C2455733	AUGUSTUS	CDS	1	100	.	-	0	transcript_id "g62035.t1"; gene_id "g62035";
C2455811	AUGUSTUS	exon	1	196	0.99	-	.	transcript_id "g62036.t1"; gene_id "g62036";
C2455811	AUGUSTUS	CDS	20	196	.	-	0	transcript_id "g62036.t1"; gene_id "g62036";
C2455841	AUGUSTUS	exon	1	196	1	-	.	transcript_id "g62037.t1"; gene_id "g62037";
C2455841	AUGUSTUS	CDS	10	196	.	-	1	transcript_id "g62037.t1"; gene_id "g62037";
C2456093	AUGUSTUS	exon	14	122	0.28	+	.	transcript_id "g62039.t1"; gene_id "g62039";
C2456093	AUGUSTUS	CDS	14	65	.	+	1	transcript_id "g62039.t1"; gene_id "g62039";
C2456129	AUGUSTUS	CDS	1	196	0.86	-	0	transcript_id "g62038.t1"; gene_id "g62038";
C2456301	AUGUSTUS	CDS	9	191	0.56	+	0	transcript_id "g62040.t1"; gene_id "g62040";
C2456305	AUGUSTUS	exon	1	196	0.95	-	.	transcript_id "g62041.t1"; gene_id "g62041";
C2456305	AUGUSTUS	CDS	16	196	.	-	1	transcript_id "g62041.t1"; gene_id "g62041";
C2456535	AUGUSTUS	CDS	1	196	0.42	+	1	transcript_id "g62042.t1"; gene_id "g62042";
C2456573	AUGUSTUS	CDS	2	196	0.97	+	0	transcript_id "g62043.t1"; gene_id "g62043";
C2456629	AUGUSTUS	exon	1	125	0.32	-	.	transcript_id "g62045.t1"; gene_id "g62045";
C2456629	AUGUSTUS	CDS	1	93	.	-	0	transcript_id "g62045.t1"; gene_id "g62045";
C2456637	AUGUSTUS	exon	1	97	0.43	+	.	transcript_id "g62044.t1"; gene_id "g62044";
C2456637	AUGUSTUS	CDS	1	47	.	+	2	transcript_id "g62044.t1"; gene_id "g62044";
C2456687	AUGUSTUS	CDS	17	196	0.51	+	0	transcript_id "g62046.t1"; gene_id "g62046";
C2456711	AUGUSTUS	CDS	1	196	0.99	-	1	transcript_id "g62047.t1"; gene_id "g62047";
C2456861	AUGUSTUS	exon	1	196	0.72	-	.	transcript_id "g62048.t1"; gene_id "g62048";
C2456861	AUGUSTUS	CDS	16	196	.	-	1	transcript_id "g62048.t1"; gene_id "g62048";
C2456911	AUGUSTUS	CDS	1	196	0.38	-	2	transcript_id "g62049.t1"; gene_id "g62049";
C2456931	AUGUSTUS	exon	1	196	0.37	-	.	transcript_id "g62050.t1"; gene_id "g62050";
C2456931	AUGUSTUS	CDS	38	196	.	-	0	transcript_id "g62050.t1"; gene_id "g62050";
C2456957	AUGUSTUS	CDS	1	196	1	+	1	transcript_id "g62051.t1"; gene_id "g62051";
C2456959	AUGUSTUS	CDS	1	196	1	+	1	transcript_id "g62052.t1"; gene_id "g62052";
C2457003	AUGUSTUS	CDS	1	196	0.98	+	0	transcript_id "g62053.t1"; gene_id "g62053";
C2457053	AUGUSTUS	CDS	13	196	0.68	+	0	transcript_id "g62054.t1"; gene_id "g62054";
C2457107	AUGUSTUS	CDS	19	196	0.61	+	0	transcript_id "g62055.t1"; gene_id "g62055";
C2457157	AUGUSTUS	CDS	12	196	0.51	+	0	transcript_id "g62056.t1"; gene_id "g62056";
C2457229	AUGUSTUS	exon	1	196	0.98	-	.	transcript_id "g62057.t1"; gene_id "g62057";
C2457229	AUGUSTUS	CDS	10	196	.	-	1	transcript_id "g62057.t1"; gene_id "g62057";
C2457255	AUGUSTUS	CDS	1	196	0.92	+	0	transcript_id "g62058.t1"; gene_id "g62058";
C2457481	AUGUSTUS	CDS	4	196	0.68	+	0	transcript_id "g62059.t1"; gene_id "g62059";
C2457521	AUGUSTUS	exon	41	190	0.49	+	.	transcript_id "g62061.t1"; gene_id "g62061";
C2457521	AUGUSTUS	CDS	41	165	.	+	2	transcript_id "g62061.t1"; gene_id "g62061";
C2457543	AUGUSTUS	CDS	20	163	0.72	+	0	transcript_id "g62060.t1"; gene_id "g62060";
C2458011	AUGUSTUS	CDS	1	196	0.59	-	0	transcript_id "g62062.t1"; gene_id "g62062";
C2458033	AUGUSTUS	CDS	22	196	0.43	+	0	transcript_id "g62063.t1"; gene_id "g62063";
C2458153	AUGUSTUS	CDS	16	196	0.91	+	0	transcript_id "g62064.t1"; gene_id "g62064";
C2458155	AUGUSTUS	CDS	1	196	0.58	+	0	transcript_id "g62065.t1"; gene_id "g62065";
C2458205	AUGUSTUS	CDS	20	196	0.95	+	0	transcript_id "g62066.t1"; gene_id "g62066";
C2458219	AUGUSTUS	exon	1	196	0.68	-	.	transcript_id "g62067.t1"; gene_id "g62067";
C2458219	AUGUSTUS	CDS	22	196	.	-	1	transcript_id "g62067.t1"; gene_id "g62067";
C2458729	AUGUSTUS	CDS	1	197	0.14	+	1	transcript_id "g62068.t1"; gene_id "g62068";
C2458799	AUGUSTUS	CDS	1	197	0.6	+	1	transcript_id "g62069.t1"; gene_id "g62069";
C2459073	AUGUSTUS	exon	1	197	0.28	+	.	transcript_id "g62070.t1"; gene_id "g62070";
C2459073	AUGUSTUS	CDS	1	171	.	+	0	transcript_id "g62070.t1"; gene_id "g62070";
C2459125	AUGUSTUS	CDS	18	168	0.45	+	0	transcript_id "g62071.t1"; gene_id "g62071";
C2459157	AUGUSTUS	exon	1	197	0.95	-	.	transcript_id "g62072.t1"; gene_id "g62072";
C2459157	AUGUSTUS	CDS	34	197	.	-	2	transcript_id "g62072.t1"; gene_id "g62072";
C2459203	AUGUSTUS	CDS	5	197	0.6	+	0	transcript_id "g62073.t1"; gene_id "g62073";
C2459415	AUGUSTUS	exon	1	197	0.98	-	.	transcript_id "g62074.t1"; gene_id "g62074";
C2459415	AUGUSTUS	CDS	7	197	.	-	2	transcript_id "g62074.t1"; gene_id "g62074";
C2459589	AUGUSTUS	exon	1	197	0.88	-	.	transcript_id "g62075.t1"; gene_id "g62075";
C2459589	AUGUSTUS	CDS	4	197	.	-	2	transcript_id "g62075.t1"; gene_id "g62075";
C2459603	AUGUSTUS	exon	7	125	0.53	-	.	transcript_id "g62076.t1"; gene_id "g62076";
C2459603	AUGUSTUS	CDS	7	100	.	-	0	transcript_id "g62076.t1"; gene_id "g62076";
C2459831	AUGUSTUS	CDS	19	197	0.61	+	0	transcript_id "g62077.t1"; gene_id "g62077";
C2460041	AUGUSTUS	exon	1	197	0.78	-	.	transcript_id "g62078.t1"; gene_id "g62078";
C2460041	AUGUSTUS	CDS	91	197	.	-	2	transcript_id "g62078.t1"; gene_id "g62078";
C2460103	AUGUSTUS	CDS	1	158	0.59	+	0	transcript_id "g62079.t1"; gene_id "g62079";
C2460115	AUGUSTUS	exon	7	55	0.61	-	.	transcript_id "g62080.t1"; gene_id "g62080";
C2460115	AUGUSTUS	CDS	7	30	.	-	0	transcript_id "g62080.t1"; gene_id "g62080";
C2460179	AUGUSTUS	CDS	4	197	0.86	+	0	transcript_id "g62081.t1"; gene_id "g62081";
C2460313	AUGUSTUS	CDS	1	197	0.53	+	1	transcript_id "g62082.t1"; gene_id "g62082";
C2460879	AUGUSTUS	CDS	1	197	0.66	-	1	transcript_id "g62083.t1"; gene_id "g62083";
C2460953	AUGUSTUS	CDS	1	197	0.92	+	2	transcript_id "g62084.t1"; gene_id "g62084";
C2460975	AUGUSTUS	exon	1	197	0.93	-	.	transcript_id "g62085.t1"; gene_id "g62085";
C2460975	AUGUSTUS	CDS	31	197	.	-	2	transcript_id "g62085.t1"; gene_id "g62085";
C2461013	AUGUSTUS	CDS	1	197	0.5	+	2	transcript_id "g62086.t1"; gene_id "g62086";
C2461015	AUGUSTUS	exon	1	197	0.81	-	.	transcript_id "g62087.t1"; gene_id "g62087";
[truncated: 416,402+ more rows]
